# Supplementary material for: Proteome-wide signatures of function in highly diverged intrinsically disordered regions
Source: eLife journal article supplement (doi:10.7554/elife.46883), 2019-07-02
Supplement: fig3-data1 [file elife-46883-fig3-data1-v3.csv]

	idr_name	idr_alt_name	clust_no	significant_cluster_ID
1	YCR032W_aa_1410-1445	YCR032W_idr_30	1	NA
2	YCR042C_aa_776-806	YCR042C_idr_20	1	NA
3	YIL002C_aa_851-893	YIL002C_idr_3	1	NA
4	YBR150C_aa_146-265	YBR150C_idr_2	1	NA
5	YFR023W_aa_260-297	YFR023W_idr_4	1	NA
6	YDR150W_aa_113-2565	YDR150W_idr_2	1	NA
7	YER064C_aa_421-473	YER064C_idr_3	1	NA
8	YOR191W_aa_798-911	YOR191W_idr_14	1	NA
9	YHR079C_aa_452-529	YHR079C_idr_13	1	NA
10	YJR090C_aa_260-312	YJR090C_idr_3	1	NA
11	YLR087C_aa_1302-1341	YLR087C_idr_17	1	NA
12	YDR473C_aa_1-39	YDR473C_idr_1	1	NA
13	YAL032C_aa_241-281	YAL032C_idr_8	1	NA
14	YNL253W_aa_393-422	YNL253W_idr_2	1	NA
15	YGL131C_aa_609-653	YGL131C_idr_26	1	NA
16	YML015C_aa_65-116	YML015C_idr_3	1	NA
17	YGL094C_aa_412-470	YGL094C_idr_12	1	NA
18	YOL066C_aa_1-57	YOL066C_idr_1	1	NA
19	YCR071C_aa_1-42	YCR071C_idr_1	1	NA
20	YEL062W_aa_497-572	YEL062W_idr_5	1	NA
21	YLR139C_aa_52-84	YLR139C_idr_2	1	NA
22	YJL134W_aa_1-32	YJL134W_idr_1	1	NA
23	YDL239C_aa_1-31	YDL239C_idr_1	1	NA
24	YFL026W_aa_382-431	YFL026W_idr_4	1	NA
25	YGL150C_aa_1157-1208	YGL150C_idr_9	1	NA
26	YLR247C_aa_883-918	YLR247C_idr_13	1	NA
27	YLR313C_aa_484-525	YLR313C_idr_10	1	NA
28	YGR276C_aa_1-53	YGR276C_idr_1	1	NA
29	YML102W_aa_418-468	YML102W_idr_1	1	NA
30	YKR031C_aa_1584-1638	YKR031C_idr_10	1	NA
31	YIL113W_aa_1-46	YIL113W_idr_1	1	NA
32	YLR139C_aa_1-31	YLR139C_idr_1	1	NA
33	YLR228C_aa_1-40	YLR228C_idr_1	1	NA
34	YJL194W_aa_1-54	YJL194W_idr_1	1	NA
35	YJR098C_aa_466-517	YJR098C_idr_3	1	NA
36	YHR124W_aa_476-538	YHR124W_idr_9	1	NA
37	YLR189C_aa_1165-1198	YLR189C_idr_6	1	NA
38	YDL234C_aa_701-746	YDL234C_idr_8	1	NA
39	YKR010C_aa_488-522	YKR010C_idr_4	1	NA
40	YML080W_aa_389-423	YML080W_idr_3	1	NA
41	YDR176W_aa_1-32	YDR176W_idr_1	1	NA
42	YFR037C_aa_206-250	YFR037C_idr_2	1	NA
43	YKL050C_aa_719-760	YKL050C_idr_9	1	NA
44	YDR273W_aa_1-82	YDR273W_idr_1	1	NA
45	YFL023W_aa_154-221	YFL023W_idr_11	1	NA
46	YBR129C_aa_156-205	YBR129C_idr_4	1	NA
47	YJL176C_aa_623-668	YJL176C_idr_10	1	NA
48	YHL019C_aa_512-549	YHL019C_idr_5	1	NA
49	YGR010W_aa_53-112	YGR010W_idr_2	1	NA
50	YHL020C_aa_75-117	YHL020C_idr_3	1	NA
51	YLR271W_aa_1-38	YLR271W_idr_1	1	NA
52	YHR124W_aa_1-38	YHR124W_idr_1	1	NA
53	YJR015W_aa_1-67	YJR015W_idr_1	1	NA
54	YGL208W_aa_253-301	YGL208W_idr_2	1	NA
55	YML114C_aa_230-272	YML114C_idr_11	1	NA
56	YKR008W_aa_1-52	YKR008W_idr_1	1	NA
57	YKR084C_aa_76-158	YKR084C_idr_3	1	NA
58	YKR086W_aa_68-215	YKR086W_idr_15	1	NA
59	YHR164C_aa_54-410	YHR164C_idr_10	1	NA
60	YOR191W_aa_356-405	YOR191W_idr_30	1	NA
61	YJL162C_aa_368-406	YJL162C_idr_4	1	NA
62	YPL016W_aa_821-876	YPL016W_idr_14	1	NA
63	YDR207C_aa_1-32	YDR207C_idr_1	1	NA
64	YCL010C_aa_74-117	YCL010C_idr_2	1	NA
65	YKR029C_aa_1-111	YKR029C_idr_1	1	NA
66	YLR095C_aa_617-646	YLR095C_idr_5	1	NA
67	YER083C_aa_38-75	YER083C_idr_2	1	NA
68	YPL249C_aa_852-886	YPL249C_idr_5	1	NA
69	YLR433C_aa_412-451	YLR433C_idr_5	1	NA
70	YNL087W_aa_1-52	YNL087W_idr_1	1	NA
71	YOR086C_aa_1-56	YOR086C_idr_1	1	NA
72	YJR089W_aa_598-645	YJR089W_idr_13	1	NA
73	YLL007C_aa_501-555	YLL007C_idr_5	1	NA
74	YOR025W_aa_1-31	YOR025W_idr_1	1	NA
75	YLR032W_aa_122-167	YLR032W_idr_7	1	NA
76	YOR076C_aa_1-132	YOR076C_idr_1	1	NA
77	YDR456W_aa_1-52	YDR456W_idr_1	1	NA
78	YDR501W_aa_1-41	YDR501W_idr_1	1	NA
79	YCL051W_aa_1-35	YCL051W_idr_1	1	NA
80	YNL305C_aa_1-30	YNL305C_idr_1	1	NA
81	YPR105C_aa_540-595	YPR105C_idr_12	1	NA
82	YBR205W_aa_1-63	YBR205W_idr_1	1	NA
83	YBL091C-A_aa_134-166	YBL091C-A_idr_1	1	NA
84	YKR016W_aa_98-135	YKR016W_idr_2	1	NA
85	YDR483W_aa_1-100	YDR483W_idr_1	1	NA
86	YPL053C_aa_1-99	YPL053C_idr_1	1	NA
87	YKR042W_aa_1-33	YKR042W_idr_1	1	NA
88	YMR305C_aa_1-31	YMR305C_idr_1	1	NA
89	YLR189C_aa_681-730	YLR189C_idr_5	1	NA
90	YOL089C_aa_303-351	YOL089C_idr_6	1	NA
91	YCL048W_aa_406-455	YCL048W_idr_7	1	NA
92	YPR122W_aa_980-1018	YPR122W_idr_11	1	NA
93	YLR305C_aa_456-518	YLR305C_idr_21	1	NA
94	YKR098C_aa_122-292	YKR098C_idr_2	1	NA
95	YIL156W_aa_138-202	YIL156W_idr_4	1	NA
96	YMR042W_aa_1-78	YMR042W_idr_1	1	NA
97	YPR137W_aa_1-58	YPR137W_idr_1	1	NA
98	YDR124W_aa_232-299	YDR124W_idr_7	2	NA
99	YIL101C_aa_131-161	YIL101C_idr_4	2	NA
100	YDR501W_aa_44-88	YDR501W_idr_2	2	NA
101	YLR183C_aa_59-106	YLR183C_idr_2	2	NA
102	YAR042W_aa_561-593	YAR042W_idr_15	2	NA
103	YHL035C_aa_903-960	YHL035C_idr_2	2	NA
104	YDR239C_aa_738-768	YDR239C_idr_9	2	NA
105	YHR006W_aa_34-106	YHR006W_idr_5	2	NA
106	YGR126W_aa_40-90	YGR126W_idr_2	2	NA
107	YER024W_aa_850-923	YER024W_idr_3	2	NA
108	YHL029C_aa_605-639	YHL029C_idr_7	2	NA
109	YIL122W_aa_1-52	YIL122W_idr_1	2	NA
110	YBR152W_aa_1-30	YBR152W_idr_1	2	NA
111	YCR077C_aa_403-471	YCR077C_idr_2	2	NA
112	YMR196W_aa_952-1049	YMR196W_idr_7	2	NA
113	YLR422W_aa_114-152	YLR422W_idr_32	2	NA
114	YAL051W_aa_109-183	YAL051W_idr_10	2	NA
115	YNL271C_aa_1751-1953	YNL271C_idr_24	2	NA
116	YDR363W_aa_50-194	YDR363W_idr_4	2	NA
117	YGR261C_aa_657-809	YGR261C_idr_8	2	NA
118	YER132C_aa_1241-1535	YER132C_idr_4	2	NA
119	YGL197W_aa_1138-1423	YGL197W_idr_9	2	NA
120	YDL080C_aa_574-604	YDL080C_idr_3	2	NA
121	YDR239C_aa_432-549	YDR239C_idr_3	2	NA
122	YDR014W_aa_1-104	YDR014W_idr_1	2	NA
123	YJR053W_aa_19-87	YJR053W_idr_5	2	NA
124	YNR012W_aa_1-42	YNR012W_idr_1	2	NA
125	YNL275W_aa_1-52	YNL275W_idr_1	2	NA
126	YOL089C_aa_930-1001	YOL089C_idr_2	2	NA
127	YDR475C_aa_29-63	YDR475C_idr_4	2	NA
128	YHR182W_aa_315-344	YHR182W_idr_3	2	NA
129	YIL079C_aa_1-41	YIL079C_idr_1	2	NA
130	YMR089C_aa_790-825	YMR089C_idr_2	2	NA
131	YAL017W_aa_879-1088	YAL017W_idr_7	2	NA
132	YLR098C_aa_82-194	YLR098C_idr_2	2	NA
133	YIL147C_aa_743-772	YIL147C_idr_10	2	NA
134	YIR007W_aa_586-640	YIR007W_idr_2	2	NA
135	YHR158C_aa_943-978	YHR158C_idr_7	2	NA
136	YNL218W_aa_35-127	YNL218W_idr_2	2	NA
137	YDR179W-A_aa_1-62	YDR179W-A_idr_1	2	NA
138	YFR014C_aa_342-385	YFR014C_idr_2	2	NA
139	YDR522C_aa_435-478	YDR522C_idr_2	2	NA
140	YIL031W_aa_272-425	YIL031W_idr_11	2	NA
141	YNL267W_aa_211-434	YNL267W_idr_10	2	NA
142	YOL081W_aa_594-670	YOL081W_idr_60	2	NA
143	YBL088C_aa_2708-2739	YBL088C_idr_43	2	NA
144	YCL061C_aa_854-1096	YCL061C_idr_4	2	NA
145	YCR066W_aa_116-183	YCR066W_idr_3	2	NA
146	YDR128W_aa_642-732	YDR128W_idr_5	2	NA
147	YDL101C_aa_141-191	YDL101C_idr_2	2	NA
148	YPR117W_aa_2411-2489	YPR117W_idr_43	2	NA
149	YMR163C_aa_520-611	YMR163C_idr_8	2	NA
150	YOR311C_aa_1-50	YOR311C_idr_1	2	NA
151	YCR032W_aa_1297-1370	YCR032W_idr_29	2	NA
152	YIL047C_aa_810-867	YIL047C_idr_7	2	NA
153	YPR117W_aa_1677-1736	YPR117W_idr_31	2	NA
154	YMR212C_aa_729-782	YMR212C_idr_7	2	NA
155	YJL207C_aa_1984-2014	YJL207C_idr_25	2	NA
156	YLR106C_aa_3818-3857	YLR106C_idr_88	2	NA
157	YDR329C_aa_174-216	YDR329C_idr_4	2	NA
158	YOR296W_aa_744-793	YOR296W_idr_19	2	NA
159	YNL101W_aa_199-232	YNL101W_idr_4	2	NA
160	YIR004W_aa_165-196	YIR004W_idr_5	2	NA
161	YGR048W_aa_307-361	YGR048W_idr_4	2	NA
162	YGR251W_aa_149-196	YGR251W_idr_4	2	NA
163	YKR067W_aa_622-667	YKR067W_idr_2	2	NA
164	YMR176W_aa_293-330	YMR176W_idr_15	2	NA
165	YNR011C_aa_1-61	YNR011C_idr_1	2	NA
166	YOL122C_aa_1-68	YOL122C_idr_1	2	NA
167	YKL048C_aa_1-74	YKL048C_idr_1	2	NA
168	YLR427W_aa_544-670	YLR427W_idr_6	2	NA
169	YMR232W_aa_349-407	YMR232W_idr_8	2	NA
170	YCR048W_aa_131-171	YCR048W_idr_3	3	NA
171	YDL031W_aa_708-785	YDL031W_idr_17	3	NA
172	YMR067C_aa_372-411	YMR067C_idr_5	3	NA
173	YDL171C_aa_1557-1637	YDL171C_idr_6	3	NA
174	YOR175C_aa_481-534	YOR175C_idr_4	3	NA
175	YCR037C_aa_407-436	YCR037C_idr_3	3	NA
176	YAR018C_aa_362-435	YAR018C_idr_3	3	NA
177	YFL007W_aa_1821-1874	YFL007W_idr_10	3	NA
178	YJL131C_aa_324-356	YJL131C_idr_4	3	NA
179	YBR065C_aa_125-188	YBR065C_idr_2	3	NA
180	YKL050C_aa_435-556	YKL050C_idr_19	3	NA
181	YNL243W_aa_536-566	YNL243W_idr_17	3	NA
182	YGR089W_aa_889-936	YGR089W_idr_8	3	NA
183	YHL002W_aa_281-320	YHL002W_idr_3	3	NA
184	YOR191W_aa_592-737	YOR191W_idr_9	3	NA
185	YCL024W_aa_367-933	YCL024W_idr_4	3	NA
186	YDR507C_aa_366-1040	YDR507C_idr_5	3	NA
187	YER172C_aa_71-100	YER172C_idr_18	3	NA
188	YIL150C_aa_39-152	YIL150C_idr_2	3	NA
189	YDL058W_aa_717-1790	YDL058W_idr_7	3	NA
190	YDR356W_aa_150-765	YDR356W_idr_5	3	NA
191	YHR023W_aa_935-1188	YHR023W_idr_13	3	NA
192	YKR095W_aa_1313-1464	YKR095W_idr_62	3	NA
193	YLR309C_aa_133-214	YLR309C_idr_21	3	NA
194	YIL149C_aa_57-180	YIL149C_idr_23	3	NA
195	YKR095W_aa_77-169	YKR095W_idr_23	3	NA
196	YKR095W_aa_857-923	YKR095W_idr_32	3	NA
197	YCR033W_aa_554-620	YCR033W_idr_2	3	NA
198	YGL131C_aa_371-410	YGL131C_idr_21	3	NA
199	YKR023W_aa_273-322	YKR023W_idr_7	3	NA
200	YJL049W_aa_385-450	YJL049W_idr_8	3	NA
201	YDL207W_aa_141-242	YDL207W_idr_4	3	NA
202	YDR049W_aa_550-614	YDR049W_idr_9	3	NA
203	YDR332W_aa_408-447	YDR332W_idr_3	3	NA
204	YPL074W_aa_139-190	YPL074W_idr_6	3	NA
205	YPR018W_aa_66-247	YPR018W_idr_2	3	NA
206	YOR308C_aa_465-515	YOR308C_idr_3	3	NA
207	YIL149C_aa_1413-1447	YIL149C_idr_72	3	NA
208	YKR095W_aa_1466-1499	YKR095W_idr_63	3	NA
209	YPL174C_aa_93-201	YPL174C_idr_12	3	NA
210	YPL216W_aa_696-740	YPL216W_idr_2	3	NA
211	YGL092W_aa_615-800	YGL092W_idr_3	3	NA
212	YPR175W_aa_563-595	YPR175W_idr_11	3	NA
213	YLR272C_aa_872-908	YLR272C_idr_7	3	NA
214	YMR277W_aa_359-457	YMR277W_idr_4	3	NA
215	YBR227C_aa_81-123	YBR227C_idr_12	3	NA
216	YOR087W_aa_553-610	YOR087W_idr_3	3	NA
217	YMR031C_aa_237-312	YMR031C_idr_13	3	NA
218	YBL104C_aa_963-995	YBL104C_idr_3	3	NA
219	YBR055C_aa_36-71	YBR055C_idr_8	3	NA
220	YAL032C_aa_344-379	YAL032C_idr_2	3	NA
221	YKL143W_aa_278-340	YKL143W_idr_5	3	NA
222	YGR260W_aa_1-72	YGR260W_idr_1	3	NA
223	YDR027C_aa_171-200	YDR027C_idr_2	3	NA
224	YNL125C_aa_618-649	YNL125C_idr_6	3	NA
225	YLL003W_aa_1-30	YLL003W_idr_1	3	NA
226	YGL227W_aa_740-770	YGL227W_idr_3	3	NA
227	YDL234C_aa_306-350	YDL234C_idr_6	3	NA
228	YML015C_aa_223-297	YML015C_idr_4	3	NA
229	YHL016C_aa_704-735	YHL016C_idr_4	3	NA
230	YJR152W_aa_1-57	YJR152W_idr_1	3	NA
231	YNL293W_aa_561-602	YNL293W_idr_7	3	NA
232	YKL064W_aa_286-399	YKL064W_idr_3	3	NA
233	YLR362W_aa_205-408	YLR362W_idr_3	3	NA
234	YPL110C_aa_34-67	YPL110C_idr_5	3	NA
235	YPR031W_aa_445-496	YPR031W_idr_12	3	NA
236	YFR040W_aa_857-941	YFR040W_idr_10	4	NA
237	YGL229C_aa_746-818	YGL229C_idr_3	4	NA
238	YGL160W_aa_450-511	YGL160W_idr_3	4	NA
239	YGR166W_aa_128-197	YGR166W_idr_2	4	NA
240	YDR443C_aa_305-818	YDR443C_idr_9	4	NA
241	YER016W_aa_281-344	YER016W_idr_4	4	NA
242	YGR023W_aa_431-486	YGR023W_idr_2	4	NA
243	YNL201C_aa_506-562	YNL201C_idr_6	4	NA
244	YBL056W_aa_307-468	YBL056W_idr_2	4	NA
245	YER089C_aa_307-464	YER089C_idr_2	4	NA
246	YKR099W_aa_720-807	YKR099W_idr_5	4	NA
247	YBR215W_aa_488-574	YBR215W_idr_4	4	NA
248	YGL019W_aa_78-110	YGL019W_idr_2	4	NA
249	YLR115W_aa_439-517	YLR115W_idr_2	4	NA
250	YFL013C_aa_1-119	YFL013C_idr_1	4	NA
251	YGL073W_aa_697-737	YGL073W_idr_3	4	NA
252	YGL201C_aa_846-899	YGL201C_idr_11	4	NA
253	YHL035C_aa_63-98	YHL035C_idr_13	4	NA
254	YDL138W_aa_677-714	YDL138W_idr_4	4	NA
255	YDL194W_aa_691-726	YDL194W_idr_5	4	NA
256	YDR143C_aa_167-234	YDR143C_idr_3	4	NA
257	YMR243C_aa_139-227	YMR243C_idr_2	4	NA
258	YOR316C_aa_139-237	YOR316C_idr_2	4	NA
259	YBR140C_aa_2297-2327	YBR140C_idr_26	4	NA
260	YGR100W_aa_858-950	YGR100W_idr_9	4	NA
261	YDL148C_aa_171-203	YDL148C_idr_18	4	NA
262	YDL150W_aa_98-195	YDL150W_idr_4	4	NA
263	YDR365C_aa_370-408	YDR365C_idr_7	4	NA
264	YNL242W_aa_1420-1491	YNL242W_idr_19	4	NA
265	YDL065C_aa_1-68	YDL065C_idr_1	4	NA
266	YDL195W_aa_474-503	YDL195W_idr_3	4	NA
267	YGR116W_aa_256-298	YGR116W_idr_10	4	NA
268	YPL207W_aa_369-421	YPL207W_idr_5	4	NA
269	YOL021C_aa_328-360	YOL021C_idr_4	4	NA
270	YOR341W_aa_142-175	YOR341W_idr_18	4	NA
271	YDR301W_aa_442-491	YDR301W_idr_6	5	A
272	YDR325W_aa_493-569	YDR325W_idr_5	5	A
273	YBL014C_aa_71-100	YBL014C_idr_10	5	A
274	YBR237W_aa_148-192	YBR237W_idr_4	5	A
275	YDL060W_aa_317-487	YDL060W_idr_2	5	A
276	YGR013W_aa_324-360	YGR013W_idr_7	5	A
277	YLR398C_aa_206-293	YLR398C_idr_11	5	A
278	YAL001C_aa_267-322	YAL001C_idr_2	5	A
279	YCR081W_aa_1037-1071	YCR081W_idr_17	5	A
280	YJR042W_aa_1-59	YJR042W_idr_1	5	A
281	YFL007W_aa_179-216	YFL007W_idr_20	5	A
282	YKR025W_aa_1-66	YKR025W_idr_1	5	A
283	YDR299W_aa_502-533	YDR299W_idr_3	5	A
284	YNR031C_aa_280-321	YNR031C_idr_12	5	A
285	YER025W_aa_1-69	YER025W_idr_1	5	A
286	YDL145C_aa_811-895	YDL145C_idr_2	5	A
287	YLR196W_aa_37-103	YLR196W_idr_1	5	A
288	YNL088W_aa_1062-1107	YNL088W_idr_15	5	A
289	YMR131C_aa_1-92	YMR131C_idr_1	5	A
290	YHR196W_aa_516-575	YHR196W_idr_6	5	A
291	YOR370C_aa_566-603	YOR370C_idr_2	5	A
292	YDR333C_aa_11-183	YDR333C_idr_5	5	A
293	YJL050W_aa_1-108	YJL050W_idr_1	5	A
294	YDL148C_aa_288-372	YDL148C_idr_6	5	A
295	YDR152W_aa_234-265	YDR152W_idr_5	5	A
296	YOR304W_aa_806-875	YOR304W_idr_8	5	A
297	YML093W_aa_479-749	YML093W_idr_3	5	A
298	YDL153C_aa_43-118	YDL153C_idr_10	5	A
299	YGL244W_aa_1-110	YGL244W_idr_1	5	A
300	YML093W_aa_1-238	YML093W_idr_1	5	A
301	YHR069C_aa_18-48	YHR069C_idr_2	5	A
302	YDR299W_aa_16-56	YDR299W_idr_4	5	A
303	YMR309C_aa_1-67	YMR309C_idr_1	5	A
304	YBR095C_aa_401-430	YBR095C_idr_7	5	A
305	YOL009C_aa_69-115	YOL009C_idr_2	5	A
306	YGL008C_aa_1-53	YGL008C_idr_1	5	A
307	YAL025C_aa_226-306	YAL025C_idr_3	5	A
308	YDL031W_aa_1-131	YDL031W_idr_1	5	A
309	YMR229C_aa_1334-1459	YMR229C_idr_11	5	A
310	YCL054W_aa_417-655	YCL054W_idr_6	5	A
311	YMR229C_aa_159-198	YMR229C_idr_16	5	A
312	YDL153C_aa_304-443	YDL153C_idr_15	5	A
313	YOR287C_aa_6-46	YOR287C_idr_2	5	A
314	YLR002C_aa_90-126	YLR002C_idr_2	5	A
315	YLR435W_aa_144-205	YLR435W_idr_2	5	A
316	YBR081C_aa_553-733	YBR081C_idr_9	5	A
317	YDR068W_aa_242-310	YDR068W_idr_4	5	A
318	YDR138W_aa_607-752	YDR138W_idr_7	5	A
319	YDR176W_aa_96-224	YDR176W_idr_2	5	A
320	YGR252W_aa_1-75	YGR252W_idr_1	5	A
321	YGL228W_aa_528-577	YGL228W_idr_4	5	A
322	YDR163W_aa_50-79	YDR163W_idr_4	5	A
323	YBR216C_aa_130-168	YBR216C_idr_3	5	A
324	YGL060W_aa_100-135	YGL060W_idr_2	5	A
325	YAL013W_aa_1-174	YAL013W_idr_1	5	A
326	YLR033W_aa_328-383	YLR033W_idr_3	5	A
327	YLR283W_aa_283-314	YLR283W_idr_4	5	A
328	YBR279W_aa_355-445	YBR279W_idr_6	5	A
329	YDR465C_aa_153-189	YDR465C_idr_4	5	A
330	YNL166C_aa_132-204	YNL166C_idr_5	5	A
331	YNL224C_aa_145-239	YNL224C_idr_10	5	A
332	YOL144W_aa_262-338	YOL144W_idr_4	5	A
333	YCR048W_aa_32-82	YCR048W_idr_2	5	A
334	YIR003W_aa_533-647	YIR003W_idr_3	5	A
335	YIR003W_aa_1-447	YIR003W_idr_1	5	A
336	YFR016C_aa_228-1139	YFR016C_idr_3	5	A
337	YGR229C_aa_344-505	YGR229C_idr_5	5	A
338	YKL195W_aa_69-287	YKL195W_idr_3	5	A
339	YDL099W_aa_1-249	YDL099W_idr_1	5	A
340	YOR239W_aa_1-337	YOR239W_idr_1	5	A
341	YLR330W_aa_270-671	YLR330W_idr_3	5	A
342	YDR330W_aa_371-408	YDR330W_idr_7	5	A
343	YLR181C_aa_169-289	YLR181C_idr_2	5	A
344	YMR192W_aa_1-259	YMR192W_idr_1	5	A
345	YPL249C_aa_1-418	YPL249C_idr_1	5	A
346	YDR117C_aa_182-235	YDR117C_idr_3	5	A
347	YGL137W_aa_827-889	YGL137W_idr_3	5	A
348	YDR488C_aa_89-126	YDR488C_idr_3	5	A
349	YHR197W_aa_621-763	YHR197W_idr_7	5	A
350	YNR038W_aa_1-162	YNR038W_idr_1	5	A
351	YMR213W_aa_382-433	YMR213W_idr_11	5	A
352	YAL059W_aa_168-212	YAL059W_idr_3	5	A
353	YPL022W_aa_1-71	YPL022W_idr_1	5	A
354	YDR121W_aa_125-196	YDR121W_idr_2	5	A
355	YDR485C_aa_1-588	YDR485C_idr_1	5	A
356	YOL023W_aa_427-463	YOL023W_idr_3	5	A
357	YBR245C_aa_1060-1129	YBR245C_idr_5	5	A
358	YJL054W_aa_268-360	YJL054W_idr_4	5	A
359	YOR042W_aa_1-98	YOR042W_idr_1	5	A
360	YMR240C_aa_374-428	YMR240C_idr_4	5	A
361	YAL015C_aa_365-399	YAL015C_idr_4	5	A
362	YHR012W_aa_185-237	YHR012W_idr_1	5	A
363	YLR277C_aa_490-529	YLR277C_idr_2	5	A
364	YML069W_aa_182-216	YML069W_idr_2	5	A
365	YHR036W_aa_88-139	YHR036W_idr_4	5	A
366	YNL215W_aa_1-59	YNL215W_idr_1	5	A
367	YLR135W_aa_19-104	YLR135W_idr_6	5	A
368	YNR019W_aa_28-93	YNR019W_idr_2	5	A
369	YNL082W_aa_364-482	YNL082W_idr_3	5	A
370	YNL212W_aa_169-230	YNL212W_idr_3	5	A
371	YDR314C_aa_1-58	YDR314C_idr_1	5	A
372	YDR090C_aa_224-283	YDR090C_idr_2	5	A
373	YGL227W_aa_621-696	YGL227W_idr_15	5	A
374	YML049C_aa_894-948	YML049C_idr_2	5	A
375	YKL010C_aa_619-714	YKL010C_idr_9	5	A
376	YAL047C_aa_7-39	YAL047C_idr_3	5	A
377	YDR162C_aa_71-107	YDR162C_idr_2	5	A
378	YJL019W_aa_37-71	YJL019W_idr_2	5	A
379	YAR014C_aa_132-161	YAR014C_idr_20	5	A
380	YPR089W_aa_807-856	YPR089W_idr_7	5	A
381	YJL098W_aa_23-93	YJL098W_idr_5	5	A
382	YKR028W_aa_29-94	YKR028W_idr_3	5	A
383	YOR059C_aa_331-373	YOR059C_idr_2	5	A
384	YBL010C_aa_1-42	YBL010C_idr_1	5	A
385	YGR091W_aa_1-47	YGR091W_idr_1	5	A
386	YNL116W_aa_485-522	YNL116W_idr_3	5	A
387	YJR030C_aa_454-483	YJR030C_idr_2	5	A
388	YDL122W_aa_512-668	YDL122W_idr_8	5	A
389	YGR184C_aa_1829-1863	YGR184C_idr_21	5	A
390	YER173W_aa_582-659	YER173W_idr_7	5	A
391	YDL115C_aa_288-323	YDL115C_idr_6	5	A
392	YFL023W_aa_243-281	YFL023W_idr_15	5	A
393	YBL097W_aa_226-388	YBL097W_idr_9	5	A
394	YER162C_aa_669-754	YER162C_idr_8	5	A
395	YJL098W_aa_781-1058	YJL098W_idr_2	5	A
396	YKR028W_aa_772-1033	YKR028W_idr_9	5	A
397	YBL104C_aa_432-492	YBL104C_idr_7	5	A
398	YOL082W_aa_385-415	YOL082W_idr_6	5	A
399	YCR042C_aa_300-330	YCR042C_idr_18	5	A
400	YGL227W_aa_159-206	YGL227W_idr_9	5	A
401	YIL017C_aa_823-852	YIL017C_idr_9	5	A
402	YBR030W_aa_399-430	YBR030W_idr_3	5	A
403	YDR080W_aa_1-97	YDR080W_idr_1	5	A
404	YGL203C_aa_502-613	YGL203C_idr_2	5	A
405	YML059C_aa_262-313	YML059C_idr_13	5	A
406	YBL052C_aa_579-831	YBL052C_idr_2	5	A
407	YHR131C_aa_570-661	YHR131C_idr_3	5	A
408	YMR171C_aa_419-550	YMR171C_idr_7	5	A
409	YJR060W_aa_64-219	YJR060W_idr_3	5	A
410	YJL127C_aa_596-640	YJL127C_idr_8	5	A
411	YPL049C_aa_323-368	YPL049C_idr_5	5	A
412	YCR028C_aa_468-512	YCR028C_idr_2	5	A
413	YGR086C_aa_271-339	YGR086C_idr_2	5	A
414	YBR079C_aa_499-550	YBR079C_idr_6	5	A
415	YPL004C_aa_269-341	YPL004C_idr_2	5	A
416	YBR182C_aa_135-181	YBR182C_idr_16	5	A
417	YDR328C_aa_39-71	YDR328C_idr_2	5	A
418	YDR014W_aa_220-249	YDR014W_idr_5	5	A
419	YPL260W_aa_514-551	YPL260W_idr_5	5	A
420	YNL294C_aa_494-533	YNL294C_idr_4	5	A
421	YBR123C_aa_514-614	YBR123C_idr_5	5	A
422	YIR012W_aa_1-45	YIR012W_idr_1	5	A
423	YLL026W_aa_868-908	YLL026W_idr_3	5	A
424	YBL046W_aa_188-441	YBL046W_idr_5	5	A
425	YNL215W_aa_89-213	YNL215W_idr_3	5	A
426	YKL028W_aa_369-482	YKL028W_idr_5	5	A
427	YDR060W_aa_111-205	YDR060W_idr_6	5	A
428	YJL115W_aa_159-279	YJL115W_idr_2	5	A
429	YKL172W_aa_8-184	YKL172W_idr_2	5	A
430	YPL181W_aa_1-68	YPL181W_idr_1	5	A
431	YDR412W_aa_97-133	YDR412W_idr_3	5	A
432	YBR142W_aa_63-168	YBR142W_idr_6	5	A
433	YEL012W_aa_155-218	YEL012W_idr_2	5	A
434	YJR002W_aa_83-310	YJR002W_idr_3	5	A
435	YJR035W_aa_163-241	YJR035W_idr_2	5	A
436	YEL055C_aa_694-806	YEL055C_idr_3	5	A
437	YKL125W_aa_248-322	YKL125W_idr_2	5	A
438	YLL008W_aa_121-227	YLL008W_idr_6	5	A
439	YER172C_aa_201-280	YER172C_idr_20	5	A
440	YLR106C_aa_4038-4671	YLR106C_idr_100	5	A
441	YNL206C_aa_309-455	YNL206C_idr_5	5	A
442	YBR278W_aa_102-181	YBR278W_idr_2	5	A
443	YJL098W_aa_127-200	YJL098W_idr_6	5	A
444	YKR028W_aa_138-208	YKR028W_idr_5	5	A
445	YMR277W_aa_599-732	YMR277W_idr_5	5	A
446	YLR055C_aa_1-114	YLR055C_idr_1	5	A
447	YLL022C_aa_130-188	YLL022C_idr_4	5	A
448	YML062C_aa_242-392	YML062C_idr_6	5	A
449	YOR123C_aa_1-145	YOR123C_idr_1	5	A
450	YPL190C_aa_1-306	YPL190C_idr_1	5	A
451	YOR141C_aa_1-63	YOR141C_idr_1	5	A
452	YDL122W_aa_743-809	YDL122W_idr_9	5	A
453	YPR152C_aa_105-206	YPR152C_idr_5	5	A
454	YMR311C_aa_132-185	YMR311C_idr_3	5	A
455	YOL117W_aa_1-65	YOL117W_idr_1	5	A
456	YDR049W_aa_123-184	YDR049W_idr_4	5	A
457	YDR334W_aa_546-684	YDR334W_idr_3	5	A
458	YBL043W_aa_88-135	YBL043W_idr_4	5	A
459	YIL019W_aa_32-89	YIL019W_idr_2	5	A
460	YNL023C_aa_1-50	YNL023C_idr_1	5	A
461	YOR119C_aa_364-455	YOR119C_idr_4	5	A
462	YNL224C_aa_252-380	YNL224C_idr_11	5	A
463	YAR014C_aa_172-257	YAR014C_idr_3	5	A
464	YDL139C_aa_172-203	YDL139C_idr_6	5	A
465	YDR398W_aa_559-643	YDR398W_idr_2	5	A
466	YJL019W_aa_90-143	YJL019W_idr_4	5	A
467	YKL173W_aa_1-52	YKL173W_idr_1	5	A
468	YNL224C_aa_456-513	YNL224C_idr_13	5	A
469	YCR057C_aa_856-923	YCR057C_idr_2	5	A
470	YJL069C_aa_41-80	YJL069C_idr_2	5	A
471	YOR270C_aa_664-705	YOR270C_idr_5	5	A
472	YJL069C_aa_92-136	YJL069C_idr_4	5	A
473	YNL207W_aa_349-409	YNL207W_idr_3	5	A
474	YLR287C_aa_201-232	YLR287C_idr_3	5	A
475	YJL098W_aa_518-622	YJL098W_idr_8	5	A
476	YKR028W_aa_528-615	YKR028W_idr_8	5	A
477	YOR304W_aa_1-60	YOR304W_idr_1	5	A
478	YJR132W_aa_929-1001	YJR132W_idr_5	5	A
479	YLR310C_aa_1048-1106	YLR310C_idr_8	5	A
480	YOL017W_aa_595-671	YOL017W_idr_9	5	A
481	YDR229W_aa_315-453	YDR229W_idr_3	5	A
482	YGR196C_aa_1-606	YGR196C_idr_1	5	A
483	YGL158W_aa_38-110	YGL158W_idr_3	5	A
484	YDR057W_aa_498-532	YDR057W_idr_10	5	A
485	YDL002C_aa_161-203	YDL002C_idr_4	5	A
486	YDR346C_aa_206-236	YDR346C_idr_2	5	A
487	YMR219W_aa_132-1658	YMR219W_idr_4	5	A
488	YLR099W-A_aa_1-30	YLR099W-A_idr_1	5	A
489	YKR089C_aa_85-115	YKR089C_idr_3	5	A
490	YJR115W_aa_133-164	YJR115W_idr_4	5	A
491	YJL176C_aa_1-303	YJL176C_idr_1	5	A
492	YPL186C_aa_86-266	YPL186C_idr_4	5	A
493	YJR092W_aa_49-1069	YJR092W_idr_2	5	A
494	YGL250W_aa_1-41	YGL250W_idr_1	5	A
495	YLR189C_aa_103-182	YLR189C_idr_2	5	A
496	YCR017C_aa_225-254	YCR017C_idr_3	5	A
497	YPL216W_aa_933-989	YPL216W_idr_5	5	A
498	YJL065C_aa_123-167	YJL065C_idr_2	5	A
499	YDR170C_aa_1-250	YDR170C_idr_1	5	A
500	YMR227C_aa_317-435	YMR227C_idr_4	5	A
501	YOR006C_aa_218-309	YOR006C_idr_2	5	A
502	YLR114C_aa_481-764	YLR114C_idr_5	5	A
503	YMR227C_aa_485-578	YMR227C_idr_6	5	A
504	YBR081C_aa_186-442	YBR081C_idr_8	5	A
505	YMR119W_aa_430-496	YMR119W_idr_3	5	A
506	YAR014C_aa_386-455	YAR014C_idr_7	5	A
507	YKL033W_aa_781-841	YKL033W_idr_5	5	A
508	YDL207W_aa_4-41	YDL207W_idr_2	5	A
509	YGL133W_aa_570-656	YGL133W_idr_11	5	A
510	YKL100C_aa_512-587	YKL100C_idr_5	5	A
511	YNL008C_aa_486-533	YNL008C_idr_6	5	A
512	YPL043W_aa_229-285	YPL043W_idr_3	5	A
513	YNL227C_aa_379-545	YNL227C_idr_2	5	A
514	YBR247C_aa_71-123	YBR247C_idr_5	5	A
515	YBR231C_aa_1-104	YBR231C_idr_1	5	A
516	YOR211C_aa_130-181	YOR211C_idr_4	5	A
517	YPL217C_aa_380-749	YPL217C_idr_9	5	A
518	YML010W_aa_1-243	YML010W_idr_1	5	A
519	YAL019W_aa_373-559	YAL019W_idr_8	5	A
520	YER164W_aa_18-175	YER164W_idr_12	5	A
521	YHR077C_aa_780-1046	YHR077C_idr_5	5	A
522	YLR223C_aa_64-165	YLR223C_idr_8	5	A
523	YHR080C_aa_662-756	YHR080C_idr_2	5	A
524	YKR017C_aa_1-81	YKR017C_idr_1	5	A
525	YGR170W_aa_248-486	YGR170W_idr_13	5	A
526	YNL273W_aa_1075-1238	YNL273W_idr_4	5	A
527	YCL061C_aa_486-761	YCL061C_idr_12	5	A
528	YLR223C_aa_167-708	YLR223C_idr_9	5	A
529	YJR052W_aa_40-126	YJR052W_idr_3	5	A
530	YFR038W_aa_1-123	YFR038W_idr_1	5	A
531	YIL091C_aa_1-159	YIL091C_idr_1	5	A
532	YLR103C_aa_162-229	YLR103C_idr_6	5	A
533	YNR054C_aa_1-109	YNR054C_idr_1	5	A
534	YNL246W_aa_223-264	YNL246W_idr_3	5	A
535	YDR060W_aa_863-1009	YDR060W_idr_12	5	A
536	YNL124W_aa_1-111	YNL124W_idr_1	5	A
537	YDR299W_aa_85-164	YDR299W_idr_6	5	A
538	YMR128W_aa_122-377	YMR128W_idr_8	5	A
539	YNL212W_aa_361-416	YNL212W_idr_4	5	A
540	YNL186W_aa_24-348	YNL186W_idr_2	5	A
541	YGR258C_aa_293-722	YGR258C_idr_9	5	A
542	YAL043C_aa_484-572	YAL043C_idr_7	5	A
543	YLR449W_aa_63-117	YLR449W_idr_2	5	A
544	YML074C_aa_170-263	YML074C_idr_3	5	A
545	YGR245C_aa_544-637	YGR245C_idr_12	5	A
546	YMR049C_aa_1-154	YMR049C_idr_1	5	A
547	YFR033C_aa_19-59	YFR033C_idr_2	5	A
548	YOR206W_aa_137-173	YOR206W_idr_4	5	A
549	YDR054C_aa_187-295	YDR054C_idr_2	5	A
550	YKR048C_aa_367-413	YKR048C_idr_6	5	A
551	YNL151C_aa_168-251	YNL151C_idr_4	5	A
552	YPL263C_aa_508-569	YPL263C_idr_4	5	A
553	YHR027C_aa_629-661	YHR027C_idr_5	5	A
554	YPL193W_aa_182-222	YPL193W_idr_9	5	A
555	YOR206W_aa_673-710	YOR206W_idr_9	5	A
556	YBL034C_aa_975-1223	YBL034C_idr_5	5	A
557	YDR359C_aa_410-645	YDR359C_idr_11	5	A
558	YGR237C_aa_527-597	YGR237C_idr_3	5	A
559	YGL093W_aa_1-450	YGL093W_idr_1	5	A
560	YHR050W_aa_469-506	YHR050W_idr_2	5	A
561	YDR457W_aa_2388-2453	YDR457W_idr_30	5	A
562	YDL003W_aa_391-481	YDL003W_idr_4	5	A
563	YFR046C_aa_219-258	YFR046C_idr_6	5	A
564	YLR320W_aa_1-73	YLR320W_idr_1	5	A
565	YMR080C_aa_1-54	YMR080C_idr_1	5	A
566	YBR233W_aa_1-62	YBR233W_idr_1	5	A
567	YFR046C_aa_94-128	YFR046C_idr_2	5	A
568	YJL197W_aa_1113-1254	YJL197W_idr_9	5	A
569	YKL174C_aa_532-618	YKL174C_idr_2	5	A
570	YDR325W_aa_906-1035	YDR325W_idr_9	5	A
571	YJL197W_aa_1-96	YJL197W_idr_1	5	A
572	YDR390C_aa_551-636	YDR390C_idr_5	5	A
573	YLR133W_aa_503-536	YLR133W_idr_4	5	A
574	YNL062C_aa_86-125	YNL062C_idr_2	5	A
575	YOR352W_aa_37-89	YOR352W_idr_5	5	A
576	YPR133C_aa_1-149	YPR133C_idr_1	5	A
577	YOR110W_aa_365-413	YOR110W_idr_3	5	A
578	YNL242W_aa_95-158	YNL242W_idr_22	5	A
579	YDR168W_aa_466-506	YDR168W_idr_5	5	A
580	YGL133W_aa_1072-1127	YGL133W_idr_3	5	A
581	YBR081C_aa_77-175	YBR081C_idr_7	5	A
582	YER022W_aa_133-194	YER022W_idr_10	5	A
583	YJL197W_aa_709-906	YJL197W_idr_7	5	A
584	YCL061C_aa_69-122	YCL061C_idr_8	5	A
585	YNL223W_aa_389-423	YNL223W_idr_6	5	A
586	YIL071C_aa_409-444	YIL071C_idr_3	5	A
587	YMR054W_aa_710-764	YMR054W_idr_4	5	A
588	YLR272C_aa_457-515	YLR272C_idr_3	5	A
589	YMR304W_aa_1076-1112	YMR304W_idr_5	5	A
590	YNL237W_aa_423-459	YNL237W_idr_5	5	A
591	YLR130C_aa_131-259	YLR130C_idr_4	5	A
592	YGR099W_aa_362-428	YGR099W_idr_2	5	A
593	YHR122W_aa_53-98	YHR122W_idr_3	5	A
594	YKL112W_aa_607-642	YKL112W_idr_9	5	A
595	YER038C_aa_43-85	YER038C_idr_2	5	A
596	YLR260W_aa_486-549	YLR260W_idr_5	5	A
597	YPR189W_aa_343-398	YPR189W_idr_2	5	A
598	YLR247C_aa_795-856	YLR247C_idr_11	5	A
599	YMR100W_aa_225-271	YMR100W_idr_9	5	A
600	YNL065W_aa_1-86	YNL065W_idr_1	5	A
601	YDL150W_aa_207-291	YDL150W_idr_6	6	B
602	YDR393W_aa_346-398	YDR393W_idr_7	6	B
603	YKR096W_aa_909-945	YKR096W_idr_3	6	B
604	YJL102W_aa_714-763	YJL102W_idr_10	6	B
605	YBR284W_aa_90-125	YBR284W_idr_5	6	B
606	YPR184W_aa_617-647	YPR184W_idr_6	6	B
607	YBR028C_aa_1-40	YBR028C_idr_1	6	B
608	YDR283C_aa_1496-1535	YDR283C_idr_13	6	B
609	YDR335W_aa_1168-1224	YDR335W_idr_8	6	B
610	YGR258C_aa_127-183	YGR258C_idr_3	6	B
611	YDR093W_aa_1064-1106	YDR093W_idr_7	6	B
612	YHR077C_aa_302-371	YHR077C_idr_3	6	B
613	YGL045W_aa_509-542	YGL045W_idr_7	6	B
614	YJR033C_aa_800-832	YJR033C_idr_2	6	B
615	YNL297C_aa_984-1020	YNL297C_idr_14	6	B
616	YHR099W_aa_2481-2519	YHR099W_idr_37	6	B
617	YDR457W_aa_1400-1432	YDR457W_idr_14	6	B
618	YOR228C_aa_7-46	YOR228C_idr_2	6	B
619	YGL186C_aa_1-49	YGL186C_idr_1	6	B
620	YLR024C_aa_1196-1245	YLR024C_idr_17	6	B
621	YJL080C_aa_1074-1126	YJL080C_idr_4	6	B
622	YFL040W_aa_499-540	YFL040W_idr_3	6	B
623	YMR165C_aa_91-242	YMR165C_idr_2	6	B
624	YKL092C_aa_811-918	YKL092C_idr_3	6	B
625	YDR034C_aa_575-609	YDR034C_idr_4	6	B
626	YDR104C_aa_1149-1191	YDR104C_idr_5	6	B
627	YFR029W_aa_179-214	YFR029W_idr_3	6	B
628	YGL161C_aa_32-87	YGL161C_idr_3	6	B
629	YCL025C_aa_70-112	YCL025C_idr_2	6	B
630	YKR100C_aa_69-109	YKR100C_idr_5	6	B
631	YDL106C_aa_292-331	YDL106C_idr_4	6	B
632	YDR508C_aa_91-142	YDR508C_idr_2	6	B
633	YEL061C_aa_1-33	YEL061C_idr_1	6	B
634	YPL259C_aa_231-266	YPL259C_idr_2	6	B
635	YDR320C_aa_1-139	YDR320C_idr_1	6	B
636	YPR097W_aa_353-462	YPR097W_idr_5	6	B
637	YGL150C_aa_1452-1489	YGL150C_idr_13	6	B
638	YDR311W_aa_117-170	YDR311W_idr_11	6	B
639	YHR096C_aa_1-71	YHR096C_idr_1	6	B
640	YOL004W_aa_1449-1536	YOL004W_idr_7	6	B
641	YER022W_aa_33-90	YER022W_idr_8	6	B
642	YOR057W_aa_284-336	YOR057W_idr_2	6	B
643	YBR138C_aa_268-302	YBR138C_idr_10	6	B
644	YGL073W_aa_1-40	YGL073W_idr_1	6	B
645	YGL251C_aa_949-1029	YGL251C_idr_10	6	B
646	YER157W_aa_470-523	YER157W_idr_5	6	B
647	YNL123W_aa_1-65	YNL123W_idr_1	6	B
648	YDR285W_aa_26-97	YDR285W_idr_12	6	B
649	YKR095W_aa_496-525	YKR095W_idr_16	6	B
650	YER056C_aa_1-52	YER056C_idr_1	6	B
651	YLR237W_aa_517-598	YLR237W_idr_4	6	B
652	YDR508C_aa_1-72	YDR508C_idr_1	6	B
653	YNR032W_aa_310-368	YNR032W_idr_1	6	B
654	YMR104C_aa_139-196	YMR104C_idr_3	6	B
655	YOL078W_aa_783-840	YOL078W_idr_2	6	B
656	YNL262W_aa_1970-2000	YNL262W_idr_21	6	B
657	YDR372C_aa_1-63	YDR372C_idr_1	6	B
658	YLR276C_aa_337-377	YLR276C_idr_2	6	B
659	YLL001W_aa_616-659	YLL001W_idr_6	6	B
660	YJL165C_aa_305-496	YJL165C_idr_2	6	B
661	YDR046C_aa_1-51	YDR046C_idr_1	6	B
662	YHR048W_aa_1-47	YHR048W_idr_1	6	B
663	YLR413W_aa_645-675	YLR413W_idr_5	6	B
664	YGR149W_aa_389-432	YGR149W_idr_4	6	B
665	YHR099W_aa_164-224	YHR099W_idr_34	6	B
666	YKR039W_aa_1-51	YKR039W_idr_1	6	B
667	YML116W_aa_1-62	YML116W_idr_1	6	B
668	YMR034C_aa_391-434	YMR034C_idr_2	6	B
669	YGL077C_aa_1-46	YGL077C_idr_1	6	B
670	YLR182W_aa_675-711	YLR182W_idr_2	6	B
671	YLR398C_aa_1-36	YLR398C_idr_1	6	B
672	YLR454W_aa_2008-2068	YLR454W_idr_31	6	B
673	YER060W-A_aa_1-49	YER060W-A_idr_1	6	B
674	YIL120W_aa_1-55	YIL120W_idr_1	6	B
675	YNL270C_aa_1-63	YNL270C_idr_1	6	B
676	YKR095W_aa_305-382	YKR095W_idr_3	6	B
677	YLL040C_aa_846-924	YLL040C_idr_13	6	B
678	YMR306W_aa_776-838	YMR306W_idr_8	6	B
679	YHL036W_aa_1-57	YHL036W_idr_1	6	B
680	YKL178C_aa_430-470	YKL178C_idr_5	6	B
681	YPL224C_aa_62-122	YPL224C_idr_6	6	B
682	YDL235C_aa_98-129	YDL235C_idr_2	6	B
683	YPL009C_aa_712-929	YPL009C_idr_10	6	B
684	YDR068W_aa_1-39	YDR068W_idr_1	6	B
685	YGL077C_aa_527-563	YGL077C_idr_2	6	B
686	YJR140C_aa_270-376	YJR140C_idr_25	6	B
687	YDR135C_aa_855-931	YDR135C_idr_3	6	B
688	YGR191W_aa_18-82	YGR191W_idr_3	6	B
689	YKR067W_aa_683-743	YKR067W_idr_3	6	B
690	YER049W_aa_293-326	YER049W_idr_14	6	B
691	YLL034C_aa_88-140	YLL034C_idr_12	6	B
692	YMR290C_aa_1-38	YMR290C_idr_1	6	B
693	YNL292W_aa_367-403	YNL292W_idr_2	6	B
694	YOL097C_aa_1-30	YOL097C_idr_1	6	B
695	YDR028C_aa_1-73	YDR028C_idr_1	6	B
696	YBL097W_aa_109-158	YBL097W_idr_8	6	B
697	YMR128W_aa_945-984	YMR128W_idr_14	6	B
698	YPR190C_aa_387-447	YPR190C_idr_4	6	B
699	YHR182W_aa_170-202	YHR182W_idr_2	6	B
700	YLR247C_aa_1500-1549	YLR247C_idr_21	6	B
701	YBL023C_aa_708-751	YBL023C_idr_8	6	B
702	YDR299W_aa_345-400	YDR299W_idr_9	6	B
703	YJR014W_aa_49-92	YJR014W_idr_2	6	B
704	YDR312W_aa_379-453	YDR312W_idr_4	6	B
705	YOL004W_aa_1028-1131	YOL004W_idr_14	6	B
706	YNL308C_aa_176-208	YNL308C_idr_7	6	B
707	YPL043W_aa_106-141	YPL043W_idr_2	6	B
708	YHR034C_aa_181-223	YHR034C_idr_2	6	B
709	YPL022W_aa_542-683	YPL022W_idr_5	6	B
710	YNL059C_aa_373-429	YNL059C_idr_6	6	B
711	YLL034C_aa_32-61	YLL034C_idr_10	6	B
712	YPL023C_aa_307-378	YPL023C_idr_1	6	B
713	YJL071W_aa_318-347	YJL071W_idr_3	6	B
714	YGL141W_aa_443-493	YGL141W_idr_3	6	B
715	YLR419W_aa_801-833	YLR419W_idr_15	6	B
716	YML104C_aa_572-705	YML104C_idr_5	6	B
717	YOL089C_aa_852-924	YOL089C_idr_11	6	B
718	YGL233W_aa_780-812	YGL233W_idr_6	6	B
719	YIL077C_aa_270-302	YIL077C_idr_5	6	B
720	YIL030C_aa_1-37	YIL030C_idr_1	6	B
721	YJR106W_aa_207-252	YJR106W_idr_4	6	B
722	YDR170C_aa_428-496	YDR170C_idr_15	6	B
723	YLR032W_aa_356-431	YLR032W_idr_10	6	B
724	YIL140W_aa_596-655	YIL140W_idr_7	6	B
725	YNL242W_aa_225-288	YNL242W_idr_25	6	B
726	YBR081C_aa_756-844	YBR081C_idr_10	6	B
727	YJL059W_aa_180-215	YJL059W_idr_2	6	B
728	YOR154W_aa_343-430	YOR154W_idr_5	6	B
729	YMR165C_aa_590-623	YMR165C_idr_5	6	B
730	YJL013C_aa_214-283	YJL013C_idr_2	6	B
731	YLR135W_aa_280-322	YLR135W_idr_9	6	B
732	YNL193W_aa_202-242	YNL193W_idr_2	6	B
733	YGL144C_aa_656-685	YGL144C_idr_8	6	B
734	YPR089W_aa_219-258	YPR089W_idr_4	6	B
735	YJL070C_aa_173-211	YJL070C_idr_7	6	B
736	YER093C_aa_182-300	YER093C_idr_7	6	B
737	YNL008C_aa_576-618	YNL008C_idr_8	6	B
738	YOR371C_aa_126-176	YOR371C_idr_5	6	B
739	YJR134C_aa_458-588	YJR134C_idr_6	6	B
740	YPR095C_aa_625-674	YPR095C_idr_14	6	B
741	YOL045W_aa_656-833	YOL045W_idr_3	6	B
742	YDR334W_aa_423-519	YDR334W_idr_17	6	B
743	YLR004C_aa_1-61	YLR004C_idr_1	6	B
744	YIL031W_aa_56-97	YIL031W_idr_4	6	B
745	YOR171C_aa_454-498	YOR171C_idr_6	6	B
746	YLR256W_aa_1064-1098	YLR256W_idr_6	6	B
747	YLR419W_aa_412-450	YLR419W_idr_12	6	B
748	YOL075C_aa_981-1010	YOL075C_idr_9	6	B
749	YIR002C_aa_1-71	YIR002C_idr_1	7	NA
750	YJL012C_aa_492-577	YJL012C_idr_5	7	NA
751	YKL039W_aa_457-523	YKL039W_idr_4	7	NA
752	YIR002C_aa_948-993	YIR002C_idr_7	7	NA
753	YDR128W_aa_542-610	YDR128W_idr_4	7	NA
754	YDR326C_aa_761-845	YDR326C_idr_4	7	NA
755	YCL034W_aa_299-354	YCL034W_idr_4	7	NA
756	YDR283C_aa_667-767	YDR283C_idr_21	7	NA
757	YDR072C_aa_359-408	YDR072C_idr_3	7	NA
758	YPL158C_aa_504-574	YPL158C_idr_7	7	NA
759	YHR150W_aa_100-159	YHR150W_idr_3	7	NA
760	YOR260W_aa_548-578	YOR260W_idr_9	7	NA
761	YNL172W_aa_1194-1234	YNL172W_idr_5	7	NA
762	YPR075C_aa_144-185	YPR075C_idr_6	7	NA
763	YDR343C_aa_1-51	YDR343C_idr_1	7	NA
764	YHR094C_aa_1-50	YHR094C_idr_1	7	NA
765	YLL040C_aa_1342-1395	YLL040C_idr_19	7	NA
766	YAL017W_aa_409-449	YAL017W_idr_11	7	NA
767	YOL045W_aa_241-270	YOL045W_idr_5	7	NA
768	YKL014C_aa_739-783	YKL014C_idr_3	7	NA
769	YPL126W_aa_794-858	YPL126W_idr_4	7	NA
770	YDL231C_aa_1037-1085	YDL231C_idr_10	7	NA
771	YGR113W_aa_160-217	YGR113W_idr_2	7	NA
772	YFL034W_aa_225-276	YFL034W_idr_6	7	NA
773	YML037C_aa_219-340	YML037C_idr_7	7	NA
774	YOR042W_aa_322-411	YOR042W_idr_5	7	NA
775	YPR162C_aa_1-45	YPR162C_idr_1	7	NA
776	YDR254W_aa_286-373	YDR254W_idr_3	7	NA
777	YHR119W_aa_566-770	YHR119W_idr_11	7	NA
778	YPL146C_aa_268-333	YPL146C_idr_11	7	NA
779	YDR083W_aa_12-109	YDR083W_idr_3	7	NA
780	YPL228W_aa_1-245	YPL228W_idr_1	7	NA
781	YML061C_aa_128-188	YML061C_idr_13	7	NA
782	YBL079W_aa_795-838	YBL079W_idr_3	8	NA
783	YBR140C_aa_1324-1360	YBR140C_idr_11	8	NA
784	YGL180W_aa_836-868	YGL180W_idr_7	8	NA
785	YKL015W_aa_783-932	YKL015W_idr_3	8	NA
786	YOR022C_aa_144-180	YOR022C_idr_5	8	NA
787	YBR207W_aa_41-119	YBR207W_idr_2	8	NA
788	YDL206W_aa_212-278	YDL206W_idr_3	8	NA
789	YAL022C_aa_1-66	YAL022C_idr_1	8	NA
790	YGL151W_aa_39-76	YGL151W_idr_6	8	NA
791	YNL106C_aa_118-157	YNL106C_idr_3	8	NA
792	YKR078W_aa_253-295	YKR078W_idr_4	8	NA
793	YOR147W_aa_354-383	YOR147W_idr_3	8	NA
794	YPL019C_aa_233-287	YPL019C_idr_4	8	NA
795	YFR048W_aa_240-413	YFR048W_idr_6	8	NA
796	YJR090C_aa_1120-1151	YJR090C_idr_5	8	NA
797	YLR182W_aa_164-247	YLR182W_idr_9	8	NA
798	YJR127C_aa_916-946	YJR127C_idr_10	8	NA
799	YBR163W_aa_403-453	YBR163W_idr_6	8	NA
800	YIL026C_aa_1066-1150	YIL026C_idr_6	8	NA
801	YGR128C_aa_418-448	YGR128C_idr_9	8	NA
802	YHL017W_aa_454-532	YHL017W_idr_4	8	NA
803	YGR056W_aa_816-903	YGR056W_idr_2	8	NA
804	YKR031C_aa_572-606	YKR031C_idr_15	8	NA
805	YDR017C_aa_975-1022	YDR017C_idr_4	8	NA
806	YER111C_aa_977-1029	YER111C_idr_10	8	NA
807	YMR302C_aa_601-643	YMR302C_idr_3	8	NA
808	YPL254W_aa_343-400	YPL254W_idr_6	8	NA
809	YAL047C_aa_218-281	YAL047C_idr_6	8	NA
810	YNR023W_aa_180-244	YNR023W_idr_11	8	NA
811	YPR135W_aa_785-820	YPR135W_idr_9	8	NA
812	YKL038W_aa_716-762	YKL038W_idr_8	8	NA
813	YBR049C_aa_571-686	YBR049C_idr_2	8	NA
814	YPR089W_aa_445-505	YPR089W_idr_5	8	NA
815	YNL216W_aa_1-73	YNL216W_idr_1	8	NA
816	YHR099W_aa_2041-2089	YHR099W_idr_27	8	NA
817	YOR022C_aa_241-342	YOR022C_idr_8	8	NA
818	YDR297W_aa_318-349	YDR297W_idr_3	8	NA
819	YGL133W_aa_798-854	YGL133W_idr_12	8	NA
820	YPL015C_aa_301-357	YPL015C_idr_2	8	NA
821	YPL132W_aa_261-300	YPL132W_idr_3	8	NA
822	YKR095W_aa_1542-1627	YKR095W_idr_64	8	NA
823	YNR019W_aa_154-204	YNR019W_idr_4	8	NA
824	YNL156C_aa_39-105	YNL156C_idr_2	8	NA
825	YOR191W_aa_415-480	YOR191W_idr_2	8	NA
826	YOR346W_aa_244-312	YOR346W_idr_8	8	NA
827	YPR055W_aa_284-318	YPR055W_idr_7	8	NA
828	YMR304W_aa_688-769	YMR304W_idr_15	8	NA
829	YDL240W_aa_966-1017	YDL240W_idr_2	8	NA
830	YOR124C_aa_1097-1159	YOR124C_idr_13	8	NA
831	YMR136W_aa_509-560	YMR136W_idr_4	8	NA
832	YOR191W_aa_755-796	YOR191W_idr_13	8	NA
833	YFR001W_aa_167-204	YFR001W_idr_3	9	C
834	YDL030W_aa_354-392	YDL030W_idr_8	9	C
835	YDR156W_aa_107-137	YDR156W_idr_3	9	C
836	YML057W_aa_455-495	YML057W_idr_11	9	C
837	YFR038W_aa_150-205	YFR038W_idr_7	9	C
838	YDL213C_aa_1-73	YDL213C_idr_1	9	C
839	YIL075C_aa_809-864	YIL075C_idr_9	9	C
840	YHR196W_aa_338-384	YHR196W_idr_4	9	C
841	YBR267W_aa_62-154	YBR267W_idr_5	9	C
842	YHL013C_aa_73-142	YHL013C_idr_3	9	C
843	YIL112W_aa_1-67	YIL112W_idr_1	9	C
844	YAL035W_aa_203-398	YAL035W_idr_4	9	C
845	YOR048C_aa_404-596	YOR048C_idr_7	9	C
846	YGR013W_aa_443-495	YGR013W_idr_8	9	C
847	YCR016W_aa_212-250	YCR016W_idr_4	9	C
848	YLR401C_aa_223-277	YLR401C_idr_5	9	C
849	YBR122C_aa_112-145	YBR122C_idr_2	9	C
850	YPR112C_aa_294-340	YPR112C_idr_3	9	C
851	YMR077C_aa_179-221	YMR077C_idr_5	9	C
852	YBL024W_aa_415-453	YBL024W_idr_2	9	C
853	YBL058W_aa_303-344	YBL058W_idr_7	9	C
854	YDR168W_aa_187-228	YDR168W_idr_4	9	C
855	YER030W_aa_1-38	YER030W_idr_1	9	C
856	YDR148C_aa_152-235	YDR148C_idr_2	9	C
857	YNL071W_aa_117-169	YNL071W_idr_2	9	C
858	YKL081W_aa_215-253	YKL081W_idr_2	9	C
859	YNR022C_aa_85-124	YNR022C_idr_2	9	C
860	YDL150W_aa_318-351	YDL150W_idr_7	9	C
861	YFR013W_aa_652-694	YFR013W_idr_7	9	C
862	YCR004C_aa_207-244	YCR004C_idr_2	9	C
863	YER128W_aa_100-133	YER128W_idr_2	9	C
864	YIL063C_aa_1-201	YIL063C_idr_1	9	C
865	YDR002W_aa_1-74	YDR002W_idr_1	9	C
866	YOR046C_aa_1-79	YOR046C_idr_1	9	C
867	YGR193C_aa_116-162	YGR193C_idr_2	9	C
868	YJL123C_aa_21-150	YJL123C_idr_3	9	C
869	YER151C_aa_217-448	YER151C_idr_3	9	C
870	YLR429W_aa_401-611	YLR429W_idr_2	9	C
871	YNR051C_aa_148-414	YNR051C_idr_2	9	C
872	YPR148C_aa_321-374	YPR148C_idr_7	9	C
873	YKL012W_aa_76-123	YKL012W_idr_1	9	C
874	YGR281W_aa_510-589	YGR281W_idr_15	9	C
875	YBR169C_aa_643-693	YBR169C_idr_4	9	C
876	YCL043C_aa_491-522	YCL043C_idr_2	9	C
877	YKL082C_aa_69-171	YKL082C_idr_9	9	C
878	YOL041C_aa_1-145	YOL041C_idr_1	9	C
879	YNL061W_aa_1-141	YNL061W_idr_1	9	C
880	YOR078W_aa_1-59	YOR078W_idr_1	9	C
881	YJL148W_aa_185-233	YJL148W_idr_2	9	C
882	YGR280C_aa_144-246	YGR280C_idr_4	9	C
883	YMR269W_aa_110-211	YMR269W_idr_5	9	C
884	YGL078C_aa_1-60	YGL078C_idr_1	9	C
885	YLR197W_aa_423-504	YLR197W_idr_2	9	C
886	YOR310C_aa_411-511	YOR310C_idr_1	9	C
887	YLR175W_aa_391-483	YLR175W_idr_3	9	C
888	YLR449W_aa_170-278	YLR449W_idr_3	9	C
889	YDL051W_aa_221-275	YDL051W_idr_2	9	C
890	YOR004W_aa_209-254	YOR004W_idr_3	9	C
891	YJR035W_aa_910-949	YJR035W_idr_9	9	C
892	YMR012W_aa_138-196	YMR012W_idr_19	9	C
893	YMR089C_aa_112-171	YMR089C_idr_6	9	C
894	YMR227C_aa_1-87	YMR227C_idr_1	9	C
895	YJL125C_aa_285-335	YJL125C_idr_2	9	C
896	YPL212C_aa_1-67	YPL212C_idr_1	9	C
897	YDR060W_aa_1-49	YDR060W_idr_1	9	C
898	YER164W_aa_1211-1247	YER164W_idr_8	9	C
899	YDR052C_aa_325-654	YDR052C_idr_7	9	C
900	YHR119W_aa_355-405	YHR119W_idr_8	9	C
901	YGR130C_aa_756-801	YGR130C_idr_5	9	C
902	YBR079C_aa_809-964	YBR079C_idr_3	9	C
903	YDL212W_aa_174-210	YDL212W_idr_3	9	C
904	YBR172C_aa_283-635	YBR172C_idr_4	9	C
905	YPL105C_aa_226-744	YPL105C_idr_2	9	C
906	YGR054W_aa_453-599	YGR054W_idr_3	9	C
907	YJR043C_aa_126-162	YJR043C_idr_2	9	C
908	YLL027W_aa_42-140	YLL027W_idr_4	9	C
909	YLR450W_aa_1015-1045	YLR450W_idr_7	9	C
910	YML075C_aa_1019-1054	YML075C_idr_6	9	C
911	YDR464W_aa_653-787	YDR464W_idr_4	9	C
912	YDR464W_aa_1200-1330	YDR464W_idr_9	9	C
913	YLR145W_aa_160-201	YLR145W_idr_6	9	C
914	YBL008W_aa_430-479	YBL008W_idr_1	9	C
915	YKR023W_aa_71-158	YKR023W_idr_4	9	C
916	YPR104C_aa_387-459	YPR104C_idr_4	9	C
917	YOR038C_aa_382-477	YOR038C_idr_3	9	C
918	YBR054W_aa_315-344	YBR054W_idr_4	9	C
919	YMR137C_aa_173-209	YMR137C_idr_3	9	C
920	YAL011W_aa_180-449	YAL011W_idr_3	9	C
921	YIL010W_aa_1-59	YIL010W_idr_1	9	C
922	YMR114C_aa_260-368	YMR114C_idr_2	9	C
923	YHR146W_aa_97-465	YHR146W_idr_2	9	C
924	YNL173C_aa_194-359	YNL173C_idr_4	9	C
925	YMR031C_aa_705-843	YMR031C_idr_10	9	C
926	YNL173C_aa_98-186	YNL173C_idr_2	9	C
927	YFR013W_aa_1-133	YFR013W_idr_1	9	C
928	YGR072W_aa_241-329	YGR072W_idr_5	9	C
929	YMR233W_aa_75-117	YMR233W_idr_3	9	C
930	YDR440W_aa_83-185	YDR440W_idr_2	9	C
931	YOL017W_aa_49-122	YOL017W_idr_13	9	C
932	YLR455W_aa_111-201	YLR455W_idr_2	9	C
933	YJL092W_aa_1129-1172	YJL092W_idr_4	9	C
934	YKL023W_aa_224-277	YKL023W_idr_4	9	C
935	YMR239C_aa_1-36	YMR239C_idr_1	9	C
936	YGR072W_aa_333-387	YGR072W_idr_6	9	C
937	YNL035C_aa_357-389	YNL035C_idr_2	9	C
938	YDR033W_aa_278-320	YDR033W_idr_5	9	C
939	YBR215W_aa_1-449	YBR215W_idr_1	9	C
940	YKL050C_aa_774-860	YKL050C_idr_11	9	C
941	YLR372W_aa_310-345	YLR372W_idr_4	9	C
942	YPL127C_aa_1-44	YPL127C_idr_1	9	C
943	YPL127C_aa_117-181	YPL127C_idr_2	9	C
944	YLR039C_aa_962-996	YLR039C_idr_7	9	C
945	YOL108C_aa_1-42	YOL108C_idr_1	9	C
946	YLL001W_aa_548-581	YLL001W_idr_5	9	C
947	YNL175C_aa_1-77	YNL175C_idr_1	9	C
948	YBR029C_aa_1-55	YBR029C_idr_1	9	C
949	YFR041C_aa_252-295	YFR041C_idr_3	9	C
950	YPL207W_aa_161-198	YPL207W_idr_4	9	C
951	YGL006W_aa_239-278	YGL006W_idr_2	9	C
952	YNL132W_aa_1005-1056	YNL132W_idr_3	9	C
953	YCR047C_aa_207-238	YCR047C_idr_2	9	C
954	YER013W_aa_240-296	YER013W_idr_17	9	C
955	YAL019W_aa_317-351	YAL019W_idr_5	9	C
956	YGR048W_aa_206-245	YGR048W_idr_2	9	C
957	YGR274C_aa_259-317	YGR274C_idr_19	9	C
958	YKL078W_aa_1-69	YKL078W_idr_1	9	C
959	YMR140W_aa_168-250	YMR140W_idr_2	9	C
960	YAL001C_aa_415-555	YAL001C_idr_3	9	C
961	YOR004W_aa_178-207	YOR004W_idr_2	9	C
962	YBR237W_aa_28-135	YBR237W_idr_2	9	C
963	YDR088C_aa_344-382	YDR088C_idr_7	9	C
964	YFL004W_aa_558-638	YFL004W_idr_7	9	C
965	YPL019C_aa_564-644	YPL019C_idr_5	9	C
966	YGR145W_aa_653-707	YGR145W_idr_7	9	C
967	YLR323C_aa_1-47	YLR323C_idr_1	9	C
968	YDR386W_aa_85-131	YDR386W_idr_2	9	C
969	YJL203W_aa_237-280	YJL203W_idr_3	9	C
970	YLL008W_aa_661-752	YLL008W_idr_9	9	C
971	YKR063C_aa_453-484	YKR063C_idr_2	9	C
972	YIR002C_aa_669-761	YIR002C_idr_4	9	C
973	YKL095W_aa_213-278	YKL095W_idr_6	9	C
974	YGL111W_aa_417-463	YGL111W_idr_3	9	C
975	YOR148C_aa_1-72	YOR148C_idr_1	9	C
976	YLL008W_aa_20-64	YLL008W_idr_3	9	C
977	YNL121C_aa_33-87	YNL121C_idr_4	9	C
978	YNL308C_aa_545-591	YNL308C_idr_4	9	C
979	YKR023W_aa_233-270	YKR023W_idr_6	9	C
980	YIL159W_aa_897-953	YIL159W_idr_2	9	C
981	YOR001W_aa_619-733	YOR001W_idr_5	9	C
982	YGL090W_aa_260-298	YGL090W_idr_2	9	C
983	YOR025W_aa_364-447	YOR025W_idr_2	9	C
984	YDL156W_aa_33-124	YDL156W_idr_2	9	C
985	YMR284W_aa_558-602	YMR284W_idr_3	9	C
986	YMR213W_aa_240-290	YMR213W_idr_7	9	C
987	YML021C_aa_1-80	YML021C_idr_1	9	C
988	YLR192C_aa_1-69	YLR192C_idr_1	9	C
989	YOR217W_aa_776-861	YOR217W_idr_9	9	C
990	YAL015C_aa_1-48	YAL015C_idr_1	9	C
991	YOR076C_aa_188-253	YOR076C_idr_5	9	C
992	YOR330C_aa_1043-1148	YOR330C_idr_11	9	C
993	YGR246C_aa_505-569	YGR246C_idr_6	9	C
994	YKR024C_aa_1-104	YKR024C_idr_1	9	C
995	YNL262W_aa_1181-1260	YNL262W_idr_6	9	C
996	YPL012W_aa_1138-1228	YPL012W_idr_2	9	C
997	YKR048C_aa_1-58	YKR048C_idr_1	9	C
998	YKL172W_aa_347-427	YKL172W_idr_4	9	C
999	YOR198C_aa_307-373	YOR198C_idr_6	9	C
1000	YAL019W_aa_109-277	YAL019W_idr_4	10	D
1001	YKL089W_aa_312-391	YKL089W_idr_5	10	D
1002	YKL124W_aa_441-579	YKL124W_idr_7	10	D
1003	YHR165C_aa_1-132	YHR165C_idr_1	10	D
1004	YDR334W_aa_67-264	YDR334W_idr_10	10	D
1005	YGR186W_aa_429-675	YGR186W_idr_9	10	D
1006	YKR062W_aa_38-117	YKR062W_idr_3	10	D
1007	YBR060C_aa_1-239	YBR060C_idr_1	10	D
1008	YHR118C_aa_102-271	YHR118C_idr_3	10	D
1009	YER041W_aa_548-759	YER041W_idr_7	10	D
1010	YDR464W_aa_1-648	YDR464W_idr_1	10	D
1011	YJL076W_aa_152-1189	YJL076W_idr_5	10	D
1012	YJL129C_aa_1010-1065	YJL129C_idr_3	10	D
1013	YKR050W_aa_699-733	YKR050W_idr_3	10	D
1014	YDR458C_aa_45-311	YDR458C_idr_3	10	D
1015	YML034W_aa_64-452	YML034W_idr_2	10	D
1016	YLR442C_aa_203-541	YLR442C_idr_3	10	D
1017	YML065W_aa_204-427	YML065W_idr_3	10	D
1018	YIL126W_aa_1037-1250	YIL126W_idr_7	10	D
1019	YFL013C_aa_471-597	YFL013C_idr_4	10	D
1020	YGL150C_aa_126-469	YGL150C_idr_17	10	D
1021	YNL136W_aa_140-425	YNL136W_idr_3	10	D
1022	YDR527W_aa_118-247	YDR527W_idr_4	10	D
1023	YFL023W_aa_295-643	YFL023W_idr_2	10	D
1024	YPL064C_aa_172-301	YPL064C_idr_2	10	D
1025	YMR039C_aa_114-292	YMR039C_idr_4	10	D
1026	YCL061C_aa_284-470	YCL061C_idr_10	10	D
1027	YKL108W_aa_99-429	YKL108W_idr_4	10	D
1028	YDR362C_aa_1-150	YDR362C_idr_1	10	D
1029	YDR097C_aa_1-272	YDR097C_idr_1	10	D
1030	YNL088W_aa_1172-1428	YNL088W_idr_16	10	D
1031	YOR217W_aa_1-119	YOR217W_idr_1	10	D
1032	YHR060W_aa_85-125	YHR060W_idr_2	10	D
1033	YBR114W_aa_1-149	YBR114W_idr_1	10	D
1034	YMR044W_aa_180-296	YMR044W_idr_4	10	D
1035	YOL006C_aa_1-137	YOL006C_idr_1	10	D
1036	YNL299W_aa_497-642	YNL299W_idr_3	10	D
1037	YOL115W_aa_506-584	YOL115W_idr_3	10	D
1038	YHR073W_aa_523-635	YHR073W_idr_7	10	D
1039	YMR137C_aa_1-148	YMR137C_idr_1	10	D
1040	YOR023C_aa_438-566	YOR023C_idr_2	10	D
1041	YAL011W_aa_496-535	YAL011W_idr_4	10	D
1042	YJL140W_aa_71-108	YJL140W_idr_2	10	D
1043	YOR144C_aa_277-321	YOR144C_idr_2	10	D
1044	YDR301W_aa_151-191	YDR301W_idr_1	10	D
1045	YGL209W_aa_319-362	YGL209W_idr_6	10	D
1046	YOR018W_aa_296-328	YOR018W_idr_3	10	D
1047	YBR223C_aa_1-75	YBR223C_idr_1	10	D
1048	YER162C_aa_16-107	YER162C_idr_3	10	D
1049	YGR140W_aa_635-716	YGR140W_idr_3	10	D
1050	YHR156C_aa_1-114	YHR156C_idr_1	10	D
1051	YNL299W_aa_1-158	YNL299W_idr_1	10	D
1052	YOL115W_aa_1-162	YOL115W_idr_1	10	D
1053	YJL092W_aa_672-717	YJL092W_idr_10	10	D
1054	YDL122W_aa_144-191	YDL122W_idr_6	10	D
1055	YHR065C_aa_1-78	YHR065C_idr_1	10	D
1056	YNL265C_aa_191-282	YNL265C_idr_2	10	D
1057	YKL082C_aa_190-260	YKL082C_idr_12	10	D
1058	YKR071C_aa_142-224	YKR071C_idr_2	10	D
1059	YCR092C_aa_1-125	YCR092C_idr_1	10	D
1060	YOL145C_aa_954-1077	YOL145C_idr_3	10	D
1061	YGR090W_aa_1-83	YGR090W_idr_1	10	D
1062	YDR496C_aa_1-116	YDR496C_idr_1	10	D
1063	YPR143W_aa_1-96	YPR143W_idr_1	10	D
1064	YMR014W_aa_229-513	YMR014W_idr_7	10	D
1065	YNL110C_aa_1-86	YNL110C_idr_1	10	D
1066	YPL195W_aa_634-932	YPL195W_idr_4	10	D
1067	YLR424W_aa_1-58	YLR424W_idr_1	10	D
1068	YOR368W_aa_342-393	YOR368W_idr_4	10	D
1069	YAL011W_aa_1-62	YAL011W_idr_1	10	D
1070	YLR320W_aa_116-524	YLR320W_idr_3	10	D
1071	YIL026C_aa_1-131	YIL026C_idr_1	10	D
1072	YLR399C_aa_426-524	YLR399C_idr_2	10	D
1073	YKL188C_aa_1-100	YKL188C_idr_1	10	D
1074	YFR013W_aa_732-787	YFR013W_idr_8	10	D
1075	YML098W_aa_105-167	YML098W_idr_2	10	D
1076	YLR005W_aa_1-67	YLR005W_idr_1	10	D
1077	YOR287C_aa_64-144	YOR287C_idr_3	10	D
1078	YMR076C_aa_1176-1277	YMR076C_idr_8	10	D
1079	YMR224C_aa_522-692	YMR224C_idr_5	10	D
1080	YNL273W_aa_935-1073	YNL273W_idr_3	10	D
1081	YKL168C_aa_266-403	YKL168C_idr_4	10	D
1082	YPL043W_aa_619-685	YPL043W_idr_8	10	D
1083	YGR081C_aa_121-161	YGR081C_idr_3	10	D
1084	YLL043W_aa_638-669	YLL043W_idr_6	10	D
1085	YML059C_aa_140-191	YML059C_idr_12	10	D
1086	YFL003C_aa_819-852	YFL003C_idr_4	10	D
1087	YLR221C_aa_1-47	YLR221C_idr_1	10	D
1088	YOR206W_aa_22-116	YOR206W_idr_3	10	D
1089	YBR225W_aa_506-552	YBR225W_idr_4	11	NA
1090	YLR265C_aa_280-342	YLR265C_idr_2	11	NA
1091	YGL251C_aa_1060-1187	YGL251C_idr_2	11	NA
1092	YDL105W_aa_155-213	YDL105W_idr_2	11	NA
1093	YLR090W_aa_399-459	YLR090W_idr_7	11	NA
1094	YDL171C_aa_1-40	YDL171C_idr_1	11	NA
1095	YER157W_aa_1-59	YER157W_idr_1	11	NA
1096	YLR105C_aa_152-203	YLR105C_idr_8	11	NA
1097	YLR310C_aa_935-985	YLR310C_idr_3	11	NA
1098	YIL107C_aa_1-149	YIL107C_idr_1	11	NA
1099	YDR438W_aa_77-107	YDR438W_idr_2	11	NA
1100	YGR004W_aa_404-462	YGR004W_idr_6	11	NA
1101	YPL082C_aa_86-125	YPL082C_idr_12	11	NA
1102	YKR093W_aa_1-64	YKR093W_idr_1	11	NA
1103	YLR386W_aa_328-378	YLR386W_idr_11	11	NA
1104	YHR036W_aa_167-268	YHR036W_idr_6	11	NA
1105	YMR140W_aa_1-86	YMR140W_idr_1	11	NA
1106	YPR141C_aa_1-89	YPR141C_idr_1	11	NA
1107	YDR249C_aa_1-48	YDR249C_idr_1	11	NA
1108	YPR031W_aa_36-106	YPR031W_idr_8	11	NA
1109	YDL022W_aa_1-32	YDL022W_idr_1	12	NA
1110	YDR166C_aa_29-96	YDR166C_idr_4	12	NA
1111	YDL240W_aa_510-660	YDL240W_idr_7	12	NA
1112	YER008C_aa_883-921	YER008C_idr_14	12	NA
1113	YGR009C_aa_512-591	YGR009C_idr_2	12	NA
1114	YPR049C_aa_662-706	YPR049C_idr_6	12	NA
1115	YCR081W_aa_419-465	YCR081W_idr_7	12	NA
1116	YDR349C_aa_470-506	YDR349C_idr_5	12	NA
1117	YJR030C_aa_684-725	YJR030C_idr_5	12	NA
1118	YLR452C_aa_371-416	YLR452C_idr_4	12	NA
1119	YDL101C_aa_1-30	YDL101C_idr_1	12	NA
1120	YMR266W_aa_1-42	YMR266W_idr_1	12	NA
1121	YHR090C_aa_164-214	YHR090C_idr_4	12	NA
1122	YAL026C_aa_1243-1355	YAL026C_idr_5	12	NA
1123	YKR031C_aa_1403-1526	YKR031C_idr_9	12	NA
1124	YGR186W_aa_294-335	YGR186W_idr_6	12	NA
1125	YHR075C_aa_1-69	YHR075C_idr_1	12	NA
1126	YHL023C_aa_858-889	YHL023C_idr_11	12	NA
1127	YCL061C_aa_797-836	YCL061C_idr_3	12	NA
1128	YDR167W_aa_1-61	YDR167W_idr_1	12	NA
1129	YER171W_aa_729-778	YER171W_idr_2	12	NA
1130	YLR223C_aa_782-813	YLR223C_idr_13	12	NA
1131	YPR022C_aa_993-1041	YPR022C_idr_11	12	NA
1132	YDR113C_aa_1-65	YDR113C_idr_1	12	NA
1133	YJL204C_aa_419-492	YJL204C_idr_6	12	NA
1134	YFR028C_aa_342-551	YFR028C_idr_2	12	NA
1135	YDR164C_aa_546-587	YDR164C_idr_5	12	NA
1136	YPR179C_aa_329-371	YPR179C_idr_6	12	NA
1137	YBR274W_aa_344-415	YBR274W_idr_4	12	NA
1138	YJL058C_aa_240-290	YJL058C_idr_6	12	NA
1139	YGL195W_aa_2601-2672	YGL195W_idr_41	12	NA
1140	YLR098C_aa_609-648	YLR098C_idr_3	12	NA
1141	YJR066W_aa_1767-1810	YJR066W_idr_13	12	NA
1142	YOR291W_aa_1093-1123	YOR291W_idr_5	12	NA
1143	YLR024C_aa_1261-1307	YLR024C_idr_19	12	NA
1144	YNL172W_aa_133-187	YNL172W_idr_12	12	NA
1145	YLR212C_aa_444-473	YLR212C_idr_2	12	NA
1146	YOR348C_aa_1-102	YOR348C_idr_1	12	NA
1147	YER176W_aa_996-1028	YER176W_idr_8	12	NA
1148	YFL002C_aa_502-606	YFL002C_idr_4	12	NA
1149	YDR055W_aa_1-31	YDR055W_idr_1	12	NA
1150	YIL123W_aa_1-34	YIL123W_idr_1	12	NA
1151	YBR245C_aa_656-740	YBR245C_idr_13	12	NA
1152	YNR054C_aa_287-316	YNR054C_idr_5	12	NA
1153	YAL054C_aa_1-47	YAL054C_idr_1	12	NA
1154	YDL226C_aa_133-241	YDL226C_idr_5	12	NA
1155	YDL010W_aa_39-109	YDL010W_idr_3	12	NA
1156	YDL065C_aa_81-136	YDL065C_idr_2	12	NA
1157	YKL002W_aa_188-217	YKL002W_idr_3	12	NA
1158	YDL126C_aa_791-835	YDL126C_idr_7	12	NA
1159	YGR005C_aa_1-54	YGR005C_idr_1	12	NA
1160	YDR260C_aa_42-76	YDR260C_idr_3	12	NA
1161	YNL161W_aa_505-558	YNL161W_idr_5	12	NA
1162	YGL153W_aa_240-341	YGL153W_idr_3	12	NA
1163	YGR013W_aa_54-95	YGR013W_idr_15	12	NA
1164	YMR070W_aa_420-490	YMR070W_idr_9	12	NA
1165	YFR019W_aa_1877-1994	YFR019W_idr_4	12	NA
1166	YIR023W_aa_497-541	YIR023W_idr_5	12	NA
1167	YML130C_aa_1-35	YML130C_idr_1	12	NA
1168	YDL160C_aa_1-41	YDL160C_idr_1	12	NA
1169	YMR199W_aa_459-505	YMR199W_idr_6	12	NA
1170	YKL109W_aa_378-420	YKL109W_idr_10	12	NA
1171	YHR149C_aa_643-693	YHR149C_idr_8	12	NA
1172	YMR015C_aa_1-50	YMR015C_idr_1	12	NA
1173	YDR489W_aa_1-51	YDR489W_idr_1	12	NA
1174	YIL110W_aa_11-49	YIL110W_idr_1	12	NA
1175	YIL038C_aa_788-822	YIL038C_idr_2	12	NA
1176	YNL093W_aa_185-218	YNL093W_idr_2	12	NA
1177	YDR176W_aa_415-497	YDR176W_idr_4	12	NA
1178	YNL041C_aa_5-83	YNL041C_idr_5	12	NA
1179	YPL122C_aa_289-332	YPL122C_idr_2	12	NA
1180	YPR041W_aa_148-225	YPR041W_idr_2	12	NA
1181	YJL051W_aa_315-351	YJL051W_idr_23	12	NA
1182	YER155C_aa_1003-1076	YER155C_idr_9	12	NA
1183	YNL041C_aa_86-143	YNL041C_idr_6	12	NA
1184	YLR319C_aa_456-502	YLR319C_idr_15	12	NA
1185	YML010W_aa_759-795	YML010W_idr_9	12	NA
1186	YOL032W_aa_153-186	YOL032W_idr_2	12	NA
1187	YPL150W_aa_1-33	YPL150W_idr_1	12	NA
1188	YGR081C_aa_1-37	YGR081C_idr_1	12	NA
1189	YNL177C_aa_1-86	YNL177C_idr_1	12	NA
1190	YPR049C_aa_921-952	YPR049C_idr_15	12	NA
1191	YOL100W_aa_729-775	YOL100W_idr_4	12	NA
1192	YPL026C_aa_48-94	YPL026C_idr_2	12	NA
1193	YHR089C_aa_128-205	YHR089C_idr_2	12	NA
1194	YKL045W_aa_1-47	YKL045W_idr_1	12	NA
1195	YBL093C_aa_180-220	YBL093C_idr_2	12	NA
1196	YDR324C_aa_665-727	YDR324C_idr_2	12	NA
1197	YLR401C_aa_45-89	YLR401C_idr_2	12	NA
1198	YLR015W_aa_268-298	YLR015W_idr_3	12	NA
1199	YNL183C_aa_756-790	YNL183C_idr_4	12	NA
1200	YNL091W_aa_1-55	YNL091W_idr_1	12	NA
1201	YPL094C_aa_244-274	YPL094C_idr_2	12	NA
1202	YDL060W_aa_1-66	YDL060W_idr_1	12	NA
1203	YDR265W_aa_234-280	YDR265W_idr_2	12	NA
1204	YLR247C_aa_1185-1237	YLR247C_idr_19	12	NA
1205	YDR159W_aa_1084-1129	YDR159W_idr_12	12	NA
1206	YER104W_aa_79-116	YER104W_idr_3	12	NA
1207	YMR001C_aa_398-505	YMR001C_idr_2	12	NA
1208	YDR285W_aa_129-174	YDR285W_idr_13	12	NA
1209	YDL113C_aa_497-538	YDL113C_idr_6	12	NA
1210	YGR267C_aa_1-30	YGR267C_idr_1	12	NA
1211	YJL005W_aa_1927-1960	YJL005W_idr_28	12	NA
1212	YMR295C_aa_1-40	YMR295C_idr_1	12	NA
1213	YGR237C_aa_180-237	YGR237C_idr_11	12	NA
1214	YOR005C_aa_646-682	YOR005C_idr_4	12	NA
1215	YPR055W_aa_1-31	YPR055W_idr_1	12	NA
1216	YDR369C_aa_601-665	YDR369C_idr_5	12	NA
1217	YNL189W_aa_1-32	YNL189W_idr_1	12	NA
1218	YJL207C_aa_788-818	YJL207C_idr_7	12	NA
1219	YER024W_aa_448-484	YER024W_idr_8	12	NA
1220	YLR430W_aa_892-1108	YLR430W_idr_22	12	NA
1221	YDR416W_aa_820-859	YDR416W_idr_2	12	NA
1222	YNL273W_aa_305-342	YNL273W_idr_7	12	NA
1223	YMR268C_aa_393-429	YMR268C_idr_4	12	NA
1224	YNR017W_aa_1-41	YNR017W_idr_1	12	NA
1225	YER164W_aa_1266-1374	YER164W_idr_9	12	NA
1226	YGR270W_aa_346-408	YGR270W_idr_18	12	NA
1227	YJR138W_aa_1277-1343	YJR138W_idr_7	12	NA
1228	YLR417W_aa_149-178	YLR417W_idr_6	12	NA
1229	YNL311C_aa_1-50	YNL311C_idr_1	12	NA
1230	YNL298W_aa_1-60	YNL298W_idr_1	12	NA
1231	YOR304W_aa_128-159	YOR304W_idr_3	12	NA
1232	YAL010C_aa_321-401	YAL010C_idr_2	13	E
1233	YJL197W_aa_291-356	YJL197W_idr_3	13	E
1234	YBL088C_aa_1446-1478	YBL088C_idr_22	13	E
1235	YBL014C_aa_557-610	YBL014C_idr_2	13	E
1236	YLR247C_aa_231-286	YLR247C_idr_27	13	E
1237	YHR155W_aa_269-306	YHR155W_idr_7	13	E
1238	YJL092W_aa_757-825	YJL092W_idr_11	13	E
1239	YHR155W_aa_424-489	YHR155W_idr_8	13	E
1240	YNL257C_aa_428-491	YNL257C_idr_23	13	E
1241	YBL088C_aa_1506-1544	YBL088C_idr_25	13	E
1242	YBL088C_aa_1224-1270	YBL088C_idr_14	13	E
1243	YDR293C_aa_1158-1207	YDR293C_idr_3	13	E
1244	YER132C_aa_1184-1222	YER132C_idr_3	13	E
1245	YPL216W_aa_813-870	YPL216W_idr_4	13	E
1246	YJR138W_aa_1127-1181	YJR138W_idr_6	13	E
1247	YMR100W_aa_332-375	YMR100W_idr_10	13	E
1248	YHR155W_aa_716-763	YHR155W_idr_11	13	E
1249	YDR283C_aa_151-227	YDR283C_idr_16	13	E
1250	YFR019W_aa_1062-1175	YFR019W_idr_14	13	E
1251	YGR217W_aa_997-1142	YGR217W_idr_4	13	E
1252	YKR031C_aa_1336-1400	YKR031C_idr_8	13	E
1253	YBR021W_aa_597-633	YBR021W_idr_3	13	E
1254	YDR457W_aa_1211-1286	YDR457W_idr_7	13	E
1255	YBL088C_aa_1415-1444	YBL088C_idr_21	13	E
1256	YGR184C_aa_1525-1561	YGR184C_idr_16	13	E
1257	YHR099W_aa_490-569	YHR099W_idr_63	13	E
1258	YLR056W_aa_334-365	YLR056W_idr_3	13	E
1259	YGL173C_aa_364-502	YGL173C_idr_13	13	E
1260	YBR140C_aa_1935-2047	YBR140C_idr_25	13	E
1261	YLR424W_aa_584-625	YLR424W_idr_3	13	E
1262	YLR454W_aa_224-260	YLR454W_idr_23	13	E
1263	YKL050C_aa_566-598	YKL050C_idr_21	13	E
1264	YML072C_aa_937-1004	YML072C_idr_13	13	E
1265	YOL089C_aa_561-591	YOL089C_idr_7	13	E
1266	YOR191W_aa_1400-1434	YOR191W_idr_22	13	E
1267	YBR168W_aa_250-302	YBR168W_idr_4	13	E
1268	YNL227C_aa_142-174	YNL227C_idr_7	13	E
1269	YGR266W_aa_610-648	YGR266W_idr_6	13	E
1270	YGR184C_aa_1247-1287	YGR184C_idr_11	13	E
1271	YML104C_aa_391-420	YML104C_idr_3	13	E
1272	YAL029C_aa_928-1112	YAL029C_idr_9	13	E
1273	YOR326W_aa_983-1170	YOR326W_idr_16	13	E
1274	YCR054C_aa_404-438	YCR054C_idr_2	13	E
1275	YBL063W_aa_543-587	YBL063W_idr_4	13	E
1276	YKR095W_aa_434-463	YKR095W_idr_13	13	E
1277	YIL150C_aa_439-478	YIL150C_idr_6	13	E
1278	YKR095W_aa_227-264	YKR095W_idr_67	13	E
1279	YJR035W_aa_830-892	YJR035W_idr_8	13	E
1280	YKR095W_aa_548-586	YKR095W_idr_18	13	E
1281	YER111C_aa_906-953	YER111C_idr_9	13	E
1282	YIL149C_aa_950-1003	YIL149C_idr_41	13	E
1283	YKR095W_aa_985-1022	YKR095W_idr_39	13	E
1284	YHR023W_aa_1241-1317	YHR023W_idr_15	13	E
1285	YIL149C_aa_1120-1159	YIL149C_idr_47	13	E
1286	YIL149C_aa_725-784	YIL149C_idr_35	13	E
1287	YKR095W_aa_782-852	YKR095W_idr_30	13	E
1288	YNL250W_aa_439-523	YNL250W_idr_8	13	E
1289	YIL149C_aa_679-723	YIL149C_idr_33	13	E
1290	YIL149C_aa_821-852	YIL149C_idr_38	13	E
1291	YBR055C_aa_165-198	YBR055C_idr_3	13	E
1292	YER100W_aa_168-238	YER100W_idr_2	13	E
1293	YKL033W_aa_440-476	YKL033W_idr_13	13	E
1294	YGR170W_aa_1089-1133	YGR170W_idr_8	13	E
1295	YMR176W_aa_1154-1234	YMR176W_idr_10	13	E
1296	YHR124W_aa_203-242	YHR124W_idr_5	13	E
1297	YMR176W_aa_858-889	YMR176W_idr_5	13	E
1298	YBL063W_aa_940-992	YBL063W_idr_36	13	E
1299	YKL126W_aa_263-337	YKL126W_idr_4	13	E
1300	YNR031C_aa_1182-1259	YNR031C_idr_10	13	E
1301	YGR098C_aa_1117-1152	YGR098C_idr_8	13	E
1302	YBR140C_aa_3043-3092	YBR140C_idr_38	13	E
1303	YOL081W_aa_3030-3079	YOL081W_idr_57	13	E
1304	YBL088C_aa_760-804	YBL088C_idr_7	13	E
1305	YLR106C_aa_2372-2453	YLR106C_idr_44	13	E
1306	YEL061C_aa_848-882	YEL061C_idr_9	13	E
1307	YNL172W_aa_1649-1731	YNL172W_idr_13	13	E
1308	YBR237W_aa_653-750	YBR237W_idr_6	13	E
1309	YKL033W_aa_261-298	YKL033W_idr_12	13	E
1310	YLR247C_aa_1290-1349	YLR247C_idr_20	13	E
1311	YGL133W_aa_936-998	YGL133W_idr_2	13	E
1312	YBL063W_aa_605-635	YBL063W_idr_7	13	E
1313	YDR443C_aa_872-908	YDR443C_idr_12	13	E
1314	YLL005C_aa_828-868	YLL005C_idr_8	13	E
1315	YPR117W_aa_658-691	YPR117W_idr_8	13	E
1316	YLR106C_aa_3889-3919	YLR106C_idr_94	13	E
1317	YHL030W_aa_1834-1868	YHL030W_idr_22	13	E
1318	YLR106C_aa_2155-2187	YLR106C_idr_40	13	E
1319	YPR055W_aa_772-814	YPR055W_idr_3	13	E
1320	YML104C_aa_285-319	YML104C_idr_18	13	E
1321	YKL073W_aa_678-740	YKL073W_idr_6	13	E
1322	YLR106C_aa_1416-1463	YLR106C_idr_32	13	E
1323	YKR093W_aa_563-601	YKR093W_idr_2	13	E
1324	YLR087C_aa_782-833	YLR087C_idr_2	13	E
1325	YIL149C_aa_595-631	YIL149C_idr_25	13	E
1326	YKR095W_aa_602-654	YKR095W_idr_22	13	E
1327	YKR054C_aa_1-49	YKR054C_idr_1	13	E
1328	YBL004W_aa_1823-1862	YBL004W_idr_27	13	E
1329	YER164W_aa_893-1011	YER164W_idr_5	13	E
1330	YJR035W_aa_387-430	YJR035W_idr_4	13	E
1331	YLR419W_aa_532-591	YLR419W_idr_14	13	E
1332	YPL109C_aa_428-458	YPL109C_idr_6	13	E
1333	YCR032W_aa_1193-1231	YCR032W_idr_21	13	E
1334	YNL082W_aa_589-649	YNL082W_idr_5	13	E
1335	YGR271W_aa_26-85	YGR271W_idr_17	13	E
1336	YPL020C_aa_312-367	YPL020C_idr_12	13	E
1337	YHR023W_aa_1190-1227	YHR023W_idr_14	13	E
1338	YGR099W_aa_557-608	YGR099W_idr_3	13	E
1339	YPR018W_aa_278-335	YPR018W_idr_3	13	E
1340	YLR087C_aa_1884-1918	YLR087C_idr_42	13	E
1341	YLR106C_aa_3546-3661	YLR106C_idr_80	13	E
1342	YPR117W_aa_1618-1665	YPR117W_idr_27	13	E
1343	YDL225W_aa_57-90	YDL225W_idr_2	13	E
1344	YLR106C_aa_2285-2336	YLR106C_idr_43	13	E
1345	YNL137C_aa_312-347	YNL137C_idr_5	13	E
1346	YGL133W_aa_1231-1264	YGL133W_idr_5	13	E
1347	YOR304W_aa_1062-1120	YOR304W_idr_9	13	E
1348	YDR485C_aa_621-652	YDR485C_idr_2	13	E
1349	YJR089W_aa_797-840	YJR089W_idr_9	13	E
1350	YLR106C_aa_3225-3256	YLR106C_idr_76	13	E
1351	YLR417W_aa_288-320	YLR417W_idr_8	13	E
1352	YNL221C_aa_671-755	YNL221C_idr_2	13	E
1353	YMR053C_aa_590-619	YMR053C_idr_6	13	E
1354	YOL081W_aa_1993-2041	YOL081W_idr_31	13	E
1355	YMR266W_aa_704-802	YMR266W_idr_2	13	E
1356	YPL260W_aa_239-274	YPL260W_idr_4	13	E
1357	YDL174C_aa_59-97	YDL174C_idr_2	14	F
1358	YDL063C_aa_305-338	YDL063C_idr_4	14	F
1359	YER172C_aa_365-450	YER172C_idr_2	14	F
1360	YKL155C_aa_573-628	YKL155C_idr_5	14	F
1361	YOR141C_aa_649-699	YOR141C_idr_10	14	F
1362	YFL036W_aa_348-404	YFL036W_idr_10	14	F
1363	YHL030W_aa_1683-1725	YHL030W_idr_21	14	F
1364	YGR270W_aa_702-750	YGR270W_idr_10	14	F
1365	YNL323W_aa_8-52	YNL323W_idr_2	14	F
1366	YGR199W_aa_1-57	YGR199W_idr_1	14	F
1367	YOR326W_aa_1498-1535	YOR326W_idr_21	14	F
1368	YBL091C_aa_1-54	YBL091C_idr_1	14	F
1369	YLL048C_aa_928-1005	YLL048C_idr_4	14	F
1370	YAL023C_aa_1-58	YAL023C_idr_1	14	F
1371	YIL115C_aa_1405-1438	YIL115C_idr_5	14	F
1372	YNL308C_aa_1-71	YNL308C_idr_1	14	F
1373	YIL104C_aa_128-163	YIL104C_idr_4	14	F
1374	YMR028W_aa_237-267	YMR028W_idr_7	14	F
1375	YGL064C_aa_441-479	YGL064C_idr_2	14	F
1376	YHR027C_aa_1-43	YHR027C_idr_1	14	F
1377	YOR261C_aa_301-338	YOR261C_idr_3	14	F
1378	YOL022C_aa_195-229	YOL022C_idr_3	14	F
1379	YBL011W_aa_607-668	YBL011W_idr_2	14	F
1380	YGL050W_aa_237-273	YGL050W_idr_5	14	F
1381	YLR409C_aa_765-809	YLR409C_idr_4	14	F
1382	YNL287W_aa_598-671	YNL287W_idr_3	14	F
1383	YOR153W_aa_816-861	YOR153W_idr_8	14	F
1384	YGR103W_aa_471-555	YGR103W_idr_6	14	F
1385	YKR081C_aa_295-344	YKR081C_idr_2	14	F
1386	YDR334W_aa_1401-1500	YDR334W_idr_9	14	F
1387	YDR363W_aa_316-379	YDR363W_idr_7	14	F
1388	YBR073W_aa_848-909	YBR073W_idr_2	14	F
1389	YKL143W_aa_189-265	YKL143W_idr_4	14	F
1390	YJR072C_aa_273-350	YJR072C_idr_2	14	F
1391	YNL139C_aa_358-396	YNL139C_idr_13	14	F
1392	YNL308C_aa_375-451	YNL308C_idr_10	14	F
1393	YPL240C_aa_215-258	YPL240C_idr_2	14	F
1394	YDR484W_aa_8-38	YDR484W_idr_6	14	F
1395	YFL036W_aa_274-334	YFL036W_idr_8	14	F
1396	YML013W_aa_478-519	YML013W_idr_8	14	F
1397	YMR012W_aa_630-697	YMR012W_idr_5	14	F
1398	YGL233W_aa_1-57	YGL233W_idr_1	14	F
1399	YEL022W_aa_876-906	YEL022W_idr_2	14	F
1400	YLR106C_aa_3152-3206	YLR106C_idr_74	14	F
1401	YGL110C_aa_433-480	YGL110C_idr_5	14	F
1402	YGR103W_aa_260-352	YGR103W_idr_5	14	F
1403	YPR112C_aa_605-658	YPR112C_idr_5	14	F
1404	YLR427W_aa_375-407	YLR427W_idr_4	14	F
1405	YPL058C_aa_1-86	YPL058C_idr_1	14	F
1406	YGR281W_aa_810-873	YGR281W_idr_16	14	F
1407	YOR290C_aa_685-752	YOR290C_idr_4	14	F
1408	YDL084W_aa_1-57	YDL084W_idr_1	14	F
1409	YGR214W_aa_209-252	YGR214W_idr_2	14	F
1410	YLR048W_aa_209-252	YLR048W_idr_2	14	F
1411	YFR037C_aa_504-547	YFR037C_idr_7	14	F
1412	YLR009W_aa_146-186	YLR009W_idr_2	14	F
1413	YLR340W_aa_278-312	YLR340W_idr_2	14	F
1414	YOR361C_aa_25-63	YOR361C_idr_2	14	F
1415	YPL082C_aa_1789-1861	YPL082C_idr_17	14	F
1416	YJL010C_aa_1-48	YJL010C_idr_1	14	F
1417	YPL237W_aa_1-123	YPL237W_idr_1	14	F
1418	YLR003C_aa_13-96	YLR003C_idr_2	14	F
1419	YMR240C_aa_78-126	YMR240C_idr_2	14	F
1420	YMR128W_aa_1-107	YMR128W_idr_1	14	F
1421	YOR243C_aa_1-35	YOR243C_idr_1	14	F
1422	YDR088C_aa_199-240	YDR088C_idr_6	14	F
1423	YJL033W_aa_491-603	YJL033W_idr_2	14	F
1424	YDR141C_aa_228-267	YDR141C_idr_23	14	F
1425	YPL231W_aa_586-630	YPL231W_idr_5	14	F
1426	YLR336C_aa_596-629	YLR336C_idr_9	14	F
1427	YGR116W_aa_62-110	YGR116W_idr_7	14	F
1428	YPR018W_aa_387-443	YPR018W_idr_4	14	F
1429	YMR229C_aa_54-104	YMR229C_idr_15	14	F
1430	YNL175C_aa_80-121	YNL175C_idr_2	14	F
1431	YPR173C_aa_70-108	YPR173C_idr_2	14	F
1432	YPL012W_aa_1023-1136	YPL012W_idr_10	14	F
1433	YDR243C_aa_1-108	YDR243C_idr_1	15	NA
1434	YDL040C_aa_626-675	YDL040C_idr_3	15	NA
1435	YDR014W_aa_122-155	YDR014W_idr_2	15	NA
1436	YML049C_aa_1256-1296	YML049C_idr_5	15	NA
1437	YOR308C_aa_197-367	YOR308C_idr_11	15	NA
1438	YIL150C_aa_489-541	YIL150C_idr_8	15	NA
1439	YPL217C_aa_1123-1183	YPL217C_idr_4	15	NA
1440	YOR017W_aa_734-770	YOR017W_idr_10	15	NA
1441	YNL325C_aa_695-767	YNL325C_idr_4	15	NA
1442	YBR227C_aa_301-331	YBR227C_idr_3	15	NA
1443	YHL020C_aa_369-404	YHL020C_idr_8	15	NA
1444	YLR032W_aa_942-975	YLR032W_idr_3	15	NA
1445	YGL171W_aa_1-78	YGL171W_idr_1	15	NA
1446	YGL140C_aa_1179-1219	YGL140C_idr_9	15	NA
1447	YJL054W_aa_154-195	YJL054W_idr_2	15	NA
1448	YGL171W_aa_511-564	YGL171W_idr_4	15	NA
1449	YDR365C_aa_439-507	YDR365C_idr_12	15	NA
1450	YDR365C_aa_202-243	YDR365C_idr_6	15	NA
1451	YPL263C_aa_1-47	YPL263C_idr_1	15	NA
1452	YGR145W_aa_509-642	YGR145W_idr_5	15	NA
1453	YNR011C_aa_109-206	YNR011C_idr_8	15	NA
1454	YGR147C_aa_153-184	YGR147C_idr_3	15	NA
1455	YNL119W_aa_392-433	YNL119W_idr_3	15	NA
1456	YKR095W_aa_1073-1109	YKR095W_idr_47	15	NA
1457	YOR205C_aa_52-82	YOR205C_idr_2	15	NA
1458	YLR454W_aa_1873-1956	YLR454W_idr_30	15	NA
1459	YNR019W_aa_355-393	YNR019W_idr_5	15	NA
1460	YCR016W_aa_18-112	YCR016W_idr_2	15	NA
1461	YKR024C_aa_589-632	YKR024C_idr_6	15	NA
1462	YHR111W_aa_1-36	YHR111W_idr_1	15	NA
1463	YLR433C_aa_514-553	YLR433C_idr_9	15	NA
1464	YML057W_aa_562-604	YML057W_idr_6	15	NA
1465	YNL286W_aa_1-38	YNL286W_idr_1	15	NA
1466	YDR478W_aa_123-166	YDR478W_idr_3	15	NA
1467	YER154W_aa_334-402	YER154W_idr_4	15	NA
1468	YNL271C_aa_863-953	YNL271C_idr_16	15	NA
1469	YPL107W_aa_142-205	YPL107W_idr_2	15	NA
1470	YOR217W_aa_239-292	YOR217W_idr_6	15	NA
1471	YPR125W_aa_395-454	YPR125W_idr_2	15	NA
1472	YHR052W_aa_300-376	YHR052W_idr_3	15	NA
1473	YOR086C_aa_797-851	YOR086C_idr_5	15	NA
1474	YOR198C_aa_430-470	YOR198C_idr_8	15	NA
1475	YGR053C_aa_151-188	YGR053C_idr_2	16	NA
1476	YFR023W_aa_1-36	YFR023W_idr_1	16	NA
1477	YIL013C_aa_668-744	YIL013C_idr_6	16	NA
1478	YER075C_aa_887-928	YER075C_idr_11	16	NA
1479	YMR176W_aa_338-392	YMR176W_idr_16	16	NA
1480	YAL026C_aa_1-173	YAL026C_idr_1	16	NA
1481	YGR217W_aa_1957-2039	YGR217W_idr_9	16	NA
1482	YPL196W_aa_1-60	YPL196W_idr_1	16	NA
1483	YIL149C_aa_1621-1679	YIL149C_idr_76	16	NA
1484	YDR420W_aa_1522-1562	YDR420W_idr_18	16	NA
1485	YLR425W_aa_1123-1171	YLR425W_idr_10	16	NA
1486	YKL178C_aa_309-359	YKL178C_idr_2	16	NA
1487	YLR141W_aa_310-348	YLR141W_idr_5	16	NA
1488	YLR087C_aa_1114-1207	YLR087C_idr_5	16	NA
1489	YOL075C_aa_647-676	YOL075C_idr_7	16	NA
1490	YBL063W_aa_1004-1111	YBL063W_idr_38	16	NA
1491	YKL101W_aa_379-416	YKL101W_idr_3	16	NA
1492	YDR180W_aa_27-178	YDR180W_idr_12	16	NA
1493	YIL072W_aa_518-605	YIL072W_idr_8	16	NA
1494	YHR062C_aa_255-293	YHR062C_idr_3	16	NA
1495	YOR144C_aa_1-234	YOR144C_idr_1	16	NA
1496	YPL167C_aa_356-518	YPL167C_idr_20	16	NA
1497	YBR235W_aa_860-1047	YBR235W_idr_5	16	NA
1498	YLR454W_aa_1096-1173	YLR454W_idr_18	16	NA
1499	YER028C_aa_325-374	YER028C_idr_10	16	NA
1500	YLL043W_aa_553-616	YLL043W_idr_4	16	NA
1501	YMR162C_aa_1518-1656	YMR162C_idr_11	16	NA
1502	YNL102W_aa_74-347	YNL102W_idr_5	16	NA
1503	YOR281C_aa_235-286	YOR281C_idr_7	16	NA
1504	YBL052C_aa_29-111	YBL052C_idr_4	16	NA
1505	YLR131C_aa_690-770	YLR131C_idr_8	16	NA
1506	YGR059W_aa_25-91	YGR059W_idr_3	16	NA
1507	YPR117W_aa_931-967	YPR117W_idr_11	16	NA
1508	YBL101C_aa_404-440	YBL101C_idr_9	16	NA
1509	YNL172W_aa_821-897	YNL172W_idr_2	16	NA
1510	YPR030W_aa_432-469	YPR030W_idr_14	16	NA
1511	YDL209C_aa_233-271	YDL209C_idr_2	17	NA
1512	YBL097W_aa_416-457	YBL097W_idr_10	17	NA
1513	YGR083C_aa_563-598	YGR083C_idr_3	17	NA
1514	YDR326C_aa_1015-1057	YDR326C_idr_6	17	NA
1515	YML130C_aa_427-490	YML130C_idr_3	17	NA
1516	YDR170C_aa_1704-1818	YDR170C_idr_9	17	NA
1517	YDR150W_aa_1-91	YDR150W_idr_1	17	NA
1518	YPL177C_aa_227-306	YPL177C_idr_5	17	NA
1519	YBR179C_aa_1-31	YBR179C_idr_1	17	NA
1520	YCR065W_aa_533-564	YCR065W_idr_4	17	NA
1521	YFR023W_aa_38-86	YFR023W_idr_3	17	NA
1522	YOL078W_aa_82-181	YOL078W_idr_7	17	NA
1523	YKR031C_aa_1227-1285	YKR031C_idr_6	17	NA
1524	YLR015W_aa_390-419	YLR015W_idr_4	17	NA
1525	YDR159W_aa_551-725	YDR159W_idr_8	17	NA
1526	YIL149C_aa_1474-1609	YIL149C_idr_75	17	NA
1527	YDR137W_aa_64-125	YDR137W_idr_5	17	NA
1528	YDR457W_aa_1577-1609	YDR457W_idr_17	17	NA
1529	YDR137W_aa_343-480	YDR137W_idr_9	17	NA
1530	YLR002C_aa_1-68	YLR002C_idr_1	17	NA
1531	YGR271W_aa_165-233	YGR271W_idr_21	17	NA
1532	YPL194W_aa_552-612	YPL194W_idr_8	17	NA
1533	YOR249C_aa_190-243	YOR249C_idr_6	17	NA
1534	YBR130C_aa_369-425	YBR130C_idr_6	17	NA
1535	YOR043W_aa_124-155	YOR043W_idr_2	17	NA
1536	YGR238C_aa_1-56	YGR238C_idr_1	17	NA
1537	YGL084C_aa_1-34	YGL084C_idr_1	17	NA
1538	YGR273C_aa_136-174	YGR273C_idr_3	17	NA
1539	YPR002W_aa_1-32	YPR002W_idr_1	17	NA
1540	YLR054C_aa_380-433	YLR054C_idr_8	17	NA
1541	YMR078C_aa_629-713	YMR078C_idr_7	17	NA
1542	YER111C_aa_694-762	YER111C_idr_18	17	NA
1543	YOL045W_aa_103-211	YOL045W_idr_4	17	NA
1544	YOR178C_aa_435-485	YOR178C_idr_9	17	NA
1545	YML006C_aa_141-192	YML006C_idr_6	17	NA
1546	YLR273C_aa_70-151	YLR273C_idr_10	17	NA
1547	YOR178C_aa_86-204	YOR178C_idr_5	17	NA
1548	YOR191W_aa_199-288	YOR191W_idr_27	17	NA
1549	YBR023C_aa_496-624	YBR023C_idr_2	18	NA
1550	YDR081C_aa_859-925	YDR081C_idr_7	18	NA
1551	YLR310C_aa_720-806	YLR310C_idr_21	18	NA
1552	YML031W_aa_453-484	YML031W_idr_5	18	NA
1553	YAL051W_aa_1-61	YAL051W_idr_1	18	NA
1554	YNL194C_aa_217-259	YNL194C_idr_2	18	NA
1555	YBR207W_aa_421-465	YBR207W_idr_4	18	NA
1556	YDR451C_aa_1-32	YDR451C_idr_1	18	NA
1557	YDR351W_aa_434-496	YDR351W_idr_2	18	NA
1558	YMR100W_aa_165-211	YMR100W_idr_5	18	NA
1559	YJL099W_aa_1-32	YJL099W_idr_1	18	NA
1560	YKR027W_aa_1-36	YKR027W_idr_1	18	NA
1561	YJR137C_aa_1-37	YJR137C_idr_1	18	NA
1562	YOR227W_aa_999-1100	YOR227W_idr_3	18	NA
1563	YPL137C_aa_1009-1105	YPL137C_idr_4	18	NA
1564	YGR184C_aa_1337-1403	YGR184C_idr_13	18	NA
1565	YGR211W_aa_1-45	YGR211W_idr_1	18	NA
1566	YHL027W_aa_583-620	YHL027W_idr_4	18	NA
1567	YPR117W_aa_1782-1832	YPR117W_idr_32	18	NA
1568	YNL163C_aa_808-842	YNL163C_idr_5	18	NA
1569	YBR097W_aa_919-1033	YBR097W_idr_2	19	NA
1570	YDR227W_aa_1202-1233	YDR227W_idr_16	19	NA
1571	YPL070W_aa_417-479	YPL070W_idr_7	19	NA
1572	YCR032W_aa_1502-1551	YCR032W_idr_31	19	NA
1573	YML104C_aa_910-972	YML104C_idr_9	19	NA
1574	YDR421W_aa_66-222	YDR421W_idr_8	19	NA
1575	YDR422C_aa_565-650	YDR422C_idr_8	19	NA
1576	YER024W_aa_804-845	YER024W_idr_2	19	NA
1577	YMR190C_aa_1193-1266	YMR190C_idr_5	19	NA
1578	YKR029C_aa_515-738	YKR029C_idr_8	19	NA
1579	YDL133W_aa_91-125	YDL133W_idr_2	19	NA
1580	YGL045W_aa_396-429	YGL045W_idr_5	19	NA
1581	YGL131C_aa_974-1033	YGL131C_idr_5	19	NA
1582	YOR079C_aa_125-155	YOR079C_idr_2	19	NA
1583	YLR310C_aa_1248-1292	YLR310C_idr_13	19	NA
1584	YMR291W_aa_397-448	YMR291W_idr_4	19	NA
1585	YBR276C_aa_539-575	YBR276C_idr_4	19	NA
1586	YJR110W_aa_647-683	YJR110W_idr_7	19	NA
1587	YLR422W_aa_410-445	YLR422W_idr_4	19	NA
1588	YLR183C_aa_1-43	YLR183C_idr_1	19	NA
1589	YLR452C_aa_548-649	YLR452C_idr_6	19	NA
1590	YAL048C_aa_616-662	YAL048C_idr_4	19	NA
1591	YGL151W_aa_244-283	YGL151W_idr_8	19	NA
1592	YJL130C_aa_1832-1904	YJL130C_idr_4	19	NA
1593	YMR212C_aa_209-242	YMR212C_idr_2	19	NA
1594	YDR034C_aa_195-336	YDR034C_idr_3	19	NA
1595	YMR280C_aa_293-367	YMR280C_idr_26	19	NA
1596	YHR015W_aa_483-582	YHR015W_idr_8	19	NA
1597	YJR138W_aa_518-865	YJR138W_idr_2	19	NA
1598	YGR225W_aa_149-207	YGR225W_idr_2	19	NA
1599	YNL127W_aa_476-542	YNL127W_idr_14	19	NA
1600	YFR006W_aa_1-62	YFR006W_idr_1	20	NA
1601	YBR024W_aa_1-82	YBR024W_idr_1	20	NA
1602	YBR037C_aa_1-76	YBR037C_idr_1	20	NA
1603	YBR041W_aa_1-39	YBR041W_idr_1	20	NA
1604	YJL206C_aa_1-42	YJL206C_idr_1	20	NA
1605	YGR098C_aa_994-1045	YGR098C_idr_4	20	NA
1606	YER069W_aa_1-65	YER069W_idr_1	20	NA
1607	YIL014W_aa_1-39	YIL014W_idr_1	20	NA
1608	YJL139C_aa_1-42	YJL139C_idr_1	20	NA
1609	YJR051W_aa_1-30	YJR051W_idr_1	20	NA
1610	YDL178W_aa_1-51	YDL178W_idr_1	20	NA
1611	YOR330C_aa_1-39	YOR330C_idr_1	20	NA
1612	YDR411C_aa_291-341	YDR411C_idr_4	20	NA
1613	YDR001C_aa_1-31	YDR001C_idr_1	20	NA
1614	YMR268C_aa_1-36	YMR268C_idr_1	20	NA
1615	YLR266C_aa_69-127	YLR266C_idr_4	20	NA
1616	YBL042C_aa_1-65	YBL042C_idr_1	20	NA
1617	YLL035W_aa_1-67	YLL035W_idr_1	20	NA
1618	YHL016C_aa_534-608	YHL016C_idr_3	20	NA
1619	YCR042C_aa_1164-1202	YCR042C_idr_7	20	NA
1620	YPR095C_aa_1173-1226	YPR095C_idr_7	20	NA
1621	YBR187W_aa_1-34	YBR187W_idr_1	20	NA
1622	YDR261C_aa_1-40	YDR261C_idr_1	20	NA
1623	YDR205W_aa_343-381	YDR205W_idr_9	20	NA
1624	YDR472W_aa_1-42	YDR472W_idr_1	20	NA
1625	YHR082C_aa_54-83	YHR082C_idr_2	20	NA
1626	YDR419W_aa_516-627	YDR419W_idr_2	20	NA
1627	YLL040C_aa_2712-2743	YLL040C_idr_59	20	NA
1628	YMR279C_aa_1-63	YMR279C_idr_1	20	NA
1629	YLR110C_aa_79-133	YLR110C_idr_2	20	NA
1630	YMR119W_aa_530-561	YMR119W_idr_6	20	NA
1631	YNL257C_aa_269-308	YNL257C_idr_20	20	NA
1632	YBR073W_aa_152-229	YBR073W_idr_8	20	NA
1633	YOR007C_aa_56-93	YOR007C_idr_2	20	NA
1634	YOR162C_aa_119-175	YOR162C_idr_9	20	NA
1635	YMR021C_aa_62-237	YMR021C_idr_3	20	NA
1636	YDL089W_aa_360-484	YDL089W_idr_4	20	NA
1637	YBR001C_aa_6-57	YBR001C_idr_2	20	NA
1638	YBR158W_aa_1-159	YBR158W_idr_1	20	NA
1639	YOR220W_aa_184-265	YOR220W_idr_4	20	NA
1640	YKL121W_aa_694-812	YKL121W_idr_9	20	NA
1641	YJR066W_aa_1-70	YJR066W_idr_1	20	NA
1642	YDR420W_aa_1421-1463	YDR420W_idr_15	20	NA
1643	YOR371C_aa_462-537	YOR371C_idr_7	20	NA
1644	YIL135C_aa_54-104	YIL135C_idr_2	20	NA
1645	YNL074C_aa_24-114	YNL074C_idr_2	20	NA
1646	YNL074C_aa_159-222	YNL074C_idr_3	20	NA
1647	YML007W_aa_190-290	YML007W_idr_7	20	NA
1648	YOR098C_aa_1-78	YOR098C_idr_1	20	NA
1649	YDR122W_aa_1-112	YDR122W_idr_1	20	NA
1650	YNL208W_aa_89-146	YNL208W_idr_2	20	NA
1651	YMR280C_aa_1-66	YMR280C_idr_1	20	NA
1652	YGL131C_aa_781-968	YGL131C_idr_4	20	NA
1653	YOR067C_aa_1-39	YOR067C_idr_1	20	NA
1654	YBL066C_aa_123-167	YBL066C_idr_4	21	G
1655	YBR105C_aa_1-52	YBR105C_idr_1	21	G
1656	YDR381W_aa_161-215	YDR381W_idr_2	21	G
1657	YIL096C_aa_1-61	YIL096C_idr_1	21	G
1658	YMR201C_aa_1-102	YMR201C_idr_1	21	G
1659	YDR210W_aa_1-42	YDR210W_idr_1	21	G
1660	YER165W_aa_444-501	YER165W_idr_5	21	G
1661	YFR051C_aa_151-285	YFR051C_idr_2	21	G
1662	YMR002W_aa_1-52	YMR002W_idr_1	21	G
1663	YMR002W_aa_84-114	YMR002W_idr_2	21	G
1664	YNL016W_aa_414-453	YNL016W_idr_4	21	G
1665	YDR214W_aa_160-208	YDR214W_idr_2	21	G
1666	YEL037C_aa_76-143	YEL037C_idr_1	21	G
1667	YGR083C_aa_1-244	YGR083C_idr_1	21	G
1668	YDL204W_aa_224-272	YDL204W_idr_2	21	G
1669	YJL080C_aa_1-109	YJL080C_idr_1	21	G
1670	YKL103C_aa_1-37	YKL103C_idr_1	21	G
1671	YLR309C_aa_258-322	YLR309C_idr_3	21	G
1672	YPL129W_aa_142-175	YPL129W_idr_2	21	G
1673	YKR095W_aa_1635-1756	YKR095W_idr_66	21	G
1674	YLR335W_aa_1-576	YLR335W_idr_1	21	G
1675	YJL041W_aa_1-636	YJL041W_idr_1	21	G
1676	YOR098C_aa_122-1076	YOR098C_idr_2	21	G
1677	YLR362W_aa_451-491	YLR362W_idr_4	21	G
1678	YDL231C_aa_415-461	YDL231C_idr_6	21	G
1679	YHR119W_aa_860-901	YHR119W_idr_4	21	G
1680	YDR223W_aa_408-439	YDR223W_idr_12	21	G
1681	YLR223C_aa_736-771	YLR223C_idr_10	21	G
1682	YKL087C_aa_19-55	YKL087C_idr_2	21	G
1683	YJR122W_aa_388-425	YJR122W_idr_3	21	G
1684	YOR329C_aa_200-239	YOR329C_idr_5	21	G
1685	YCL061C_aa_145-282	YCL061C_idr_9	21	G
1686	YDR499W_aa_26-61	YDR499W_idr_3	21	G
1687	YKL197C_aa_933-980	YKL197C_idr_7	21	G
1688	YNL297C_aa_544-599	YNL297C_idr_2	21	G
1689	YPR115W_aa_534-581	YPR115W_idr_3	21	G
1690	YDR216W_aa_447-485	YDR216W_idr_17	22	NA
1691	YER033C_aa_977-1076	YER033C_idr_2	22	NA
1692	YER132C_aa_486-581	YER132C_idr_12	22	NA
1693	YBR225W_aa_38-74	YBR225W_idr_10	22	NA
1694	YGR237C_aa_99-141	YGR237C_idr_7	22	NA
1695	YBL037W_aa_669-759	YBL037W_idr_4	22	NA
1696	YBR214W_aa_404-481	YBR214W_idr_2	22	NA
1697	YER064C_aa_104-212	YER064C_idr_2	22	NA
1698	YNL317W_aa_432-465	YNL317W_idr_3	22	NA
1699	YBL035C_aa_75-198	YBL035C_idr_2	22	NA
1700	YDR034C_aa_1-156	YDR034C_idr_1	22	NA
1701	YER075C_aa_1-91	YER075C_idr_1	22	NA
1702	YPL140C_aa_1-200	YPL140C_idr_1	22	NA
1703	YBL105C_aa_322-362	YBL105C_idr_13	22	NA
1704	YBR102C_aa_270-314	YBR102C_idr_2	22	NA
1705	YAL017W_aa_1-143	YAL017W_idr_1	22	NA
1706	YOR324C_aa_248-285	YOR324C_idr_2	22	NA
1707	YML020W_aa_1-258	YML020W_idr_1	22	NA
1708	YDR089W_aa_200-248	YDR089W_idr_1	22	NA
1709	YLR309C_aa_811-863	YLR309C_idr_17	22	NA
1710	YGR041W_aa_1-37	YGR041W_idr_1	22	NA
1711	YMR243C_aa_381-425	YMR243C_idr_3	22	NA
1712	YDR293C_aa_461-533	YDR293C_idr_10	22	NA
1713	YJL128C_aa_1-46	YJL128C_idr_1	22	NA
1714	YLR350W_aa_1-45	YLR350W_idr_1	22	NA
1715	YDR027C_aa_1-105	YDR027C_idr_1	22	NA
1716	YOL070C_aa_1-83	YOL070C_idr_1	22	NA
1717	YJL051W_aa_622-661	YJL051W_idr_15	23	NA
1718	YFL003C_aa_10-43	YFL003C_idr_2	23	NA
1719	YDR409W_aa_875-904	YDR409W_idr_6	23	NA
1720	YDR349C_aa_514-568	YDR349C_idr_7	23	NA
1721	YER069W_aa_501-536	YER069W_idr_2	23	NA
1722	YIL031W_aa_113-151	YIL031W_idr_7	23	NA
1723	YBL101C_aa_458-509	YBL101C_idr_10	23	NA
1724	YPR049C_aa_580-622	YPR049C_idr_5	23	NA
1725	YLR410W_aa_856-923	YLR410W_idr_5	23	NA
1726	YMR275C_aa_848-909	YMR275C_idr_4	23	NA
1727	YDL035C_aa_784-815	YDL035C_idr_7	23	NA
1728	YEL062W_aa_364-431	YEL062W_idr_4	23	NA
1729	YAL041W_aa_638-761	YAL041W_idr_13	23	NA
1730	YOL062C_aa_149-203	YOL062C_idr_1	23	NA
1731	YPL158C_aa_93-168	YPL158C_idr_4	23	NA
1732	YDR170C_aa_753-818	YDR170C_idr_2	23	NA
1733	YNL272C_aa_166-201	YNL272C_idr_2	23	NA
1734	YPL042C_aa_91-147	YPL042C_idr_4	23	NA
1735	YBL104C_aa_890-939	YBL104C_idr_11	23	NA
1736	YDR052C_aa_1-58	YDR052C_idr_1	23	NA
1737	YDR394W_aa_1-39	YDR394W_idr_1	23	NA
1738	YGL210W_aa_183-220	YGL210W_idr_2	23	NA
1739	YBR129C_aa_21-59	YBR129C_idr_2	23	NA
1740	YDL088C_aa_197-263	YDL088C_idr_4	23	NA
1741	YKR010C_aa_166-224	YKR010C_idr_12	23	NA
1742	YBL014C_aa_779-894	YBL014C_idr_5	23	NA
1743	YHR031C_aa_123-220	YHR031C_idr_2	23	NA
1744	YDR115W_aa_1-50	YDR115W_idr_1	23	NA
1745	YFL036W_aa_1-71	YFL036W_idr_1	23	NA
1746	YBR288C_aa_159-194	YBR288C_idr_2	23	NA
1747	YLR422W_aa_1819-1932	YLR422W_idr_30	23	NA
1748	YLR386W_aa_745-783	YLR386W_idr_3	23	NA
1749	YGL116W_aa_1-144	YGL116W_idr_1	23	NA
1750	YER016W_aa_125-194	YER016W_idr_2	23	NA
1751	YIL144W_aa_1-116	YIL144W_idr_1	23	NA
1752	YIL130W_aa_57-169	YIL130W_idr_6	23	NA
1753	YPL070W_aa_135-195	YPL070W_idr_5	23	NA
1754	YGR068C_aa_125-168	YGR068C_idr_3	23	NA
1755	YER008C_aa_1-79	YER008C_idr_1	23	NA
1756	YNL271C_aa_222-336	YNL271C_idr_27	23	NA
1757	YLL029W_aa_1-51	YLL029W_idr_1	23	NA
1758	YMR263W_aa_1-74	YMR263W_idr_1	23	NA
1759	YDR244W_aa_15-64	YDR244W_idr_3	23	NA
1760	YML041C_aa_128-168	YML041C_idr_5	23	NA
1761	YKL171W_aa_342-441	YKL171W_idr_5	23	NA
1762	YLR394W_aa_418-482	YLR394W_idr_4	23	NA
1763	YHR114W_aa_406-496	YHR114W_idr_6	23	NA
1764	YHR001W_aa_1-48	YHR001W_idr_1	23	NA
1765	YNL298W_aa_131-160	YNL298W_idr_3	23	NA
1766	YGR178C_aa_1-44	YGR178C_idr_1	23	NA
1767	YOL148C_aa_410-464	YOL148C_idr_10	23	NA
1768	YDR462W_aa_1-36	YDR462W_idr_1	23	NA
1769	YDL088C_aa_121-172	YDL088C_idr_3	23	NA
1770	YHR069C_aa_243-282	YHR069C_idr_3	23	NA
1771	YKL176C_aa_505-565	YKL176C_idr_5	23	NA
1772	YPR024W_aa_172-209	YPR024W_idr_3	23	NA
1773	YGR284C_aa_1-39	YGR284C_idr_1	23	NA
1774	YLR256W_aa_1203-1238	YLR256W_idr_8	23	NA
1775	YHR103W_aa_1-66	YHR103W_idr_1	23	NA
1776	YNL306W_aa_13-68	YNL306W_idr_2	23	NA
1777	YJL208C_aa_1-50	YJL208C_idr_1	23	NA
1778	YKL059C_aa_85-131	YKL059C_idr_2	23	NA
1779	YOL078W_aa_963-1056	YOL078W_idr_5	23	NA
1780	YML072C_aa_1255-1409	YML072C_idr_6	23	NA
1781	YER155C_aa_1664-1925	YER155C_idr_21	23	NA
1782	YMR280C_aa_1121-1164	YMR280C_idr_16	23	NA
1783	YDL106C_aa_129-207	YDL106C_idr_2	23	NA
1784	YPL156C_aa_101-150	YPL156C_idr_5	23	NA
1785	YLR371W_aa_502-645	YLR371W_idr_5	23	NA
1786	YDR167W_aa_139-174	YDR167W_idr_2	23	NA
1787	YBR138C_aa_10-43	YBR138C_idr_6	23	NA
1788	YPR095C_aa_713-747	YPR095C_idr_15	23	NA
1789	YML016C_aa_660-692	YML016C_idr_2	23	NA
1790	YDR484W_aa_290-329	YDR484W_idr_8	23	NA
1791	YJL024C_aa_162-194	YJL024C_idr_1	23	NA
1792	YJL112W_aa_1-35	YJL112W_idr_1	23	NA
1793	YLR332W_aa_191-221	YLR332W_idr_2	23	NA
1794	YMR177W_aa_115-152	YMR177W_idr_8	23	NA
1795	YOR166C_aa_1-35	YOR166C_idr_1	23	NA
1796	YPL180W_aa_96-132	YPL180W_idr_4	23	NA
1797	YDL138W_aa_724-763	YDL138W_idr_6	23	NA
1798	YER024W_aa_743-788	YER024W_idr_11	23	NA
1799	YLR084C_aa_1099-1159	YLR084C_idr_11	23	NA
1800	YPL180W_aa_657-705	YPL180W_idr_9	23	NA
1801	YAL039C_aa_1-70	YAL039C_idr_1	23	NA
1802	YIL129C_aa_245-337	YIL129C_idr_12	23	NA
1803	YPR115W_aa_615-713	YPR115W_idr_4	23	NA
1804	YGL049C_aa_808-914	YGL049C_idr_5	24	H
1805	YGR162W_aa_847-952	YGR162W_idr_6	24	H
1806	YDR146C_aa_210-284	YDR146C_idr_3	24	H
1807	YBL066C_aa_1-51	YBL066C_idr_1	24	H
1808	YLR380W_aa_29-75	YLR380W_idr_2	24	H
1809	YGR067C_aa_107-173	YGR067C_idr_8	24	H
1810	YBR086C_aa_594-946	YBR086C_idr_8	24	H
1811	YDL223C_aa_1-532	YDL223C_idr_1	24	H
1812	YDL223C_aa_617-1046	YDL223C_idr_4	24	H
1813	YGR250C_aa_1-54	YGR250C_idr_1	24	H
1814	YIL033C_aa_44-134	YIL033C_idr_2	24	H
1815	YDR207C_aa_93-154	YDR207C_idr_10	24	H
1816	YNL204C_aa_134-215	YNL204C_idr_2	24	H
1817	YPL180W_aa_1-41	YPL180W_idr_1	24	H
1818	YER119C_aa_313-349	YER119C_idr_2	24	H
1819	YHR178W_aa_88-117	YHR178W_idr_2	24	H
1820	YJR127C_aa_92-148	YJR127C_idr_17	24	H
1821	YML081W_aa_14-53	YML081W_idr_13	24	H
1822	YKR055W_aa_1-62	YKR055W_idr_1	24	H
1823	YMR166C_aa_1-31	YMR166C_idr_1	24	H
1824	YGR270W_aa_272-322	YGR270W_idr_12	24	H
1825	YDL122W_aa_59-94	YDL122W_idr_5	24	H
1826	YNL262W_aa_1-69	YNL262W_idr_1	24	H
1827	YKL179C_aa_444-485	YKL179C_idr_2	24	H
1828	YCR037C_aa_38-153	YCR037C_idr_1	24	H
1829	YJL198W_aa_38-95	YJL198W_idr_1	24	H
1830	YDR429C_aa_131-187	YDR429C_idr_2	24	H
1831	YDR392W_aa_95-132	YDR392W_idr_2	24	H
1832	YBL075C_aa_607-644	YBL075C_idr_2	24	H
1833	YPR088C_aa_442-524	YPR088C_idr_3	24	H
1834	YKL117W_aa_158-216	YKL117W_idr_3	24	H
1835	YDR330W_aa_46-90	YDR330W_idr_2	24	H
1836	YGR229C_aa_23-82	YGR229C_idr_2	24	H
1837	YIL021W_aa_268-318	YIL021W_idr_2	24	H
1838	YLR191W_aa_8-103	YLR191W_idr_2	24	H
1839	YMR039C_aa_1-35	YMR039C_idr_1	24	H
1840	YPR163C_aa_23-94	YPR163C_idr_2	24	H
1841	YGL198W_aa_1-43	YGL198W_idr_1	24	H
1842	YFL016C_aa_134-194	YFL016C_idr_3	24	H
1843	YMR214W_aa_100-137	YMR214W_idr_2	24	H
1844	YNL007C_aa_78-177	YNL007C_idr_2	24	H
1845	YNL077W_aa_80-172	YNL077W_idr_2	24	H
1846	YML017W_aa_60-96	YML017W_idr_3	24	H
1847	YKL203C_aa_1772-1813	YKL203C_idr_9	24	H
1848	YKL179C_aa_196-230	YKL179C_idr_8	24	H
1849	YLR220W_aa_8-93	YLR220W_idr_3	24	H
1850	YLR262C_aa_181-215	YLR262C_idr_2	24	H
1851	YNL262W_aa_1751-1780	YNL262W_idr_19	24	H
1852	YHR206W_aa_191-221	YHR206W_idr_3	24	H
1853	YMR216C_aa_1-135	YMR216C_idr_1	24	H
1854	YER032W_aa_35-75	YER032W_idr_5	24	H
1855	YOL060C_aa_486-608	YOL060C_idr_8	24	H
1856	YIL031W_aa_1-37	YIL031W_idr_1	24	H
1857	YJL005W_aa_1-115	YJL005W_idr_1	24	H
1858	YNL053W_aa_1-225	YNL053W_idr_1	24	H
1859	YDR171W_aa_21-50	YDR171W_idr_3	24	H
1860	YDR432W_aa_276-414	YDR432W_idr_2	24	H
1861	YCL034W_aa_158-203	YCL034W_idr_3	24	H
1862	YDR194C_aa_25-103	YDR194C_idr_3	24	H
1863	YHL034C_aa_125-168	YHL034C_idr_2	24	H
1864	YNL224C_aa_1-52	YNL224C_idr_1	24	H
1865	YDL014W_aa_1-82	YDL014W_idr_1	24	H
1866	YGR159C_aa_346-414	YGR159C_idr_3	24	H
1867	YNL112W_aa_1-56	YNL112W_idr_1	24	H
1868	YNL112W_aa_498-546	YNL112W_idr_2	24	H
1869	YML017W_aa_270-593	YML017W_idr_6	24	H
1870	YOR204W_aa_1-88	YOR204W_idr_1	24	H
1871	YPL119C_aa_1-97	YPL119C_idr_1	24	H
1872	YPR129W_aa_290-349	YPR129W_idr_5	24	H
1873	YOR204W_aa_536-604	YOR204W_idr_3	24	H
1874	YPL119C_aa_549-617	YPL119C_idr_2	24	H
1875	YMR073C_aa_1-48	YMR073C_idr_1	24	H
1876	YPL101W_aa_1-74	YPL101W_idr_1	24	H
1877	YBR150C_aa_846-1067	YBR150C_idr_7	25	I
1878	YBR275C_aa_1268-1681	YBR275C_idr_2	25	I
1879	YKL201C_aa_936-1178	YKL201C_idr_10	25	I
1880	YML071C_aa_354-522	YML071C_idr_4	25	I
1881	YHR004C_aa_1-47	YHR004C_idr_1	25	I
1882	YJL206C_aa_92-159	YJL206C_idr_2	25	I
1883	YJL016W_aa_470-561	YJL016W_idr_4	25	I
1884	YAL024C_aa_307-371	YAL024C_idr_5	25	I
1885	YCR052W_aa_272-302	YCR052W_idr_3	25	I
1886	YKR075C_aa_177-219	YKR075C_idr_7	25	I
1887	YAR019C_aa_553-604	YAR019C_idr_3	25	I
1888	YER158C_aa_424-485	YER158C_idr_2	25	I
1889	YGL056C_aa_391-483	YGL056C_idr_2	25	I
1890	YHR150W_aa_40-76	YHR150W_idr_2	25	I
1891	YER093C_aa_1-65	YER093C_idr_1	25	I
1892	YLR256W_aa_1-60	YLR256W_idr_1	25	I
1893	YFL024C_aa_1-56	YFL024C_idr_1	25	I
1894	YOL105C_aa_443-487	YOL105C_idr_7	25	I
1895	YBR203W_aa_20-103	YBR203W_idr_19	25	I
1896	YML006C_aa_636-709	YML006C_idr_3	25	I
1897	YNL309W_aa_341-393	YNL309W_idr_4	25	I
1898	YOR324C_aa_318-368	YOR324C_idr_4	25	I
1899	YKL050C_aa_1-67	YKL050C_idr_1	25	I
1900	YMR031C_aa_1-46	YMR031C_idr_1	25	I
1901	YLR049C_aa_73-104	YLR049C_idr_2	25	I
1902	YNR031C_aa_1418-1450	YNR031C_idr_11	25	I
1903	YGL071W_aa_149-207	YGL071W_idr_5	25	I
1904	YPL189W_aa_26-64	YPL189W_idr_2	25	I
1905	YDL088C_aa_63-103	YDL088C_idr_2	25	I
1906	YKR008W_aa_530-585	YKR008W_idr_3	25	I
1907	YIL130W_aa_827-938	YIL130W_idr_4	25	I
1908	YDR207C_aa_201-250	YDR207C_idr_13	25	I
1909	YDR200C_aa_1-157	YDR200C_idr_1	25	I
1910	YGL013C_aa_1-43	YGL013C_idr_1	25	I
1911	YOR066W_aa_418-544	YOR066W_idr_11	25	I
1912	YDL079C_aa_87-142	YDL079C_idr_4	25	I
1913	YBR212W_aa_434-501	YBR212W_idr_15	25	I
1914	YER045C_aa_273-390	YER045C_idr_12	25	I
1915	YNL199C_aa_22-110	YNL199C_idr_2	25	I
1916	YOR113W_aa_311-415	YOR113W_idr_19	25	I
1917	YPL089C_aa_536-604	YPL089C_idr_2	25	I
1918	YNR023W_aa_1-54	YNR023W_idr_1	25	I
1919	YHL020C_aa_267-325	YHL020C_idr_7	25	I
1920	YNL103W_aa_460-614	YNL103W_idr_8	25	I
1921	YHR159W_aa_232-301	YHR159W_idr_2	25	I
1922	YOR337W_aa_1-67	YOR337W_idr_1	25	I
1923	YML059C_aa_575-691	YML059C_idr_17	25	I
1924	YNL103W_aa_398-456	YNL103W_idr_7	25	I
1925	YFL049W_aa_347-414	YFL049W_idr_5	25	I
1926	YLR071C_aa_1-77	YLR071C_idr_1	25	I
1927	YGL150C_aa_1-41	YGL150C_idr_1	25	I
1928	YKR096W_aa_605-661	YKR096W_idr_14	25	I
1929	YNL085W_aa_345-390	YNL085W_idr_8	25	I
1930	YDR229W_aa_51-91	YDR229W_idr_2	26	NA
1931	YLR018C_aa_1-34	YLR018C_idr_1	26	NA
1932	YER032W_aa_327-743	YER032W_idr_2	26	NA
1933	YDR389W_aa_397-654	YDR389W_idr_3	26	NA
1934	YOR134W_aa_264-409	YOR134W_idr_2	26	NA
1935	YHR073W_aa_170-219	YHR073W_idr_3	26	NA
1936	YBR200W_aa_220-280	YBR200W_idr_3	26	NA
1937	YBR225W_aa_354-391	YBR225W_idr_2	26	NA
1938	YIL146C_aa_102-131	YIL146C_idr_3	26	NA
1939	YIR006C_aa_366-403	YIR006C_idr_12	26	NA
1940	YDL226C_aa_305-352	YDL226C_idr_4	26	NA
1941	YDR359C_aa_816-881	YDR359C_idr_4	26	NA
1942	YGR070W_aa_77-259	YGR070W_idr_8	26	NA
1943	YIL131C_aa_395-484	YIL131C_idr_4	26	NA
1944	YMR072W_aa_1-42	YMR072W_idr_1	26	NA
1945	YMR070W_aa_1-31	YMR070W_idr_1	26	NA
1946	YNL049C_aa_1-105	YNL049C_idr_1	26	NA
1947	YER075C_aa_351-385	YER075C_idr_14	26	NA
1948	YDR151C_aa_56-146	YDR151C_idr_2	26	NA
1949	YLR136C_aa_54-166	YLR136C_idr_3	26	NA
1950	YOR227W_aa_1102-1151	YOR227W_idr_4	26	NA
1951	YBR140C_aa_598-645	YBR140C_idr_2	26	NA
1952	YOR083W_aa_207-295	YOR083W_idr_7	26	NA
1953	YDR490C_aa_420-461	YDR490C_idr_8	26	NA
1954	YER158C_aa_208-271	YER158C_idr_10	26	NA
1955	YGL179C_aa_1-39	YGL179C_idr_1	26	NA
1956	YOL001W_aa_231-293	YOL001W_idr_4	26	NA
1957	YOR134W_aa_1-40	YOR134W_idr_1	26	NA
1958	YOR093C_aa_51-84	YOR093C_idr_10	26	NA
1959	YCL008C_aa_160-229	YCL008C_idr_2	26	NA
1960	YOR156C_aa_100-150	YOR156C_idr_2	26	NA
1961	YMR176W_aa_32-110	YMR176W_idr_12	26	NA
1962	YBR033W_aa_852-889	YBR033W_idr_8	27	J
1963	YBL005W_aa_49-194	YBL005W_idr_2	27	J
1964	YGL013C_aa_80-162	YGL013C_idr_16	27	J
1965	YDL028C_aa_1-431	YDL028C_idr_1	27	J
1966	YDR208W_aa_1-371	YDR208W_idr_1	27	J
1967	YML091C_aa_75-112	YML091C_idr_2	27	J
1968	YIL047C_aa_143-209	YIL047C_idr_3	27	J
1969	YDR169C_aa_122-268	YDR169C_idr_2	27	J
1970	YLR328W_aa_51-134	YLR328W_idr_2	27	J
1971	YLL010C_aa_1-224	YLL010C_idr_1	27	J
1972	YLR019W_aa_1-164	YLR019W_idr_1	27	J
1973	YKL062W_aa_355-478	YKL062W_idr_4	27	J
1974	YLR399C_aa_594-686	YLR399C_idr_3	27	J
1975	YIL055C_aa_1-38	YIL055C_idr_1	27	J
1976	YDR422C_aa_293-339	YDR422C_idr_4	27	J
1977	YGL066W_aa_96-223	YGL066W_idr_3	27	J
1978	YJL105W_aa_254-297	YJL105W_idr_4	27	J
1979	YPL128C_aa_490-562	YPL128C_idr_3	27	J
1980	YBL034C_aa_232-315	YBL034C_idr_10	27	J
1981	YCR033W_aa_1-483	YCR033W_idr_1	27	J
1982	YIL159W_aa_593-874	YIL159W_idr_13	27	J
1983	YGR044C_aa_46-155	YGR044C_idr_2	27	J
1984	YLR176C_aa_363-469	YLR176C_idr_3	27	J
1985	YCR091W_aa_1-315	YCR091W_idr_1	27	J
1986	YIL056W_aa_534-570	YIL056W_idr_3	27	J
1987	YIR023W_aa_188-242	YIR023W_idr_2	27	J
1988	YDL233W_aa_402-458	YDL233W_idr_3	27	J
1989	YOL148C_aa_225-274	YOL148C_idr_5	27	J
1990	YOR162C_aa_708-777	YOR162C_idr_3	27	J
1991	YIL105C_aa_588-686	YIL105C_idr_4	27	J
1992	YOL089C_aa_177-295	YOL089C_idr_4	27	J
1993	YEL043W_aa_143-201	YEL043W_idr_3	27	J
1994	YLR436C_aa_406-435	YLR436C_idr_19	27	J
1995	YNL199C_aa_435-471	YNL199C_idr_8	27	J
1996	YDR213W_aa_1-46	YDR213W_idr_1	27	J
1997	YOR208W_aa_329-385	YOR208W_idr_13	27	J
1998	YBR238C_aa_595-626	YBR238C_idr_7	27	J
1999	YOR043W_aa_308-355	YOR043W_idr_4	27	J
[truncated: 1,689 more rows]
