# Supplementary material for: Proteome-wide signatures of function in highly diverged intrinsically disordered regions
Source: eLife. 2019 Jul 2;8:e46883. doi: 10.7554/eLife.46883 (PMC6634968; doi:10.7554/eLife.46883)
Supplement: Table 1—source data 1. [file elife-46883-table1-data1.csv]

Type	Annotation	P.value	Annotated proteins in cluster / Total annotated proteins	Annotated proteins in cluster / Total proteins in cluster	Cluster.no.	Cluster.ID
GO	nucleus (GO.0005634)	1.76953150134434e-13	"201/1190"	"201/295"	5	A
GO	rRNA processing (GO.0006364)	1.10326179377038e-08	"40/117"	"40/295"	5	A
GO	ribosome biogenesis (GO.0042254)	1.33396647816675e-08	"39/114"	"39/295"	5	A
GO	nucleolus (GO.0005730)	6.05074081887017e-08	"50/179"	"50/295"	5	A
GO	maturation of SSU-rRNA from tricistronic rRNA transcript (SSU-rRNA, 5.8S rRNA, LSU-rRNA) (GO.0000462)	0.00146170135321734	"14/33"	"14/295"	5	A
GO	covalent chromatin modification (GO.0016569)	0.00323640320429261	"21/70"	"21/295"	5	A
GO	histone binding (GO.0042393)	0.00323640320429261	"11/23"	"11/295"	5	A
GO	endonucleolytic cleavage in 5'-ETS of tricistronic rRNA transcript (SSU-rRNA, 5.8S rRNA, LSU-rRNA) (GO.0000480)	0.0035408855527767	"10/20"	"10/295"	5	A
GO	small-subunit processome (GO.0032040)	0.0035408855527767	"12/28"	"12/295"	5	A
GO	preribosome, large subunit precursor (GO.0030687)	0.0043409693838483	"16/47"	"16/295"	5	A
GO	chromatin silencing at telomere (GO.0006348)	0.00647814915010124	"14/39"	"14/295"	5	A
GO	endonucleolytic cleavage to generate mature 5'-end of SSU-rRNA from (SSU-rRNA, 5.8S rRNA, LSU-rRNA) (GO.0000472)	0.00727696247737392	"10/22"	"10/295"	5	A
GO	ribosomal large subunit biogenesis (GO.0042273)	0.0143724598111239	"11/28"	"11/295"	5	A
GO	chromatin remodeling (GO.0006338)	0.0173179396412675	"14/43"	"14/295"	5	A
GO	endonucleolytic cleavage in ITS1 to separate SSU-rRNA from 5.8S rRNA and LSU-rRNA from tricistronic rRNA transcript (SSU-rRNA, 5.8S rRNA, LSU-rRNA) (GO.0000447)	0.0295695655349271	"10/26"	"10/295"	5	A
GO	nucleosome assembly (GO.0006334)	0.0295695655349271	"6/10"	"6/295"	5	A
GO	90S preribosome (GO.0030686)	0.0317869560797487	"14/46"	"14/295"	5	A
Literature	Fromont.Racine.M..et.al...2003..Ribosome.assembly.in.eukaryotes..Gene.313.17.42	5.65512414456774e-08	"40/110"	"40/295"	5	A
Literature	Granneman.S.and.Baserga.SJ..2004..Ribosome.biogenesis..of.knobs.and.RNA.processing..Exp.Cell.Res.296.1..43.50	5.65512414456774e-08	"40/110"	"40/295"	5	A
Literature	Dez.C.and.Tollervey.D..2004..Ribosome.synthesis.meets.the.cell.cycle..Curr.Opin.Microbiol.7.6..631.7	7.29540763624369e-07	"31/77"	"31/295"	5	A
Literature	On.T..et.al...2010..The.evolutionary.landscape.of.the.chromatin.modification.machinery.reveals.lineage.specific.gains..expansions..and.losses..Proteins.78.9..2075.89	2.40116238814679e-06	"59/230"	"59/295"	5	A
Literature	Wade.CH..et.al...2006..The.budding.yeast.rRNA.and.ribosome.biosynthesis..RRB..regulon.contains.over.200.genes..Yeast.23.4..293.306	7.98644630227729e-06	"37/114"	"37/295"	5	A
Literature	Breslow.DK..et.al...2008..A.comprehensive.strategy.enabling.high.resolution.functional.analysis.of.the.yeast.genome..Nat.Methods.5.8..711.8	1.15007927585125e-05	"91/452"	"91/295"	5	A
Literature	Kressler.D..et.al...2010..Driving.ribosome.assembly..Biochim.Biophys.Acta.1803.6..673.683	0.00296378964650279	"16/35"	"16/295"	5	A
Literature	Woolford.JL.Jr.and.Baserga.SJ..2013..Ribosome.Biogenesis.in.the.Yeast.Saccharomyces.cerevisiae..Genetics.195.3..643.81	0.00296378964650279	"26/81"	"26/295"	5	A
Literature	Feng.JM..et.al...2013..Origin.and.Evolution.of.the.Eukaryotic.SSU.Processome.Revealed.by.a.Comprehensive.Genomic.Analysis.and.Implications.for.the.Origin.of.the.Nucleolus..Genome.Biol.Evol.5.12..2255.67	0.0423111885706497	"13/29"	"13/295"	5	A
Literature	Oeffinger.M..et.al...2007..Comprehensive.analysis.of.diverse.ribonucleoprotein.complexes..Nat.Methods.4.11..951.6	0.0423111885706497	"37/157"	"37/295"	5	A
Literature	Robinson.KM.and.Schultz.MC..2003..Replication.independent.assembly.of.nucleosome.arrays.in.a.novel.yeast.chromatin.reconstitution.system.involves.antisilencing.factor.Asf1p.and.chromodomain.protein.Chd1p..Mol.Cell.Biol.23.22..7937.46	0.0479499300800061	"7/9"	"7/295"	5	A
Phenotype	inviable	6.68089903344712e-06	"110/613"	"110/295"	5	A
Phenotype	RNA.accumulation..decreased	4.98667923799228e-05	"46/191"	"46/295"	5	A
Phenotype	RNA.accumulation..increased	0.000397759393659654	"39/163"	"39/295"	5	A
Phenotype	cell.cycle.progression.in.G1.phase..arrested	0.000974377870900047	"15/38"	"15/295"	5	A
Phenotype	silencing..decreased	0.00825936704953435	"15/45"	"15/295"	5	A
Phenotype	cell.cycle.progression.through.the.G1.S.phase.transition..delayed	0.0112116290824815	"7/12"	"7/295"	5	A
Phenotype	chromosome.plasmid.maintenance..abnormal	0.0219681701346085	"47/254"	"47/295"	5	A
Phenotype	RNA.accumulation..absent	0.0445986207830054	"6/11"	"6/295"	5	A
GO	amino acid transmembrane transport (GO.0003333)	0.00217734077299302	"8/20"	"8/140"	6	B
GO	amino acid transmembrane transporter activity (GO.0015171)	0.00217734077299302	"8/19"	"8/140"	6	B
GO	transmembrane transport (GO.0055085)	0.00217734077299302	"21/131"	"21/140"	6	B
GO	amino acid transport (GO.0006865)	0.0110574483178311	"9/32"	"9/140"	6	B
GO	nucleolus (GO.0005730)	1.41532345507898e-12	"42/179"	"42/159"	9	C
GO	rRNA processing (GO.0006364)	3.3431385353603e-07	"27/117"	"27/159"	9	C
GO	ribosome biogenesis (GO.0042254)	6.48528148536584e-07	"26/114"	"26/159"	9	C
GO	nucleus (GO.0005634)	4.40609823131591e-06	"107/1190"	"107/159"	9	C
GO	preribosome, large subunit precursor (GO.0030687)	0.000719241447357704	"13/47"	"13/159"	9	C
GO	RNA binding (GO.0003723)	0.00481372804885445	"28/202"	"28/159"	9	C
GO	90S preribosome (GO.0030686)	0.0143666053943616	"11/46"	"11/159"	9	C
GO	helicase activity (GO.0004386)	0.0148059773467045	"14/72"	"14/159"	9	C
GO	mRNA binding (GO.0003729)	0.0240597009965618	"19/125"	"19/159"	9	C
GO	nucleic acid binding (GO.0003676)	0.0263328415083259	"22/160"	"22/159"	9	C
GO	RNA splicing (GO.0008380)	0.0263328415083259	"11/51"	"11/159"	9	C
Literature	Fromont.Racine.M..et.al...2003..Ribosome.assembly.in.eukaryotes..Gene.313.17.42	3.689923744683e-06	"27/110"	"27/159"	9	C
Literature	Granneman.S.and.Baserga.SJ..2004..Ribosome.biogenesis..of.knobs.and.RNA.processing..Exp.Cell.Res.296.1..43.50	3.689923744683e-06	"27/110"	"27/159"	9	C
Literature	Wade.CH..et.al...2006..The.budding.yeast.rRNA.and.ribosome.biosynthesis..RRB..regulon.contains.over.200.genes..Yeast.23.4..293.306	5.99220613359327e-06	"27/114"	"27/159"	9	C
Literature	Dez.C.and.Tollervey.D..2004..Ribosome.synthesis.meets.the.cell.cycle..Curr.Opin.Microbiol.7.6..631.7	3.540405062465e-05	"21/77"	"21/159"	9	C
Literature	Woolford.JL.Jr.and.Baserga.SJ..2013..Ribosome.Biogenesis.in.the.Yeast.Saccharomyces.cerevisiae..Genetics.195.3..643.81	0.00261771999003188	"19/81"	"19/159"	9	C
Literature	Lebaron.S..et.al...2005..The.splicing.ATPase.prp43p.is.a.component.of.multiple.preribosomal.particles..Mol.Cell.Biol.25.21..9269.82	0.00334399923677409	"16/60"	"16/159"	9	C
Literature	Breslow.DK..et.al...2008..A.comprehensive.strategy.enabling.high.resolution.functional.analysis.of.the.yeast.genome..Nat.Methods.5.8..711.8	0.0444923895361387	"50/452"	"50/159"	9	C
Literature	Burge.CB.et.al...1999..Splicing.of.precursors.to.mRNAs.by.the.spliceosomes..Pp..525.560.in.The.RNA.World..Second.Edition..edited.by.Gesteland.RF..Cech.TR..Atkins.JF..Cold.Spring.Harbor..NY..Cold.Spring.Harbor.Laboratory.Press	0.0444923895361387	"11/36"	"11/159"	9	C
Literature	Warkocki.Z..et.al...2009..Reconstitution.of.both.steps.of.Saccharomyces.cerevisiae.splicing.with.purified.spliceosomal.components..Nat.Struct.Mol.Biol.16.12..1237.43	0.0444923895361387	"17/81"	"17/159"	9	C
Literature	Lardelli.RM..et.al...2010..Release.of.SF3.from.the.intron.branchpoint.activates.the.first.step.of.pre.mRNA.splicing..RNA.16.3..516.28	0.0450417168754877	"10/30"	"10/159"	9	C
Phenotype	RNA.accumulation..increased	0.000134693865263924	"28/163"	"28/159"	9	C
Phenotype	inviable	0.0048781333838093	"60/613"	"60/159"	9	C
Phenotype	RNA.accumulation..decreased	0.0048781333838093	"27/191"	"27/159"	9	C
Phenotype	heat.sensitivity..increased	0.0166446741556231	"74/849"	"74/159"	9	C
GO	nucleus (GO.0005634)	2.10725559268414e-10	"72/1190"	"72/86"	10	D
GO	DNA repair (GO.0006281)	4.34491204980228e-07	"20/120"	"20/86"	10	D
GO	cellular response to DNA damage stimulus (GO.0006974)	4.52052776879524e-05	"18/129"	"18/86"	10	D
GO	DNA binding (GO.0003677)	0.000164859744405527	"28/320"	"28/86"	10	D
GO	damaged DNA binding (GO.0003684)	0.0023112864834011	"7/24"	"7/86"	10	D
GO	maintenance of DNA repeat elements (GO.0043570)	0.00416038827343432	"4/6"	"4/86"	10	D
GO	DNA-dependent ATPase activity (GO.0008094)	0.00654178884488758	"6/20"	"6/86"	10	D
GO	nucleolus (GO.0005730)	0.00825641936433605	"17/179"	"17/86"	10	D
GO	double-strand break repair (GO.0006302)	0.00825641936433605	"7/31"	"7/86"	10	D
GO	chromatin remodeling (GO.0006338)	0.00902584772010985	"8/43"	"8/86"	10	D
GO	mismatch repair (GO.0006298)	0.0115826951442341	"5/15"	"5/86"	10	D
GO	nuclear origin of replication recognition complex (GO.0005664)	0.0178834579151613	"3/4"	"3/86"	10	D
GO	mitotic sister chromatid cohesion (GO.0007064)	0.0258539348433587	"5/18"	"5/86"	10	D
Literature	On.T..et.al...2010..The.evolutionary.landscape.of.the.chromatin.modification.machinery.reveals.lineage.specific.gains..expansions..and.losses..Proteins.78.9..2075.89	1.70464241022682e-05	"28/230"	"28/86"	10	D
Literature	Cremona.CA..et.al...2012..Extensive.DNA.damage.induced.sumoylation.contributes.to.replication.and.repair.and.acts.in.addition.to.the.mec1.checkpoint..Mol.Cell.45.3..422.32	7.80792216881945e-05	"14/58"	"14/86"	10	D
Literature	Bell.SP.and.Labib.K..2016..Chromosome.Duplication.in.Saccharomyces.cerevisiae..Genetics.203.3..1027.67	0.000163100920798846	"16/85"	"16/86"	10	D
Literature	Ramos.Perez.C..et.al...2014..Yeast.cytotoxic.sensitivity.to.the.antitumour.agent...lapachone.depends.mainly.on.oxidative.stress.and.is.largely.independent.of.microtubule..or.topoisomerase.mediated.DNA.damage..Biochem.Pharmacol.92.2..206.19	0.00276098544821471	"11/46"	"11/86"	10	D
Literature	Archambault.V..et.al...2005..Disruption.of.mechanisms.that.prevent.rereplication.triggers.a.DNA.damage.response..Mol.Cell.Biol.25.15..6707.21	0.0216898270938135	"8/27"	"8/86"	10	D
Phenotype	mutation.frequency..increased	0.00355816283693035	"14/106"	"14/86"	10	D
Phenotype	chromosome.plasmid.maintenance..decreased	0.00579189486123923	"29/407"	"29/86"	10	D
Phenotype	cell.cycle.progression.in.S.phase..increased.duration	0.0421269148103142	"4/10"	"4/86"	10	D
Phenotype	chromosome.plasmid.maintenance..abnormal	0.0438923062485357	"19/254"	"19/86"	10	D
Phenotype	colony.sectoring..increased	0.0438923062485357	"20/275"	"20/86"	10	D
Phenotype	spore.germination..decreased	0.0438923062485357	"6/30"	"6/86"	10	D
GO	motor activity (GO.0003774)	0.0422696729094175	"4/8"	"4/89"	13	E
GO	ATP binding (GO.0005524)	0.0422696729094175	"25/330"	"25/89"	13	E
GO	ASTRA complex (GO.0070209)	0.0422696729094175	"3/3"	"3/89"	13	E
GO	90S preribosome (GO.0030686)	3.71741783459928e-05	"11/46"	"11/73"	14	F
GO	rRNA processing (GO.0006364)	0.00128359422762515	"14/117"	"14/73"	14	F
GO	ribosome biogenesis (GO.0042254)	0.00128359422762515	"14/114"	"14/73"	14	F
GO	endonucleolytic cleavage in ITS1 to separate SSU-rRNA from 5.8S rRNA and LSU-rRNA from tricistronic rRNA transcript (SSU-rRNA, 5.8S rRNA, LSU-rRNA) (GO.0000447)	0.0229011410670777	"6/26"	"6/73"	14	F
GO	nucleolus (GO.0005730)	0.024884371678811	"15/179"	"15/73"	14	F
GO	ATPase activity (GO.0016887)	0.024884371678811	"9/69"	"9/73"	14	F
GO	helicase activity (GO.0004386)	0.0299398916067595	"9/72"	"9/73"	14	F
Literature	Fromont.Racine.M..et.al...2003..Ribosome.assembly.in.eukaryotes..Gene.313.17.42	0.0457084479657389	"14/110"	"14/73"	14	F
Literature	Granneman.S.and.Baserga.SJ..2004..Ribosome.biogenesis..of.knobs.and.RNA.processing..Exp.Cell.Res.296.1..43.50	0.0457084479657389	"14/110"	"14/73"	14	F
Literature	Wade.CH..et.al...2006..The.budding.yeast.rRNA.and.ribosome.biosynthesis..RRB..regulon.contains.over.200.genes..Yeast.23.4..293.306	0.0474889047112185	"14/114"	"14/73"	14	F
GO	nuclear pore nuclear basket (GO.0044615)	0.00518653721699748	"4/9"	"4/35"	21	G
GO	nucleocytoplasmic transporter activity (GO.0005487)	0.0453764793091317	"4/17"	"4/35"	21	G
GO	nucleic acid binding (GO.0003676)	0.000941131347829927	"16/160"	"16/66"	24	H
GO	translational initiation (GO.0006413)	0.000941131347829927	"7/24"	"7/66"	24	H
GO	cytoplasmic stress granule (GO.0010494)	0.00119123603723094	"9/49"	"9/66"	24	H
GO	mRNA binding (GO.0003729)	0.0035053842845722	"13/125"	"13/66"	24	H
GO	translation initiation factor activity (GO.0003743)	0.00359653144084029	"6/22"	"6/66"	24	H
GO	eukaryotic translation initiation factor 4F complex (GO.0016281)	0.00409605867491807	"3/3"	"3/66"	24	H
GO	protein folding (GO.0006457)	0.00922529146818317	"6/27"	"6/66"	24	H
GO	RNA binding (GO.0003723)	0.0175750608299112	"15/202"	"15/66"	24	H
GO	unfolded protein binding (GO.0051082)	0.0175750608299112	"6/31"	"6/66"	24	H
Literature	Plank.M..et.al...2015..Expanding.the.yeast.protein.arginine.methylome..Proteomics.15.18..3232.43	1.37299757190106e-06	"8/11"	"8/66"	24	H
Literature	Rajyaguru.P.and.Parker.R..2012..RGG.motif.proteins..modulators.of.mRNA.functional.states..Cell.Cycle.11.14..2594.9	5.79596043332347e-05	"6/7"	"6/66"	24	H
Literature	Hinnebusch.AG..2011..Molecular.mechanism.of.scanning.and.start.codon.selection.in.eukaryotes..Microbiol.Mol.Biol.Rev.75.3..434.67	0.00331454919786623	"7/18"	"7/66"	24	H
Literature	Jain.S..et.al...2016..ATPase.Modulated.Stress.Granules.Contain.a.Diverse.Proteome.and.Substructure..Cell.164.3..487.98	0.0076102758142936	"10/53"	"10/66"	24	H
Literature	Rajyaguru.P..et.al...2012..Scd6.Targets.eIF4G.to.Repress.Translation..RGG.Motif.Proteins.as.a.Class.of.eIF4G.Binding.Proteins..Mol.Cell.45.2..244.54	0.0076102758142936	"5/8"	"5/66"	24	H
Literature	Altmann.M.and.Linder.P..2010..Power.of.yeast.for.analysis.of.eukaryotic.translation.initiation..J.Biol.Chem.285.42..31907.12	0.0139908102038037	"5/9"	"5/66"	24	H
Literature	Russell.ID.and.Tollervey.D..1992..NOP3.is.an.essential.yeast.protein.which.is.required.for.pre.rRNA.processing..J.Cell.Biol.119.4..737.47	0.0212148850509204	"4/5"	"4/66"	24	H
GO	regulation of transcription, DNA-templated (GO.0006355)	0.000142403422391599	"23/366"	"23/52"	25	I
GO	transcription, DNA-templated (GO.0006351)	0.000394617470472117	"22/368"	"22/52"	25	I
GO	positive regulation of transcription from RNA polymerase II promoter (GO.0045944)	0.00658214418387924	"12/141"	"12/52"	25	I
GO	RNA polymerase II transcription factor activity, sequence-specific DNA binding (GO.0000981)	0.00022880330383329	"10/62"	"10/52"	27	J
GO	positive regulation of transcription from RNA polymerase II promoter (GO.0045944)	0.00022880330383329	"14/141"	"14/52"	27	J
GO	regulation of transcription, DNA-templated (GO.0006355)	0.00110763917988333	"21/366"	"21/52"	27	J
GO	RNA polymerase II core promoter proximal region sequence-specific DNA binding (GO.0000978)	0.001945905340663	"9/68"	"9/52"	27	J
GO	transcription, DNA-templated (GO.0006351)	0.0122173646244298	"19/368"	"19/52"	27	J
Literature	Akache.B.and.Turcotte.B..2002..New.regulators.of.drug.sensitivity.in.the.family.of.yeast.zinc.cluster.proteins..J.Biol.Chem.277.24..21254.60	0.0143752136605639	"7/28"	"7/52"	27	J
Literature	Gordan.R..et.al...2011..Curated.collection.of.yeast.transcription.factor.DNA.binding.specificity.data.reveals.novel.structural.and.gene.regulatory.insights..Genome.Biol.12.12..R125	0.0143752136605639	"13/120"	"13/52"	27	J
Literature	Kaida.D..et.al...2002..Yeast.Whi2.and.Psr1.phosphatase.form.a.complex.and.regulate.STRE.mediated.gene.expression..Genes.Cells.7.6..543.52	0.0143752136605639	"4/5"	"4/52"	27	J
Literature	Todd.RB.and.Andrianopoulos.A..1997..Evolution.of.a.fungal.regulatory.gene.family..the.Zn.II.2Cys6.binuclear.cluster.DNA.binding.motif..Fungal.Genet.Biol.21.3..388.405	0.0143752136605639	"8/40"	"8/52"	27	J
Literature	MacPherson.S..et.al...2006..A.fungal.family.of.transcriptional.regulators..the.zinc.cluster.proteins..Microbiol.Mol.Biol.Rev.70.3..583.604	0.019727738010083	"8/43"	"8/52"	27	J
GO	trehalose biosynthetic process (GO.0005992)	0.0381247483640355	"2/2"	"2/19"	30	K
GO	Golgi to endosome transport (GO.0006895)	0.0381247483640355	"3/12"	"3/19"	30	K
GO	ubiquitin binding (GO.0043130)	0.0381247483640355	"4/33"	"4/19"	30	K
Literature	Fang.P..et.al...2010..Structural.basis.for.the.specificity.of.the.GAE.domain.of.yGGA2.for.its.accessory.proteins.Ent3.and.Ent5..Biochemistry.49.36..7949.55	0.0263888534682089	"3/4"	"3/19"	30	K
Literature	Myers.MD.and.Payne.GS..2013..Clathrin..adaptors.and.disease..Insights.from.the.yeast.Saccharomyces.cerevisiae..Front.Biosci.18...862.91	0.0263888534682089	"4/11"	"4/19"	30	K
Literature	Panek.AC..et.al...1990..Regulation.of.trehalose.metabolism.in.Saccharomyces.cerevisiae.mutants.during.temperature.shifts..Biochimie.72.1..77.9	0.0263888534682089	"3/4"	"3/19"	30	K
Literature	Vandercammen.A..et.al...1989..Characterization.of.trehalose.6.phosphate.synthase.and.trehalose.6.phosphate.phosphatase.of.Saccharomyces.cerevisiae..Eur.J.Biochem.182.3..613.20	0.0263888534682089	"3/4"	"3/19"	30	K
GO	sequence-specific DNA binding (GO.0043565)	3.17961378574776e-09	"21/125"	"21/70"	31	L
GO	RNA polymerase II core promoter proximal region sequence-specific DNA binding (GO.0000978)	6.24870334891809e-06	"13/68"	"13/70"	31	L
GO	DNA binding (GO.0003677)	6.24870334891809e-06	"27/320"	"27/70"	31	L
GO	positive regulation of transcription from RNA polymerase II promoter (GO.0045944)	2.95230771185763e-05	"17/141"	"17/70"	31	L
GO	regulation of transcription, DNA-templated (GO.0006355)	6.74733674974088e-05	"27/366"	"27/70"	31	L
GO	RNA polymerase II transcription factor binding (GO.0001085)	0.000724632734965574	"5/10"	"5/70"	31	L
GO	RNA polymerase II transcription factor activity, sequence-specific DNA binding (GO.0000981)	0.000809389240276627	"10/62"	"10/70"	31	L
GO	transcription, DNA-templated (GO.0006351)	0.00255330155877012	"24/368"	"24/70"	31	L
GO	transcription factor activity, sequence-specific DNA binding (GO.0003700)	0.0069086952479406	"8/50"	"8/70"	31	L
GO	metal ion binding (GO.0046872)	0.0071256566324391	"22/343"	"22/70"	31	L
GO	transcription factor activity, RNA polymerase II core promoter proximal region sequence-specific binding (GO.0000982)	0.00838007961001367	"5/17"	"5/70"	31	L
GO	transcriptional repressor activity, RNA polymerase II core promoter proximal region sequence-specific binding (GO.0001078)	0.0104157138062898	"5/18"	"5/70"	31	L
GO	zinc ion binding (GO.0008270)	0.0168523694539223	"10/93"	"10/70"	31	L
GO	nitrogen catabolite activation of transcription from RNA polymerase II promoter (GO.0001080)	0.0369762462286281	"3/6"	"3/70"	31	L
GO	regulation of glycolytic process by positive regulation of transcription from RNA polymerase II promoter (GO.0072363)	0.0369762462286281	"3/6"	"3/70"	31	L
GO	transcriptional activator activity, RNA polymerase II core promoter proximal region sequence-specific binding (GO.0001077)	0.0423599365679187	"7/53"	"7/70"	31	L
Literature	Beskow.A.and.Wright.AP..2006..Comparative.analysis.of.regulatory.transcription.factors.in.Schizosaccharomyces.pombe.and.budding.yeasts..Yeast.23.13..929.35	3.19318166551559e-10	"26/159"	"26/70"	31	L
Literature	Jothi.R..et.al...2009..Genomic.analysis.reveals.a.tight.link.between.transcription.factor.dynamics.and.regulatory.network.architecture..Mol.Syst.Biol.5.294	5.65463644776742e-09	"21/110"	"21/70"	31	L
Literature	Gordan.R..et.al...2011..Curated.collection.of.yeast.transcription.factor.DNA.binding.specificity.data.reveals.novel.structural.and.gene.regulatory.insights..Genome.Biol.12.12..R125	2.32657786900424e-08	"21/120"	"21/70"	31	L
Literature	Zheng.J..et.al...2010..Epistatic.relationships.reveal.the.functional.organization.of.yeast.transcription.factors..Mol.Syst.Biol.6...420	6.76758863803567e-07	"26/230"	"26/70"	31	L
Literature	Yu.H.and.Gerstein.M..2006..Genomic.analysis.of.the.hierarchical.structure.of.regulatory.networks..Proc.Natl.Acad.Sci.U.S.A.103.40..14724.31	1.08510540274262e-06	"25/218"	"25/70"	31	L
Literature	Babbitt.GA..2010..Relaxed.selection.against.accidental.binding.of.transcription.factors.with.conserved.chromatin.contexts..Gene.466.1.2..43.8	5.75749385069758e-05	"14/76"	"14/70"	31	L
Literature	Bussereau.F..et.al...2006..The.Kluyveromyces.lactis.repertoire.of.transcriptional.regulators..FEMS.Yeast.Res.6.3..325.35	5.75749385069758e-05	"15/89"	"15/70"	31	L
Literature	Swiecilo.A..2016..Cross.stress.resistance.in.Saccharomyces.cerevisiae.yeast.new.insight.into.an.old.phenomenon..Cell.Stress.Chaperones.21.2..187.200	9.40627233409857e-05	"9/26"	"9/70"	31	L
Literature	Musso.G..et.al...2008..The.extensive.and.condition.dependent.nature.of.epistasis.among.whole.genome.duplicates.in.yeast..Genome.Res.18.7..1092.9	0.000941312805267393	"7/17"	"7/70"	31	L
Literature	Zhao.Y..et.al...2008..Development.of.a.Novel.Oligonucleotide.Array.Based.Transcription.Factor.Assay.Platform.for.Genome.Wide.Active.Transcription.Factor.Profiling.in.Saccharomyces.cerevisiae..J.Proteome.Res.7.3..1315.1325	0.000941312805267393	"13/81"	"13/70"	31	L
Literature	Wu.WS.and.Chen.BS..2009..Identifying.Stress.Transcription.Factors.Using.Gene.Expression.and.TF.Gene.Association.Data..Bioinform.Biol.Insights.1...137.45	0.00319870237372318	"7/20"	"7/70"	31	L
Literature	Yu.T.and.Li.KC..2005..Inference.of.transcriptional.regulatory.network.by.two.stage.constrained.space.factor.analysis..Bioinformatics.21.21..4033.8	0.00635174285504762	"10/54"	"10/70"	31	L
Literature	Morozov.AV.and.Siggia.ED..2007..Connecting.protein.structure.with.predictions.of.regulatory.sites..Proc.Natl.Acad.Sci.U.S.A.104.17..7068.73	0.00835890896545113	"10/56"	"10/70"	31	L
Literature	Conrad.M..et.al...2014..Nutrient.sensing.and.signaling.in.the.yeast.Saccharomyces.cerevisiae..FEMS.Microbiol.Rev.38.2..254.99	0.0155922873301142	"13/106"	"13/70"	31	L
Literature	Engelberg.D..et.al...2014..Transmembrane.signaling.in.Saccharomyces.cerevisiae.as.a.model.for.signaling.in.metazoans..state.of.the.art.after.25.years..Cell.Signal.26.12..2865.78	0.0180550481123434	"13/108"	"13/70"	31	L
Literature	Lai.WK.and.Buck.MJ..2013..An.integrative.approach.to.understanding.the.combinatorial.histone.code.at.functional.elements..Bioinformatics.29.18..2231.7	0.0255355825086537	"9/51"	"9/70"	31	L
Literature	Shah.AN..et.al...2011..Deletion.of.a.subgroup.of.ribosome.related.genes.minimizes.hypoxia.induced.changes.and.confers.hypoxia.tolerance..Physiol.Genomics.43.14..855.72	0.0255355825086537	"7/28"	"7/70"	31	L
Literature	Siddharthan.R..et.al...2005..PhyloGibbs..a.Gibbs.sampling.motif.finder.that.incorporates.phylogeny..PLoS.Comput.Biol.1.7..e67	0.0255355825086537	"8/39"	"8/70"	31	L
Literature	Geertz.M..et.al...2012..Massively.parallel.measurements.of.molecular.interaction.kinetics.on.a.microfluidic.platform..Proc.Natl.Acad.Sci.U.S.A.109.41..16540.5	0.0263955998142889	"6/19"	"6/70"	31	L
Literature	Rojas.M..et.al...2008..Selective.inhibition.of.yeast.regulons.by.daunorubicin..a.transcriptome.wide.analysis..BMC.Genomics.9.358	0.0372952971868125	"7/30"	"7/70"	31	L
GO	structural constituent of nuclear pore (GO.0017056)	1.17335212444593e-06	"8/18"	"8/54"	32	M
GO	protein targeting to nuclear inner membrane (GO.0036228)	1.47876465874719e-05	"5/6"	"5/54"	32	M
GO	nuclear pore central transport channel (GO.0044613)	2.63867374098166e-05	"6/12"	"6/54"	32	M
GO	mRNA transport (GO.0051028)	5.67677985919014e-05	"9/44"	"9/54"	32	M
GO	nuclear pore (GO.0005643)	5.86690799073449e-05	"8/33"	"8/54"	32	M
GO	protein import into nucleus (GO.0006606)	0.000104555819541542	"7/25"	"7/54"	32	M
GO	nucleocytoplasmic transporter activity (GO.0005487)	0.000139864892919893	"6/17"	"6/54"	32	M
GO	nuclear membrane (GO.0031965)	0.000560305691004664	"8/46"	"8/54"	32	M
GO	posttranscriptional tethering of RNA polymerase II gene DNA at nuclear periphery (GO.0000973)	0.000631061523376309	"5/13"	"5/54"	32	M
GO	nuclear pore cytoplasmic filaments (GO.0044614)	0.00171607127521317	"4/8"	"4/54"	32	M
GO	protein transport (GO.0015031)	0.00519113297213483	"14/202"	"14/54"	32	M
GO	NLS-bearing protein import into nucleus (GO.0006607)	0.00950648195239698	"4/12"	"4/54"	32	M
GO	telomere tethering at nuclear periphery (GO.0034398)	0.0172060090198064	"4/14"	"4/54"	32	M
GO	poly(A)+ mRNA export from nucleus (GO.0016973)	0.0290828541852295	"5/29"	"5/54"	32	M
GO	nuclear localization sequence binding (GO.0008139)	0.029299493339331	"3/7"	"3/54"	32	M
Literature	Alberti.S..et.al...2009..A.systematic.survey.identifies.prions.and.illuminates.sequence.features.of.prionogenic.proteins..Cell.137.1..146.58	4.96778490047709e-08	"17/91"	"17/54"	32	M
Literature	Peyro.M..et.al...2015..Nucleoporin.s.Like.Charge.Regions.Are.Major.Regulators.of.FG.Coverage.and.Dynamics.Inside.the.Nuclear.Pore.Complex..PLoS.One.10.12..e0143745	1.10278768604732e-05	"6/7"	"6/54"	32	M
Literature	Stutz.F..et.al...1996..A.role.for.nucleoporin.FG.repeat.domains.in.export.of.human.immunodeficiency.virus.type.1.Rev.protein.and.RNA.from.the.nucleus..Mol.Cell.Biol.16.12..7144.50	1.10278768604732e-05	"6/7"	"6/54"	32	M
Literature	Winey.M..et.al...1997..Nuclear.pore.complex.number.and.distribution.throughout.the.Saccharomyces.cerevisiae.cell.cycle.by.three.dimensional.reconstruction.from.electron.micrographs.of.nuclear.envelopes..Mol.Biol.Cell.8.11..2119.32	1.49430388068033e-05	"8/18"	"8/54"	32	M
Literature	Yang.Q..et.al...1998..Three.dimensional.architecture.of.the.isolated.yeast.nuclear.pore.complex..functional.and.evolutionary.implications..Mol.Cell.1.2..223.34	2.0323369078582e-05	"8/19"	"8/54"	32	M
Literature	Devos.D..et.al...2006..Simple.fold.composition.and.modular.architecture.of.the.nuclear.pore.complex..Proc.Natl.Acad.Sci.U.S.A.103.7..2172.7	2.94480642007833e-05	"8/21"	"8/54"	32	M
Literature	Iovine.MK..et.al...1995..The.GLFG.repetitive.region.of.the.nucleoporin.Nup116p.interacts.with.Kap95p..an.essential.yeast.nuclear.import.factor..J.Cell.Biol.131.6.Pt.2..1699.713	2.94480642007833e-05	"5/5"	"5/54"	32	M
Literature	Iwamoto.M..et.al...2013..Monoclonal.antibodies.recognize.gly.leu.phe.gly.repeat.of.nucleoporin.nup98.of.tetrahymena..yeasts..and.humans..Monoclon.Antib.Immunodiagn.Immunother.32.2..81.90	2.94480642007833e-05	"5/5"	"5/54"	32	M
Literature	Patel.SS..et.al...2007..Natively.unfolded.nucleoporins.gate.protein.diffusion.across.the.nuclear.pore.complex..Cell.129.1..83.96	2.94480642007833e-05	"8/21"	"8/54"	32	M
Literature	Alber.F..et.al...2007..Determining.the.architectures.of.macromolecular.assemblies..Nature.450.7170..683.94	3.72652649476566e-05	"8/22"	"8/54"	32	M
Literature	Alber.F..et.al...2007..The.molecular.architecture.of.the.nuclear.pore.complex..Nature.450.7170..695.701	3.72652649476566e-05	"8/22"	"8/54"	32	M
Literature	Fabre.E.and.Hurt.E..1997..Yeast.genetics.to.dissect.the.nuclear.pore.complex.and.nucleocytoplasmic.trafficking..Annu.Rev.Genet.31.277.313	4.4188318989952e-05	"9/32"	"9/54"	32	M
Literature	Fernandez.Martinez.J.and.Rout.MP..2009..Nuclear.pore.complex.biogenesis..Curr.Opin.Cell.Biol.21.4..603.12	4.4188318989952e-05	"8/23"	"8/54"	32	M
Literature	Hayakawa.A..et.al...2012..Ubiquitylation.of.the.nuclear.pore.complex.controls.nuclear.migration.during.mitosis.in.S..cerevisiae..J.Cell.Biol.196.1..19.27	4.4188318989952e-05	"8/23"	"8/54"	32	M
Literature	Beliakova.Bethell.N..et.al...2009..Ty3.nuclear.entry.is.initiated.by.viruslike.particle.docking.on.GLFG.nucleoporins..J.Virol.83.22..11914.25	5.25649307693582e-05	"6/10"	"6/54"	32	M
Literature	D.Angelo.MA.and.Hetzer.MW..2008..Structure..dynamics.and.function.of.nuclear.pore.complexes..Trends.Cell.Biol.18.10..456.66	5.25649307693582e-05	"8/24"	"8/54"	32	M
Literature	Denning.DP..et.al...2003..Disorder.in.the.nuclear.pore.complex..the.FG.repeat.regions.of.nucleoporins.are.natively.unfolded..Proc.Natl.Acad.Sci.U.S.A.100.5..2450.5	5.25649307693582e-05	"8/24"	"8/54"	32	M
Literature	Terry.LJ.and.Wente.SR..2009..Flexible.gates..dynamic.topologies.and.functions.for.FG.nucleoporins.in.nucleocytoplasmic.transport..Eukaryot.Cell.8.12..1814.27	5.25649307693582e-05	"6/10"	"6/54"	32	M
Literature	Suntharalingam.M.and.Wente.SR..2003..Peering.through.the.pore..nuclear.pore.complex.structure..assembly..and.function..Dev.Cell.4.6..775.89	6.60981207010954e-05	"8/25"	"8/54"	32	M
Literature	Vasu.SK.and.Forbes.DJ..2001..Nuclear.pores.and.nuclear.assembly..Curr.Opin.Cell.Biol.13.3..363.75	6.60981207010954e-05	"8/25"	"8/54"	32	M
Literature	Akey.CW..2010..The.NPC.Transporter..A.Ghost.in.the.Machine..Structure.18.10..1230.2	9.31207997065342e-05	"6/11"	"6/54"	32	M
Literature	Yamada.J..et.al...2010..A.bimodal.distribution.of.two.distinct.categories.of.intrinsically.disordered.structures.with.separate.functions.in.FG.nucleoporins..Mol.Cell.Proteomics.9.10..2205.24	9.31207997065342e-05	"6/11"	"6/54"	32	M
Literature	Mi.L..et.al...2015..Quantifying.Nucleoporin.Stoichiometry.Inside.Single.Nuclear.Pore.Complexes.In.vivo..Sci.Rep.5...9372	0.000153599423429193	"7/19"	"7/54"	32	M
Literature	Theisen.U..et.al...2008..Dynamic.rearrangement.of.nucleoporins.during.fungal..quot.open.quot..mitosis..Mol.Biol.Cell.19.3..1230.40	0.000153599423429193	"7/19"	"7/54"	32	M
Literature	Strawn.LA..et.al...2004..Minimal.nuclear.pore.complexes.define.FG.repeat.domains.essential.for.transport..Nat.Cell.Biol.6.3..197.206	0.000155097270022649	"6/12"	"6/54"	32	M
Literature	Tagliazucchi.M..et.al...2013..Effect.of.charge..hydrophobicity..and.sequence.of.nucleoporins.on.the.translocation.of.model.particles.through.the.nuclear.pore.complex..Proc.Natl.Acad.Sci.U.S.A.110.9..3363.8	0.000155097270022649	"6/12"	"6/54"	32	M
Literature	Adam.SA..2001..The.nuclear.pore.complex..Genome.Biol.2.9..REVIEWS0007	0.000424781395128507	"8/32"	"8/54"	32	M
Literature	Wente.SR..et.al...1997..The.nucleus.and.nucleocytoplasmic.transport.in.Saccharomyces.cerevisiae..Pp..471.546.in.The.Molecular.and.Cellular.Biology.of.the.Yeast.Saccharomyces..Cell.Cycle.and.Cell.Biology..edited.by.Pringle.JR..Broach.JR.and.Jones.EW..Cold.Spring.Harbor..NY..Cold.Spring.Harbor.Laboratory.Press	0.000424781395128507	"7/22"	"7/54"	32	M
Literature	Halfmann.R..et.al...2012..Prion.formation.by.a.yeast.GLFG.nucleoporin..Prion.6.4..391.9	0.000442858384872532	"4/4"	"4/54"	32	M
Literature	Neville.M..et.al...1997..The.importin.beta.family.member.Crm1p.bridges.the.interaction.between.Rev.and.the.nuclear.pore.complex.during.nuclear.export..Curr.Biol.7.10..767.75	0.000442858384872532	"4/4"	"4/54"	32	M
Literature	Taddei.A..2007..Active.genes.at.the.nuclear.pore.complex..Curr.Opin.Cell.Biol.19.3..305.310	0.000482045618207106	"8/33"	"8/54"	32	M
Literature	Aitchison.JD.and.Rout.MP..2012..The.yeast.nuclear.pore.complex.and.transport.through.it..Genetics.190.3..855.83	0.000601031616442118	"8/34"	"8/54"	32	M
Literature	Leducq.JB..et.al...2012..Evidence.for.the.robustness.of.protein.complexes.to.inter.species.hybridization..PLoS.Genet.8.12..e1003161	0.000612442576431098	"6/15"	"6/54"	32	M
Literature	Lutzmann.M..et.al...2005..Reconstitution.of.Nup157.and.Nup145N.into.the.Nup84.complex..J.Biol.Chem.280.18..18442.51	0.000612442576431098	"6/15"	"6/54"	32	M
Literature	Bonnet.A.and.Palancade.B..2014..Regulation.of.mRNA.trafficking.by.nuclear.pore.complexes..Genes..Basel..5.3..767.91	0.000681616472803945	"8/35"	"8/54"	32	M
Literature	Steinberg.G..et.al...2012..Motor.driven.motility.of.fungal.nuclear.pores.organizes.chromosomes.and.fosters.nucleocytoplasmic.transport..J.Cell.Biol.198.3..343.55	0.000681616472803945	"8/35"	"8/54"	32	M
Literature	Allen.NP..et.al...2001..Proteomic.analysis.of.nucleoporin.interacting.proteins..J.Biol.Chem.276.31..29268.74	0.000815496564645768	"5/9"	"5/54"	32	M
Literature	Terry.LJ..et.al...2007..Crossing.the.nuclear.envelope..hierarchical.regulation.of.nucleocytoplasmic.transport..Science.318.5855..1412.6	0.000840981449016371	"7/25"	"7/54"	32	M
Literature	Tamura.K..et.al...2010..Identification.and.Characterization.of.Nuclear.Pore.Complex.Components.in.Arabidopsis.thaliana..Plant.Cell.22.12..4084.4097	0.00127882966430204	"6/17"	"6/54"	32	M
Literature	Terry.LJ.and.Wente.SR..2007..Nuclear.mRNA.export.requires.specific.FG.nucleoporins.for.translocation.through.the.nuclear.pore.complex..J.Cell.Biol.178.7..1121.32	0.00144879456170581	"5/10"	"5/54"	32	M
Literature	Tetenbaum.Novatt.J..et.al...2012..Nucleocytoplasmic.transport..a.role.for.nonspecific.competition.in.karyopherin.nucleoporin.interactions..Mol.Cell.Proteomics.11.5..31.46	0.00144879456170581	"5/10"	"5/54"	32	M
Literature	Fiserova.J..et.al...2014..Entry.into.the.nuclear.pore.complex.is.controlled.by.a.cytoplasmic.exclusion.zone.containing.dynamic.GLFG.repeat.nucleoporin.domains..J.Cell.Sci.127.Pt.1..124.36	0.001521124341996	"4/5"	"4/54"	32	M
Literature	Frey.S..et.al...2006..FG.rich.repeats.of.nuclear.pore.proteins.form.a.three.dimensional.meshwork.with.hydrogel.like.properties..Science.314.5800..815.7	0.001521124341996	"4/5"	"4/54"	32	M
Literature	Ando.D..et.al...2013..Physical.motif.clustering.within.intrinsically.disordered.nucleoporin.sequences.reveals.universal.functional.features..PLoS.One.8.9..e73831	0.00238208540504298	"5/11"	"5/54"	32	M
Literature	Kriwacki.RW.and.Yoon.MK..2011..Cell.biology..Fishing.in.the.nuclear.pore..Science.333.6038..44.5	0.00238208540504298	"5/11"	"5/54"	32	M
Literature	Rout.MP..et.al...2000..The.yeast.nuclear.pore.complex..composition..architecture..and.transport.mechanism..J.Cell.Biol.148.4..635.51	0.00239310066582006	"8/42"	"8/54"	32	M
Literature	Harbi.D.and.Harrison.PM..2014..Interaction.networks.of.prion..prionogenic.and.prion.like.proteins.in.budding.yeast..and.their.role.in.gene.regulation..PLoS.One.9.6..e100615	0.00340673841417567	"8/44"	"8/54"	32	M
Literature	Denning.DP.and.Rexach.MF..2007..Rapid.evolution.exposes.the.boundaries.of.domain.structure.and.function.in.natively.unfolded.FG.nucleoporins..Mol.Cell.Proteomics.6.2..272.82	0.00376834367148888	"5/12"	"5/54"	32	M
Literature	Miao.M..et.al...2006..The.integral.membrane.protein.pom34p.functionally.links.nucleoporin.subcomplexes..Genetics.172.3..1441.57	0.00590457553237871	"5/13"	"5/54"	32	M
Literature	Mans.BJ..et.al...2004..Comparative.genomics..evolution.and.origins.of.the.nuclear.envelope.and.nuclear.pore.complex..Cell.Cycle.3.12..1612.37	0.00619552689528903	"7/34"	"7/54"	32	M
Literature	Davis.LI..1995..The.nuclear.pore.complex..Annu.Rev.Biochem.64.865.96	0.00822050097007691	"5/14"	"5/54"	32	M
Literature	Liu.G..et.al...2015..Gene.Essentiality.Is.a.Quantitative.Property.Linked.to.Cellular.Evolvability..Cell.163.6..1388.99	0.00822050097007691	"4/7"	"4/54"	32	M
Literature	Meinema.AC..et.al...2011..Long.unfolded.linkers.facilitate.membrane.protein.import.through.the.nuclear.pore.complex..Science.333.6038..90.3	0.00822050097007691	"4/7"	"4/54"	32	M
Literature	Pante.N.and.Aebi.U..1996..Molecular.dissection.of.the.nuclear.pore.complex..Crit.Rev.Biochem.Mol.Biol.31.2..153.99	0.00822050097007691	"5/14"	"5/54"	32	M
Literature	Azimi.M.and.Mofrad.MR..2013..Higher.nucleoporin.importinbeta.affinity.at.the.nuclear.basket.increases.nucleocytoplasmic.import..PLoS.One.8.11..e81741	0.0113102558097348	"5/15"	"5/54"	32	M
Literature	Light.WH..et.al...2010..Interaction.of.a.DNA.Zip.code.with.the.nuclear.pore.complex.promotes.H2A.Z.incorporation.and.INO1.transcriptional.memory..Mol.Cell.40.1..112.25	0.0113102558097348	"6/25"	"6/54"	32	M
Literature	Ratner.GA..et.al...2007..Molecular.Determinants.of.Binding.between.Gly.Leu.Phe.Gly.Nucleoporins.and.the.Nuclear.Pore.Complex..J.Biol.Chem.282.47..33968.76	0.0113102558097348	"3/3"	"3/54"	32	M
Literature	Robinson.MA..et.al...2005..Multiple.conformations.in.the.ligand.binding.site.of.the.yeast.nuclear.pore.targeting.domain.of.Nup116p..J.Biol.Chem.280.42..35723.32	0.0113102558097348	"3/3"	"3/54"	32	M
Literature	Wente.SR.and.Blobel.G..1994..NUP145.encodes.a.novel.yeast.glycine.leucine.phenylalanine.glycine..GLFG..nucleoporin.required.for.nuclear.envelope.structure..J.Cell.Biol.125.5..955.69	0.0113102558097348	"3/3"	"3/54"	32	M
Literature	Wente.SR..et.al...1992..A.new.family.of.yeast.nuclear.pore.complex.proteins..J.Cell.Biol.119.4..705.23	0.0113102558097348	"3/3"	"3/54"	32	M
Literature	Nino.CA..et.al...2013..mRNA.nuclear.export.in.yeast..Chem.Rev.113.11..8523.45	0.0115234890922992	"9/70"	"9/54"	32	M
Literature	An.L..et.al...2016..Emergence.and.evolution.of.yeast.prion.and.prion.like.proteins..BMC.Evol.Biol.16...24	0.0129651802840402	"6/26"	"6/54"	32	M
Literature	Sharma.K..et.al...1996..Yeast.nucleoporin.mutants.are.defective.in.pre.tRNA.splicing..Mol.Cell.Biol.16.1..294.301	0.0138760330008905	"4/8"	"4/54"	32	M
Literature	Santangelo.GM..2006..Glucose.signaling.in.Saccharomyces.cerevisiae..Microbiol.Mol.Biol.Rev.70.1..253.82	0.0246445852794931	"8/59"	"8/54"	32	M
Literature	Subbotin.RI.and.Chait.BT..2014..A.pipeline.for.determining.protein.protein.interactions.and.proximities.in.the.cellular.milieu..Mol.Cell.Proteomics.13.11..2824.35	0.0299252221228675	"6/30"	"6/54"	32	M
Literature	Bucci.M.and.Wente.SR..1998..A.novel.fluorescence.based.genetic.strategy.identifies.mutants.of.Saccharomyces.cerevisiae.defective.for.nuclear.pore.complex.assembly..Mol.Biol.Cell.9.9..2439.61	0.0373932160092033	"4/10"	"4/54"	32	M
Literature	Hung.NJ..et.al...2008..Arx1.Is.a.Nuclear.Export.Receptor.for.the.60S.Ribosomal.Subunit.in.Yeast..Mol.Biol.Cell.19.2..735.44	0.0373932160092033	"4/10"	"4/54"	32	M
Literature	Oishi.K..et.al...2013..A.bipolar.functionality.of.Q.N.rich.proteins..Lsm4.amyloid.causes.clearance.of.yeast.prions..Microbiologyopen.2.3..415.30	0.0373932160092033	"4/10"	"4/54"	32	M
Literature	Fabre.E..et.al...1994..Nup145p.is.required.for.nuclear.export.of.mRNA.and.binds.homopolymeric.RNA.in.vitro.via.a.novel.conserved.motif..Cell.78.2..275.89	0.0382086305671117	"3/4"	"3/54"	32	M
Literature	Murphy.R..et.al...1996..GLE2..a.Saccharomyces.cerevisiae.homologue.of.the.Schizosaccharomyces.pombe.export.factor.RAE1..is.required.for.nuclear.pore.complex.structure.and.function..Mol.Biol.Cell.7.12..1921.37	0.0382086305671117	"3/4"	"3/54"	32	M
GO	sequence-specific DNA binding (GO.0043565)	2.22972223300317e-11	"18/125"	"18/39"	34	N
GO	DNA binding (GO.0003677)	1.58716400466474e-05	"19/320"	"19/39"	34	N
GO	zinc ion binding (GO.0008270)	2.5447877501693e-05	"11/93"	"11/39"	34	N
GO	regulation of transcription, DNA-templated (GO.0006355)	7.45540000150944e-05	"19/366"	"19/39"	34	N
GO	RNA polymerase II transcription factor activity, sequence-specific DNA binding (GO.0000981)	0.000620837362272406	"8/62"	"8/39"	34	N
GO	metal ion binding (GO.0046872)	0.000620837362272406	"17/343"	"17/39"	34	N
GO	RNA polymerase II repressing transcription factor binding (GO.0001103)	0.00439935621317151	"4/12"	"4/39"	34	N
GO	positive regulation of transcription from RNA polymerase II promoter (GO.0045944)	0.00506975305796846	"10/141"	"10/39"	34	N
GO	transcription, DNA-templated (GO.0006351)	0.0053574712074176	"16/368"	"16/39"	34	N
GO	RNA polymerase II regulatory region sequence-specific DNA binding (GO.0000977)	0.00747402297071522	"4/15"	"4/39"	34	N
GO	RNA polymerase II core promoter proximal region sequence-specific DNA binding (GO.0000978)	0.00747402297071522	"7/68"	"7/39"	34	N
GO	negative regulation of transcription from RNA polymerase II promoter (GO.0000122)	0.0130422018256824	"7/77"	"7/39"	34	N
GO	RNA polymerase II transcription factor activity, sequence-specific transcription regulatory region DNA binding (GO.0001133)	0.0130422018256824	"3/7"	"3/39"	34	N
GO	transcriptional repressor activity, RNA polymerase II transcription factor binding (GO.0001191)	0.0276668312295367	"3/9"	"3/39"	34	N
GO	nucleic acid binding (GO.0003676)	0.0446905512979671	"9/160"	"9/39"	34	N
Literature	Gordan.R..et.al...2011..Curated.collection.of.yeast.transcription.factor.DNA.binding.specificity.data.reveals.novel.structural.and.gene.regulatory.insights..Genome.Biol.12.12..R125	2.43574192600666e-11	"19/120"	"19/39"	34	N
Literature	Beskow.A.and.Wright.AP..2006..Comparative.analysis.of.regulatory.transcription.factors.in.Schizosaccharomyces.pombe.and.budding.yeasts..Yeast.23.13..929.35	1.59367072120935e-10	"20/159"	"20/39"	34	N
Literature	Zheng.J..et.al...2010..Epistatic.relationships.reveal.the.functional.organization.of.yeast.transcription.factors..Mol.Syst.Biol.6...420	8.57633675257824e-10	"22/230"	"22/39"	34	N
Literature	Yu.H.and.Gerstein.M..2006..Genomic.analysis.of.the.hierarchical.structure.of.regulatory.networks..Proc.Natl.Acad.Sci.U.S.A.103.40..14724.31	4.81602169116323e-07	"19/218"	"19/39"	34	N
Literature	Badis.G..et.al...2008..A.library.of.yeast.transcription.factor.motifs.reveals.a.widespread.function.for.Rsc3.in.targeting.nucleosome.exclusion.at.promoters..Mol.Cell.32.6..878.87	6.77058313711557e-06	"9/33"	"9/39"	34	N
Literature	Bussereau.F..et.al...2006..The.Kluyveromyces.lactis.repertoire.of.transcriptional.regulators..FEMS.Yeast.Res.6.3..325.35	2.50795273806098e-05	"12/89"	"12/39"	34	N
Literature	Jothi.R..et.al...2009..Genomic.analysis.reveals.a.tight.link.between.transcription.factor.dynamics.and.regulatory.network.architecture..Mol.Syst.Biol.5.294	2.50795273806098e-05	"13/110"	"13/39"	34	N
Literature	Kumar.L..et.al...2010..Systematic.discovery.of.regulatory.motifs.in.Fusarium.graminearum.by.comparing.four.Fusarium.genomes..BMC.Genomics.11...208	0.000208642505488955	"6/14"	"6/39"	34	N
Literature	Mak.HC..et.al...2009..Dynamic.reprogramming.of.transcription.factors.to.and.from.the.subtelomere..Genome.Res.19.6..1014.25	0.000305737046463921	"6/15"	"6/39"	34	N
Literature	Tsankov.AM..et.al...2010..The.role.of.nucleosome.positioning.in.the.evolution.of.gene.regulation..PLoS.Biol.8.7..e1000414	0.00183406877526893	"7/32"	"7/39"	34	N
Literature	Zhao.XQ.and.Bai.F..2012..Zinc.and.yeast.stress.tolerance..micronutrient.plays.a.big.role..J.Biotechnol.158.4..176.83	0.00183406877526893	"6/20"	"6/39"	34	N
Literature	Hanlon.SE..et.al...2011..The.Stress.Response.Factors.Yap6..Cin5..Phd1..and.Skn7.Direct.Targeting.of.the.Conserved.Co.Repressor.Tup1.Ssn6.in.S..cerevisiae..PLoS.One.6.4..e19060	0.00648130899170344	"5/14"	"5/39"	34	N
Literature	Morozov.AV.and.Siggia.ED..2007..Connecting.protein.structure.with.predictions.of.regulatory.sites..Proc.Natl.Acad.Sci.U.S.A.104.17..7068.73	0.00648130899170344	"8/56"	"8/39"	34	N
Literature	Buck.MJ.and.Lieb.JD..2006..A.chromatin.mediated.mechanism.for.specification.of.conditional.transcription.factor.targets..Nat.Genet.38.12..1446.51	0.0270678589147091	"11/145"	"11/39"	34	N
Literature	Rodriguez.Pena.JM..et.al...2010..The.high.osmolarity.glycerol..HOG..and.cell.wall.integrity..CWI..signalling.pathways.interplay..a.yeast.dialogue.between.MAPK.routes..Yeast.27.8..495.502	0.0275726051960747	"6/32"	"6/39"	34	N
Literature	Miller.C..et.al...2011..Dynamic.transcriptome.analysis.measures.rates.of.mRNA.synthesis.and.decay.in.yeast..Mol.Syst.Biol.7...458	0.0375319709445386	"6/34"	"6/39"	34	N
Literature	Dalal.CK..et.al...2014..Pulsatile.dynamics.in.the.yeast.proteome..Curr.Biol.24.18..2189.94	0.0400041147535112	"4/10"	"4/39"	34	N
GO	regulation of transcription, DNA-templated (GO.0006355)	1.5418567788937e-11	"53/366"	"53/130"	35	O
GO	transcription, DNA-templated (GO.0006351)	9.15767013120737e-10	"50/368"	"50/130"	35	O
GO	sequence-specific DNA binding (GO.0043565)	3.14577211212472e-07	"25/125"	"25/130"	35	O
GO	positive regulation of transcription from RNA polymerase II promoter (GO.0045944)	6.62064808928167e-07	"26/141"	"26/130"	35	O
GO	nuclear-transcribed mRNA catabolic process, deadenylation-dependent decay (GO.0000288)	4.09553681903128e-06	"8/12"	"8/130"	35	O
GO	actin cortical patch (GO.0030479)	1.73804987975033e-05	"13/43"	"13/130"	35	O
GO	RNA polymerase II activating transcription factor binding (GO.0001102)	3.3471651515357e-05	"8/15"	"8/130"	35	O
GO	nucleus (GO.0005634)	0.000213671325354922	"86/1190"	"86/130"	35	O
GO	mRNA binding (GO.0003729)	0.000320442035590816	"20/125"	"20/130"	35	O
GO	negative regulation of translation (GO.0017148)	0.000811695328540174	"7/16"	"7/130"	35	O
GO	P-body (GO.0000932)	0.00202265375977115	"10/40"	"10/130"	35	O
GO	endocytosis (GO.0006897)	0.00202265375977115	"14/77"	"14/130"	35	O
GO	CCR4-NOT core complex (GO.0030015)	0.00202265375977115	"5/8"	"5/130"	35	O
GO	DNA binding (GO.0003677)	0.0021819116219955	"33/320"	"33/130"	35	O
GO	cellular bud (GO.0005933)	0.00231065234016394	"11/50"	"11/130"	35	O
GO	protein serine/threonine kinase activity (GO.0004674)	0.00515707477602599	"16/107"	"16/130"	35	O
GO	cellular bud neck (GO.0005935)	0.00583792183326106	"20/157"	"20/130"	35	O
GO	transcription factor activity, sequence-specific DNA binding (GO.0003700)	0.0110148186994183	"10/50"	"10/130"	35	O
GO	transcription from RNA polymerase II promoter (GO.0006366)	0.0147529469702324	"14/95"	"14/130"	35	O
GO	positive regulation of Arp2/3 complex-mediated actin nucleation (GO.2000601)	0.0147529469702324	"4/7"	"4/130"	35	O
GO	transcriptional activator activity, RNA polymerase II core promoter proximal region sequence-specific binding (GO.0001077)	0.0157638828008099	"10/53"	"10/130"	35	O
GO	nucleic acid binding (GO.0003676)	0.0182623957254417	"19/160"	"19/130"	35	O
GO	actin cortical patch localization (GO.0051666)	0.0183127910628775	"5/13"	"5/130"	35	O
GO	RNA binding (GO.0003723)	0.0187630335954869	"22/202"	"22/130"	35	O
GO	actin cortical patch assembly (GO.0000147)	0.0241985240779434	"5/14"	"5/130"	35	O
GO	cytoplasm (GO.0005737)	0.0241985240779434	"70/1024"	"70/130"	35	O
GO	RNA polymerase II core promoter proximal region sequence-specific DNA binding (GO.0000978)	0.0243444817490626	"11/68"	"11/130"	35	O
GO	regulation of transcription from RNA polymerase II promoter (GO.0006357)	0.0267556874333504	"11/69"	"11/130"	35	O
GO	cytoplasmic stress granule (GO.0010494)	0.0292350272578585	"9/49"	"9/130"	35	O
GO	activation of protein kinase activity (GO.0032147)	0.0292350272578585	"5/15"	"5/130"	35	O
GO	regulation of apoptotic process (GO.0042981)	0.0292350272578585	"5/15"	"5/130"	35	O
GO	protein kinase activity (GO.0004672)	0.036028071055258	"14/108"	"14/130"	35	O
GO	cellular bud tip (GO.0005934)	0.0482062816019421	"11/76"	"11/130"	35	O
GO	sucrose catabolic process (GO.0005987)	0.0482062816019421	"3/5"	"3/130"	35	O
GO	actin filament organization (GO.0007015)	0.0482062816019421	"6/25"	"6/130"	35	O
GO	stress-activated protein kinase signaling cascade (GO.0031098)	0.0482062816019421	"5/17"	"5/130"	35	O
GO	cytoplasmic mRNA processing body assembly (GO.0033962)	0.0482062816019421	"3/5"	"3/130"	35	O
Literature	Alberti.S..et.al...2009..A.systematic.survey.identifies.prions.and.illuminates.sequence.features.of.prionogenic.proteins..Cell.137.1..146.58	2.35931145945162e-38	"49/91"	"49/130"	35	O
Literature	Wear.MP..et.al...2015..Proteins.with.Intrinsically.Disordered.Domains.Are.Preferentially.Recruited.to.Polyglutamine.Aggregates..PLoS.One.10.8..e0136362	1.53180031399635e-24	"30/47"	"30/130"	35	O
Literature	Harbi.D.and.Harrison.PM..2014..Interaction.networks.of.prion..prionogenic.and.prion.like.proteins.in.budding.yeast..and.their.role.in.gene.regulation..PLoS.One.9.6..e100615	1.35560316516499e-16	"24/44"	"24/130"	35	O
Literature	Yu.H.and.Gerstein.M..2006..Genomic.analysis.of.the.hierarchical.structure.of.regulatory.networks..Proc.Natl.Acad.Sci.U.S.A.103.40..14724.31	1.11544811334302e-11	"42/218"	"42/130"	35	O
Literature	Kayatekin.C..et.al...2014..Prion.like.proteins.sequester.and.suppress.the.toxicity.of.huntingtin.exon.1..Proc.Natl.Acad.Sci.U.S.A.111.33..12085.90	4.08511744070555e-10	"14/21"	"14/130"	35	O
Literature	Weinberg.J.and.Drubin.DG..2012..Clathrin.mediated.endocytosis.in.budding.yeast..Trends.Cell.Biol.22.1..1.13	9.02430536672626e-06	"14/37"	"14/130"	35	O
Literature	Beskow.A.and.Wright.AP..2006..Comparative.analysis.of.regulatory.transcription.factors.in.Schizosaccharomyces.pombe.and.budding.yeasts..Yeast.23.13..929.35	1.23432172274451e-05	"28/159"	"28/130"	35	O
Literature	Gordan.R..et.al...2011..Curated.collection.of.yeast.transcription.factor.DNA.binding.specificity.data.reveals.novel.structural.and.gene.regulatory.insights..Genome.Biol.12.12..R125	7.82586585964977e-05	"23/120"	"23/130"	35	O
Literature	Boettner.DR..et.al...2011..Lessons.from.yeast.for.clathrin.mediated.endocytosis..Nat.Cell.Biol.14.1..2.10	9.30239786920957e-05	"11/26"	"11/130"	35	O
Literature	Chi.RJ..et.al...2012..Role.of.Scd5..a.protein.phosphatase.1.targeting.protein..in.phosphoregulation.of.Sla1.during.endocytosis..J.Cell.Sci.125.Pt.20..4728.39	9.30239786920957e-05	"9/16"	"9/130"	35	O
Literature	Lu.R..et.al...2016..Clathrin.mediated.endocytosis.in.budding.yeast.at.a.glance..J.Cell.Sci.129.8..1531.6	9.30239786920957e-05	"11/26"	"11/130"	35	O
Literature	Robertson.AS..et.al...2009..Functions.of.actin.in.endocytosis..Cell.Mol.Life.Sci.66.13..2049.65	0.000162289583313986	"10/22"	"10/130"	35	O
Literature	Wang.P.and.Shen.G..2011..The.endocytic.adaptor.proteins.of.pathogenic.fungi..charting.new.and.familiar.pathways..Med.Mycol.49.5..449.57	0.000162289583313986	"10/22"	"10/130"	35	O
Literature	Jothi.R..et.al...2009..Genomic.analysis.reveals.a.tight.link.between.transcription.factor.dynamics.and.regulatory.network.architecture..Mol.Syst.Biol.5.294	0.000236407415953803	"21/110"	"21/130"	35	O
Literature	Weston.A.and.Sommerville.J..2006..Xp54.and.related..DDX6.like..RNA.helicases..roles.in.messenger.RNP.assembly..translation.regulation.and.RNA.degradation..Nucleic.Acids.Res.34.10..3082.94	0.000387471777537435	"8/14"	"8/130"	35	O
Literature	Baggett.JJ.and.Wendland.B..2001..Clathrin.function.in.yeast.endocytosis..Traffic.2.5..297.302	0.00039182049822312	"9/19"	"9/130"	35	O
Literature	Maldonado.Baez.L..et.al...2008..Interaction.between.Epsin.Yap180.Adaptors.and.the.Scaffolds.Ede1.Pan1.Is.Required.for.Endocytosis..Mol.Biol.Cell.19.7..2936.48	0.00039182049822312	"6/7"	"6/130"	35	O
Literature	Venters.BJ..et.al...2011..A.comprehensive.genomic.binding.map.of.gene.and.chromatin.regulatory.proteins.in.Saccharomyces..Mol.Cell.41.4..480.92	0.00039182049822312	"23/135"	"23/130"	35	O
Literature	Wendland.B..2002..Epsins..adaptors.in.endocytosis..Nat.Rev.Mol.Cell.Biol.3.12..971.7	0.00039182049822312	"6/7"	"6/130"	35	O
Literature	Keene.JD..2007..RNA.regulons..coordination.of.post.transcriptional.events..Nat.Rev.Genet.8.7..533.43	0.000596782029828552	"8/15"	"8/130"	35	O
Literature	An.L..et.al...2016..Emergence.and.evolution.of.yeast.prion.and.prion.like.proteins..BMC.Evol.Biol.16...24	0.000663579493936755	"10/26"	"10/130"	35	O
Literature	Chua.G..et.al...2006..Identifying.transcription.factor.functions.and.targets.by.phenotypic.activation..Proc.Natl.Acad.Sci.U.S.A.103.32..12045.50	0.000663579493936755	"12/39"	"12/130"	35	O
Literature	Braun.KA.and.Young.ET..2014..Coupling.mRNA.synthesis.and.decay..Mol.Cell.Biol.34.22..4078.87	0.000808837405154106	"12/40"	"12/130"	35	O
Literature	Young.ET..et.al...2000..Trinucleotide.repeats.are.clustered.in.regulatory.genes.in.Saccharomyces.cerevisiae..Genetics.154.3..1053.68	0.000808837405154106	"11/33"	"11/130"	35	O
Literature	Dupre.S..et.al...2004..Ubiquitin.and.endocytic.internalization.in.yeast.and.animal.cells..Biochim.Biophys.Acta.1695.1.3..89.111	0.000822710879186583	"10/27"	"10/130"	35	O
Literature	Munn.AL..2000..The.yeast.endocytic.membrane.transport.system..Microsc.Res.Tech.51.6..547.62	0.000822710879186583	"10/27"	"10/130"	35	O
Literature	Wei.W..et.al...2016..The.Kinome.of.Edible.and.Medicinal.Fungus.Wolfiporia.cocos..Front.Microbiol.7...1495	0.000822710879186583	"10/27"	"10/130"	35	O
Literature	Alexandrov.AI.and.Ter.Avanesyan.MD..2013..Could.yeast.prion.domains.originate.from.polyQ.N.tracts..Prion.7.3..209.14	0.0012101489190202	"7/12"	"7/130"	35	O
Literature	Hogan.DJ..et.al...2008..Diverse.RNA.binding.proteins.interact.with.functionally.related.sets.of.RNAs..suggesting.an.extensive.regulatory.system..PLoS.Biol.6.10..e255	0.00131593461653332	"13/50"	"13/130"	35	O
Literature	Ryan.O..et.al...2012..Global.gene.deletion.analysis.exploring.yeast.filamentous.growth..Science.337.6100..1353.6	0.00234611052881257	"7/13"	"7/130"	35	O
Literature	Chen.J..et.al...2001..Purification.and.characterization.of.the.1.0.MDa.CCR4.NOT.complex.identifies.two.novel.components.of.the.complex..J.Mol.Biol.314.4..683.94	0.00241740311457429	"6/9"	"6/130"	35	O
Literature	Collart.MA..et.al...2013..The.Not3.5.subunit.of.the.Ccr4.Not.complex..a.central.regulator.of.gene.expression.that.integrates.signals.between.the.cytoplasm.and.the.nucleus.in.eukaryotic.cells..Cell.Signal.25.4..743.51	0.00241740311457429	"6/9"	"6/130"	35	O
Literature	Dutta.A..et.al...2015..Ccr4.Not.and.TFIIS.Function.Cooperatively.To.Rescue.Arrested.RNA.Polymerase.II..Mol.Cell.Biol.35.11..1915.25	0.00241740311457429	"6/9"	"6/130"	35	O
Literature	Miller.JE.and.Reese.JC..2012..Ccr4.Not.complex..the.control.freak.of.eukaryotic.cells..Crit.Rev.Biochem.Mol.Biol.47.4..315.33	0.00241740311457429	"6/9"	"6/130"	35	O
Literature	Hart.CE..et.al...2006..Connectivity.in.the.yeast.cell.cycle.transcription.network..inferences.from.neural.networks..PLoS.Comput.Biol.2.12..e169	0.0027201146448421	"11/38"	"11/130"	35	O
Literature	Luscombe.NM..et.al...2004..Genomic.analysis.of.regulatory.network.dynamics.reveals.large.topological.changes..Nature.431.7006..308.12	0.00290227515415537	"12/46"	"12/130"	35	O
Literature	Boeke.D..et.al...2014..Quantification.of.cytosolic.interactions.identifies.Ede1.oligomers.as.key.organizers.of.endocytosis..Mol.Syst.Biol.10.11..756	0.00346037320681263	"7/14"	"7/130"	35	O
Literature	Cridge.AG..et.al...2010..Identifying.eIF4E.binding.protein.translationally.controlled.transcripts.reveals.links.to.mRNAs.bound.by.specific.PUF.proteins..Nucleic.Acids.Res.38.22..8039.50	0.00346037320681263	"5/6"	"5/130"	35	O
Literature	Preissler.S..et.al...2015..Not4.dependent.translational.repression.is.important.for.cellular.protein.homeostasis.in.yeast..EMBO.J.34.14..1905.24	0.00346037320681263	"5/6"	"5/130"	35	O
Literature	Frey.AG.and.Eide.DJ..2012..Zinc.responsive.coactivator.recruitment.by.the.yeast.Zap1.transcription.factor..Microbiologyopen.1.2..105.14	0.00429174215218071	"12/48"	"12/130"	35	O
Literature	Mayhew.D.and.Mitra.RD..2014..Transcription.factor.regulation.and.chromosome.dynamics.during.pseudohyphal.growth..Mol.Biol.Cell.25.17..2669.76	0.00431907786149763	"9/26"	"9/130"	35	O
Literature	Balagopal.V..et.al...2012..Ways.and.means.of.eukaryotic.mRNA.decay..Biochim.Biophys.Acta.1819.6..593.603	0.00439307014496907	"8/20"	"8/130"	35	O
Literature	Moosavi.B..et.al...2016..Actin..Membrane.Trafficking.and.the.Control.of.Prion.Induction..Propagation.and.Transmission.in.Yeast..Traffic.17.1..5.20	0.00439307014496907	"8/20"	"8/130"	35	O
Literature	Duennwald.ML..et.al...2006..A.network.of.protein.interactions.determines.polyglutamine.toxicity..Proc.Natl.Acad.Sci.U.S.A.103.29..11051.6	0.00447954659043248	"6/10"	"6/130"	35	O
Literature	Babbitt.GA..2010..Relaxed.selection.against.accidental.binding.of.transcription.factors.with.conserved.chromatin.contexts..Gene.466.1.2..43.8	0.0049436328216411	"15/76"	"15/130"	35	O
Literature	Riordan.DP..et.al...2011..Identification.of.RNA.recognition.elements.in.the.Saccharomyces.cerevisiae.transcriptome..Nucleic.Acids.Res.39.4..1501.9	0.00516161926013137	"7/15"	"7/130"	35	O
Literature	Weinberg.JS.and.Drubin.DG..2014..Regulation.of.clathrin.mediated.endocytosis.by.dynamic.ubiquitination.and.deubiquitination..Curr.Biol.24.9..951.9	0.00516161926013137	"7/15"	"7/130"	35	O
Literature	Zheng.J..et.al...2010..Epistatic.relationships.reveal.the.functional.organization.of.yeast.transcription.factors..Mol.Syst.Biol.6...420	0.00678935305472674	"28/230"	"28/130"	35	O
Literature	Goode.BL..et.al...2015..Actin.and.endocytosis.in.budding.yeast..Genetics.199.2..315.58	0.00701788201105621	"12/51"	"12/130"	35	O
Literature	Boyce.KJ.and.Andrianopoulos.A..2011..Ste20.related.kinases..effectors.of.signaling.and.morphogenesis.in.fungi..Trends.Microbiol.19.8..400.10	0.00718792939618165	"9/28"	"9/130"	35	O
Literature	Dores.MR..et.al...2010..The.function.of.yeast.epsin.and.Ede1.ubiquitin.binding.domains.during.receptor.internalization..Traffic.11.1..151.60	0.00783981163325187	"5/7"	"5/130"	35	O
Literature	Goldstrohm.AC..et.al...2006..PUF.proteins.bind.Pop2p.to.regulate.messenger.RNAs..Nat.Struct.Mol.Biol.13.6..533.9	0.00783981163325187	"7/16"	"7/130"	35	O
Literature	Haimovich.G..et.al...2013..The.fate.of.the.messenger.is.pre.determined..a.new.model.for.regulation.of.gene.expression..Biochim.Biophys.Acta.1829.6.7..643.53	0.00783981163325187	"8/22"	"8/130"	35	O
Literature	Panasenko.O..et.al...2006..The.yeast.Ccr4.Not.complex.controls.ubiquitination.of.the.nascent.associated.polypeptide..NAC.EGD..complex..J.Biol.Chem.281.42..31389.98	0.00783981163325187	"5/7"	"5/130"	35	O
Literature	Suzuki.R..et.al...2012..Regulation.of.clathrin.coat.assembly.by.Eps15.homology.domain.mediated.interactions.during.endocytosis..Mol.Biol.Cell.23.4..687.700	0.00783981163325187	"6/11"	"6/130"	35	O
Literature	Toshima.JY..et.al...2009..Requirements.for.recruitment.of.a.G.protein.coupled.receptor.to.clathrin.coated.pits.in.budding.yeast..Mol.Biol.Cell.20.24..5039.50	0.00783981163325187	"5/7"	"5/130"	35	O
Literature	Wu.WS.and.Li.WH..2008..Systematic.identification.of.yeast.cell.cycle.transcription.factors.using.multiple.data.sources..BMC.Bioinformatics.9.522	0.00783981163325187	"7/16"	"7/130"	35	O
Literature	Aguilar.RC..et.al...2003..The.yeast.Epsin.Ent1.is.recruited.to.membranes.through.multiple.independent.interactions..J.Biol.Chem.278.12..10737.43	0.00808793624088373	"4/4"	"4/130"	35	O
Literature	Maillet.L.and.Collart.MA..2002..Interaction.between.Not1p..a.component.of.the.Ccr4.not.complex..a.global.regulator.of.transcription..and.Dhh1p..a.putative.RNA.helicase..J.Biol.Chem.277.4..2835.42	0.00808793624088373	"4/4"	"4/130"	35	O
Literature	Parker.R..2012..RNA.Degradation.in.Saccharomyces.cerevisae..Genetics.191.3..671.702	0.0108855270270959	"12/54"	"12/130"	35	O
Literature	Reijns.MA..et.al...2008..A.role.for.Q.N.rich.aggregation.prone.regions.in.P.body.localization..J.Cell.Sci.121.Pt.15..2463.72	0.0110482222868033	"7/17"	"7/130"	35	O
Literature	D.Hondt.K..et.al...2000..Protein.and.lipid.requirements.for.endocytosis..Annu.Rev.Genet.34...255.295	0.0125302356930536	"10/38"	"10/130"	35	O
Literature	Ballester.Tomas.L..et.al...2017..Inappropriate.translation.inhibition.and.P.body.formation.cause.cold.sensitivity.in.tryptophan.auxotroph.yeast.mutants..Biochim.Biophys.Acta.1864.2..314.323	0.0154600938645593	"5/8"	"5/130"	35	O
Literature	Chiang.YC..et.al...1996..ADR1.activation.domains.contact.the.histone.acetyltransferase.GCN5.and.the.core.transcriptional.factor.TFIIB..J.Biol.Chem.271.50..32359.65	0.0154600938645593	"5/8"	"5/130"	35	O
Literature	Collart.MA..2003..Global.control.of.gene.expression.in.yeast.by.the.Ccr4.Not.complex..Gene.313.1.16	0.0154600938645593	"5/8"	"5/130"	35	O
Literature	Collart.MA..2013..The.Not4.RING.E3.Ligase..A.Relevant.Player.in.Cotranslational.Quality.Control..ISRN.Mol.Biol.2013...548359	0.0154600938645593	"5/8"	"5/130"	35	O
Literature	Collart.MA.and.Panasenko.OO..2012..The.Ccr4..not.complex..Gene.492.1..42.53	0.0154600938645593	"5/8"	"5/130"	35	O
Literature	Duncan.MC..et.al...2001..Yeast.Eps15.like.endocytic.protein..Pan1p..activates.the.Arp2.3.complex..Nat.Cell.Biol.3.7..687.90	0.0154600938645593	"5/8"	"5/130"	35	O
Literature	Handfield.LF..et.al...2013..Unsupervised.Clustering.of.Subcellular.Protein.Expression.Patterns.in.High.Throughput.Microscopy.Images.Reveals.Protein.Complexes.and.Functional.Relationships.between.Proteins..PLoS.Comput.Biol.9.6..e1003085	0.0154600938645593	"15/86"	"15/130"	35	O
Literature	Kawai.S..et.al...2004..Molecular.insights.on.DNA.delivery.into.Saccharomyces.cerevisiae..Biochem.Biophys.Res.Commun.317.1..100.7	0.0154600938645593	"5/8"	"5/130"	35	O
Literature	Nasertorabi.F..et.al...2011..Insights.into.the.structure.of.the.CCR4.NOT.complex.by.electron.microscopy..FEBS.Lett.585.14..2182.6	0.0154600938645593	"5/8"	"5/130"	35	O
Literature	Ohn.T..et.al...2007..CAF1.plays.an.important.role.in.mRNA.deadenylation.separate.from.its.contact.to.CCR4..Nucleic.Acids.Res.35.9..3002.15	0.0154600938645593	"5/8"	"5/130"	35	O
Literature	Panepinto.JC..et.al...2013..The.cellular.roles.of.Ccr4.NOT.in.model.and.pathogenic.fungi.implications.for.fungal.virulence..Front.Genet.4...302	0.0154600938645593	"5/8"	"5/130"	35	O
Literature	van.Dyk.D..et.al...2005..Mss11p.is.a.central.element.of.the.regulatory.network.that.controls.FLO11.expression.and.invasive.growth.in.Saccharomyces.cerevisiae..Genetics.169.1..91.106	0.0154600938645593	"5/8"	"5/130"	35	O
Literature	Mulder.KW..et.al...2007..Modulation.of.Ubc4p.Ubc5p.Mediated.Stress.Responses.by.the.RING.Finger.Dependent.Ubiquitin.Protein.Ligase.Not4p.in.Saccharomyces.cerevisiae..Genetics.176.1..181.92	0.0164054261782347	"9/32"	"9/130"	35	O
Literature	Biddick.R.and.Young.ET..2009..The.disorderly.study.of.ordered.recruitment..Yeast.26.4..205.20	0.0166970729386598	"15/87"	"15/130"	35	O
Literature	Narlikar.GJ..et.al...2002..Cooperation.between.complexes.that.regulate.chromatin.structure.and.transcription..Cell.108.4..475.87	0.0166970729386598	"10/40"	"10/130"	35	O
Literature	Badarinarayana.V..et.al...2000..Functional.interaction.of.CCR4.NOT.proteins.with.TATAA.binding.protein..TBP..and.its.associated.factors.in.yeast..Genetics.155.3..1045.54	0.0179961103404039	"6/13"	"6/130"	35	O
Literature	Sertil.O..et.al...2007..Direct.role.for.the.Rpd3.complex.in.transcriptional.induction.of.the.anaerobic.DAN.TIR.genes.in.yeast..Mol.Cell.Biol.27.6..2037.47	0.0179961103404039	"6/13"	"6/130"	35	O
Literature	Gallego.O..et.al...2010..A.systematic.screen.for.protein.lipid.interactions.in.Saccharomyces.cerevisiae..Mol.Syst.Biol.6...430	0.0183739040147246	"18/121"	"18/130"	35	O
Literature	Ghosh.Dastidar.R..et.al...2012..The.nuclear.localization.of.SWI.SNF.proteins.is.subjected.to.oxygen.regulation..Cell.Biosci.2.1..30	0.0193063321113965	"14/78"	"14/130"	35	O
Literature	Bussereau.F..et.al...2006..The.Kluyveromyces.lactis.repertoire.of.transcriptional.regulators..FEMS.Yeast.Res.6.3..325.35	0.0208607322062379	"15/89"	"15/130"	35	O
Literature	Mok.J..et.al...2010..Deciphering.protein.kinase.specificity.through.large.scale.analysis.of.yeast.phosphorylation.site.motifs..Sci.Signal.3.109..ra12	0.0212724898417097	"11/50"	"11/130"	35	O
Literature	Workman.CT..et.al...2006..A.systems.approach.to.mapping.DNA.damage.response.pathways..Science.312.5776..1054.9	0.0216178673530772	"8/26"	"8/130"	35	O
Literature	Baggett.JJ..et.al...2003..The.Sla2p.talin.domain.plays.a.role.in.endocytosis.in.Saccharomyces.cerevisiae..Genetics.165.4..1661.74	0.0231674967395272	"4/5"	"4/130"	35	O
Literature	Borneman.AR..et.al...2006..Target.hub.proteins.serve.as.master.regulators.of.development.in.yeast..Genes.Dev.20.4..435.48	0.0231674967395272	"4/5"	"4/130"	35	O
Literature	Chernova.TA..et.al...2011..Prion.induction.by.the.short.lived..stress.induced.protein.lsb2.is.regulated.by.ubiquitination.and.association.with.the.actin.cytoskeleton..Mol.Cell.43.2..242.52	0.0231674967395272	"4/5"	"4/130"	35	O
Literature	D.Agostino.JL.and.Goode.BL..2005..Dissection.of.Arp2.3.complex.actin.nucleation.mechanism.and.distinct.roles.for.its.nucleation.promoting.factors.in.Saccharomyces.cerevisiae..Genetics.171.1..35.47	0.0231674967395272	"4/5"	"4/130"	35	O
Literature	Galletta.BJ..et.al...2012..Molecular.analysis.of.Arp2.3.complex.activation.in.cells..Biophys.J.103.10..2145.56	0.0231674967395272	"4/5"	"4/130"	35	O
Literature	Gerber.AP..et.al...2004..Extensive.association.of.functionally.and.cytotopically.related.mRNAs.with.Puf.family.RNA.binding.proteins.in.yeast..PLoS.Biol.2.3..E79	0.0231674967395272	"4/5"	"4/130"	35	O
Literature	Girao.H..et.al...2008..Actin.in.the.endocytic.pathway..From.yeast.to.mammals..FEBS.Lett.582.14..2112.9	0.0231674967395272	"4/5"	"4/130"	35	O
Literature	Krishnamurthy.M..et.al...2011..Caught.in.the.act..covalent.cross.linking.captures.activator.coactivator.interactions.in.vivo..ACS.Chem.Biol.6.12..1321.6	0.0231674967395272	"4/5"	"4/130"	35	O
Literature	Lo.TL..et.al...2012..The.mRNA.decay.pathway.regulates.the.expression.of.the.Flo11.adhesin.and.biofilm.formation.in.Saccharomyces.cerevisiae..Genetics.191.4..1387.91	0.0231674967395272	"4/5"	"4/130"	35	O
Literature	Olivas.W.and.Parker.R..2000..The.Puf3.protein.is.a.transcript.specific.regulator.of.mRNA.degradation.in.yeast..EMBO.J.19.23..6602.11	0.0231674967395272	"4/5"	"4/130"	35	O
Literature	Palumbo.MC..et.al...2008..Collective.behavior.in.gene.regulation..Post.transcriptional.regulation.and.the.temporal.compartmentalization.of.cellular.cycles..FEBS.J.275.10..2364.71	0.0231674967395272	"4/5"	"4/130"	35	O
Literature	Tadauchi.T..et.al...2001..Post.transcriptional.regulation.through.the.HO.3..UTR.by.Mpt5..a.yeast.homolog.of.Pumilio.and.FBF..EMBO.J.20.3..552.61	0.0231674967395272	"4/5"	"4/130"	35	O
Literature	Ulbricht.RJ.and.Olivas.WM..2008..Puf1p.acts.in.combination.with.other.yeast.Puf.proteins.to.control.mRNA.stability..RNA.14.2..246.62	0.0231674967395272	"4/5"	"4/130"	35	O
Literature	Wang.X..et.al...2016..Actin.Regulator.Feedback.Interactions.during.Endocytosis..Biophys.J.110.6..1430.43	0.0231674967395272	"4/5"	"4/130"	35	O
Literature	Yosefzon.Y..et.al...2011..Divergent.RNA.binding.specificity.of.yeast.Puf2p..RNA.17.8..1479.88	0.0231674967395272	"4/5"	"4/130"	35	O
Literature	Babbarwal.V..et.al...2014..The.Rpb4.7.module.of.RNA.polymerase.II.is.required.for.carbon.catabolite.repressor.protein.4.negative.on.TATA..Ccr4.not..complex.to.promote.elongation..J.Biol.Chem.289.48..33125.30	0.0234847402050671	"5/9"	"5/130"	35	O
Literature	Galletta.BJ.and.Cooper.JA..2009..Actin.and.endocytosis..mechanisms.and.phylogeny..Curr.Opin.Cell.Biol.21.1..20.7	0.0234847402050671	"5/9"	"5/130"	35	O
Literature	Lanza.AM..et.al...2012..Linking.yeast.Gcn5p.catalytic.function.and.gene.regulation.using.a.quantitative..graded.dominant.mutant.approach..PLoS.One.7.4..e36193	0.0234847402050671	"7/20"	"7/130"	35	O
Literature	Lemieux.K.and.Gaudreau.L..2004..Targeting.of.Swi.Snf.to.the.yeast.GAL1.UAS.G.requires.the.Mediator..TAF.IIs..and.RNA.polymerase.II..EMBO.J.23.20..4040.50	0.0234847402050671	"5/9"	"5/130"	35	O
Literature	Sun.Y..et.al...2015..A.Pan1.End3.Sla1.complex.links.Arp2.3.mediated.actin.assembly.to.sites.of.clathrin.mediated.endocytosis..Mol.Biol.Cell.26.21..3841.56	0.0234847402050671	"6/14"	"6/130"	35	O
Literature	Sylvain.MA..et.al...2011..Yeast.zinc.cluster.proteins.Dal81.and.Uga3.cooperate.by.targeting.common.coactivators.for.transcriptional.activation.of...aminobutyrate.responsive.genes..Genetics.188.3..523.34	0.0234847402050671	"5/9"	"5/130"	35	O
Literature	Vizoso.Vazquez.A..et.al...2012..Ixr1p.and.the.control.of.the.Saccharomyces.cerevisiae.hypoxic.response..Appl.Microbiol.Biotechnol.94.1..173.84	0.0234847402050671	"17/114"	"17/130"	35	O
Literature	Niederacher.G..et.al...2011..Interplay.of.dynamic.transcription.and.chromatin.remodeling..lessons.from.yeast..Int.J.Mol.Sci.12.8..4758.69	0.02377166074102	"10/43"	"10/130"	35	O
Literature	Ansari.SA.and.Morse.RH..2012..Selective.role.of.Mediator.tail.module.in.the.transcription.of.highly.regulated.genes.in.yeast..Transcription.3.3..110.4	0.025002112355838	"9/35"	"9/130"	35	O
Literature	Chandy.M..et.al...2006..SWI.SNF.displaces.SAGA.acetylated.nucleosomes..Eukaryot.Cell.5.10..1738.47	0.025002112355838	"9/35"	"9/130"	35	O
Literature	Mittal.N..et.al...2011..Interplay.between.posttranscriptional.and.posttranslational.interactions.of.RNA.binding.proteins..J.Mol.Biol.409.3..466.79	0.0316540366039909	"9/36"	"9/130"	35	O
Literature	Newpher.TM..et.al...2005..In.vivo.dynamics.of.clathrin.and.its.adaptor.dependent.recruitment.to.the.actin.based.endocytic.machinery.in.yeast..Dev.Cell.9.1..87.98	0.0340730341692129	"6/15"	"6/130"	35	O
Literature	Smythe.E.and.Ayscough.KR..2006..Actin.regulation.in.endocytosis..J.Cell.Sci.119.Pt.22..4589.98	0.0340730341692129	"6/15"	"6/130"	35	O
Literature	Goh.WS..et.al...2010..Blurring.of.high.resolution.data.shows.that.the.effect.of.intrinsic.nucleosome.occupancy.on.transcription.factor.binding.is.mostly.regional..not.local..PLoS.Comput.Biol.6.1..e1000649	0.0383399193982815	"9/37"	"9/130"	35	O
Literature	Nishtala.S..et.al...2016..Dissecting.the.expression.relationships.between.RNA.binding.proteins.and.their.cognate.targets.in.eukaryotic.post.transcriptional.regulatory.networks..Sci.Rep.6...25711	0.0383399193982815	"9/37"	"9/130"	35	O
Literature	Sanz.AB..et.al...2016..Cooperation.between.SAGA.and.SWI.SNF.complexes.is.required.for.efficient.transcriptional.responses.regulated.by.the.yeast.MAPK.Slt2..Nucleic.Acids.Res.44.15..7159.72	0.0383399193982815	"8/29"	"8/130"	35	O
Literature	Furukawa.K..et.al...2009..Expression.of.the.yeast.aquaporin.Aqy2.affects.cell.surface.properties.under.the.control.of.osmoregulatory.and.morphogenic.signalling.pathways..Mol.Microbiol.74.5..1272.1286	0.0388986224768884	"5/10"	"5/130"	35	O
Literature	Laribee.RN..et.al...2015..Ccr4.not.regulates.RNA.polymerase.I.transcription.and.couples.nutrient.signaling.to.the.control.of.ribosomal.RNA.biogenesis..PLoS.Genet.11.3..e1005113	0.0388986224768884	"5/10"	"5/130"	35	O
Literature	Lau.NC..et.al...2010..Phosphorylation.of.Not4p.functions.parallel.to.BUR2.to.regulate.resistance.to.cellular.stresses.in.Saccharomyces.cerevisiae..PLoS.One.5.4..e9864	0.0388986224768884	"5/10"	"5/130"	35	O
Literature	Liu.G..et.al...2016..Genome.Wide.Mapping.of.Binding.Sites.Reveals.Multiple.Biological.Functions.of.the.Transcription.Factor.Cst6p.in.Saccharomyces.cerevisiae..MBio.7.3.	0.0388986224768884	"5/10"	"5/130"	35	O
Literature	Roberts.SM.and.Winston.F..1997..Essential.functional.interactions.of.SAGA..a.Saccharomyces.cerevisiae.complex.of.Spt..Ada..and.Gcn5.proteins..with.the.Snf.Swi.and.Srb.mediator.complexes..Genetics.147.2..451.65	0.0388986224768884	"5/10"	"5/130"	35	O
Literature	Sun.Y..et.al...2006..Endocytic.internalization.in.budding.yeast.requires.coordinated.actin.nucleation.and.myosin.motor.activity..Dev.Cell.11.1..33.46	0.0388986224768884	"5/10"	"5/130"	35	O
Literature	Wiederhold.K.and.Passmore.LA..2010..Cytoplasmic.deadenylation..regulation.of.mRNA.fate..Biochem.Soc.Trans.38.6..1531.6	0.0388986224768884	"5/10"	"5/130"	35	O
Literature	Cardona.F..et.al...2012..Phylogenetic.origin.and.transcriptional.regulation.at.the.post.diauxic.phase.of.SPI1..in.Saccharomyces.cerevisiae..Cell.Mol.Biol.Lett.17.3..393.407	0.0389352384653775	"7/22"	"7/130"	35	O
Literature	Pruyne.D.and.Bretscher.A..2000..Polarization.of.cell.growth.in.yeast..J.Cell.Sci.113...Pt.4..571.85	0.0451399108245233	"12/66"	"12/130"	35	O
Literature	Idrissi.FZ..et.al...2012..Ultrastructural.dynamics.of.proteins.involved.in.endocytic.budding..Proc.Natl.Acad.Sci.U.S.A.109.39..E2587.94	0.0468623562411123	"6/16"	"6/130"	35	O
Literature	Albert.TK..et.al...2000..Isolation.and.characterization.of.human.orthologs.of.yeast.CCR4.NOT.complex.subunits..Nucleic.Acids.Res.28.3..809.17	0.0472482681371767	"4/6"	"4/130"	35	O
Literature	Ali.M..et.al...2014..Stress.dependent.Proteolytic.Processing.of.the.Actin.Assembly.Protein.Lsb1.Modulates.a.Yeast.Prion..J.Biol.Chem.289.40..27625.39	0.0472482681371767	"4/6"	"4/130"	35	O
Literature	Ansari.SA..et.al...2014..Mediator..TATA.binding.Protein..and.RNA.Polymerase.II.Contribute.to.Low.Histone.Occupancy.at.Active.Gene.Promoters.in.Yeast..J.Biol.Chem.289.21..14981.14995	0.0472482681371767	"4/6"	"4/130"	35	O
Literature	Bai.Y..et.al...1999..The.CCR4.and.CAF1.proteins.of.the.CCR4.NOT.complex.are.physically.and.functionally.separated.from.NOT2..NOT4..and.NOT5..Mol.Cell.Biol.19.10..6642.51	0.0472482681371767	"4/6"	"4/130"	35	O
Literature	Barker.SL..et.al...2007..Interaction.of.the.endocytic.scaffold.protein.Pan1.with.the.type.I.myosins.contributes.to.the.late.stages.of.endocytosis..Mol.Biol.Cell.18.8..2893.903	0.0472482681371767	"4/6"	"4/130"	35	O
Literature	Hines.JK.and.Craig.EA..2011..The.sensitive..SWI......prion..new.perspectives.on.yeast.prion.diversity..Prion.5.3..164.8	0.0472482681371767	"4/6"	"4/130"	35	O
Literature	Hogan.GJ..et.al...2015..Evolutionary.Conservation.and.Diversification.of.Puf.RNA.Binding.Proteins.and.Their.mRNA.Targets..PLoS.Biol.13.11..e1002307	0.0472482681371767	"4/6"	"4/130"	35	O
Literature	Maillet.L..et.al...2000..The.essential.function.of.Not1.lies.within.the.Ccr4.Not.complex..J.Mol.Biol.303.2..131.43	0.0472482681371767	"4/6"	"4/130"	35	O
Literature	Mauxion.F..et.al...2013..C2ORF29.CNOT11.and.CNOT10.form.a.new.module.of.the.CCR4.NOT.complex..RNA.Biol.10.2..267.76	0.0472482681371767	"4/6"	"4/130"	35	O
Literature	Montanes.FM..et.al...2011..Repression.of.ergosterol.biosynthesis.is.essential.for.stress.resistance.and.is.mediated.by.the.Hog1.MAP.kinase.and.the.Mot3.and.Rox1.transcription.factors..Mol.Microbiol.79.4..1008.23	0.0472482681371767	"4/6"	"4/130"	35	O
Literature	Norbeck.J..2008..Carbon.source.dependent.dynamics.of.the.Ccr4.Not.complex.in.Saccharomyces.cerevisiae..J.Microbiol.46.6..692.6	0.0472482681371767	"4/6"	"4/130"	35	O
Literature	Quenault.T..et.al...2011..PUF.proteins..repression..activation.and.mRNA.localization..Trends.Cell.Biol.21.2..104.12	0.0472482681371767	"4/6"	"4/130"	35	O
Literature	Sugiyama.S.and.Tanaka.M..2014..Self.propagating.amyloid.as.a.critical.regulator.for.diverse.cellular.functions..J.Biochem.155.6..345.51	0.0472482681371767	"4/6"	"4/130"	35	O
Literature	Wang.H..et.al...1994..Genetic.interactions.between.SIN3.mutations.and.the.Saccharomyces.cerevisiae.transcriptional.activators.encoded.by.MCM1..STE12..and.SWI1..Mol.Gen.Genet.245.6..675.85	0.0472482681371767	"4/6"	"4/130"	35	O
Literature	Ward.MP.and.Garrett.S..1994..Suppression.of.a.yeast.cyclic.AMP.dependent.protein.kinase.defect.by.overexpression.of.SOK1..a.yeast.gene.exhibiting.sequence.similarity.to.a.developmentally.regulated.mouse.gene..Mol.Cell.Biol.14.9..5619.27	0.0472482681371767	"4/6"	"4/130"	35	O
Literature	Boettner.DR..et.al...2011..Clathrin.light.chain.directs.endocytosis.by.influencing.the.binding.of.the.yeast.Hip1R.homologue..Sla2..to.F.actin..Mol.Biol.Cell.22.19..3699.714	0.0489144815671838	"9/39"	"9/130"	35	O
Phenotype	endocytosis..decreased	0.00160005395606808	"26/204"	"26/130"	35	O
Phenotype	invasive.growth..increased	0.00160005395606808	"37/359"	"37/130"	35	O
Phenotype	cell.shape..abnormal	0.012885365052102	"15/97"	"15/130"	35	O
Phenotype	colony.appearance..abnormal	0.0145184301897322	"18/136"	"18/130"	35	O
Phenotype	silencing..abnormal	0.0200748309818648	"9/42"	"9/130"	35	O
Phenotype	ionic.stress.resistance..decreased	0.0231210575921341	"13/85"	"13/130"	35	O
Phenotype	cell.size..increased	0.0276573951142754	"21/190"	"21/130"	35	O
Phenotype	RNA.accumulation..decreased	0.0276573951142754	"21/191"	"21/130"	35	O
Phenotype	cell.cycle.progression.in.G1.phase..delayed	0.0431604258409951	"8/40"	"8/130"	35	O
GO	intracellular signal transduction (GO.0035556)	1.23031423081871e-08	"19/58"	"19/129"	36	P
GO	protein kinase activity (GO.0004672)	2.35015193054456e-06	"22/108"	"22/129"	36	P
GO	protein serine/threonine kinase activity (GO.0004674)	2.35015193054456e-06	"22/107"	"22/129"	36	P
GO	kinase activity (GO.0016301)	3.04057864170812e-06	"24/131"	"24/129"	36	P
GO	phosphorylation (GO.0016310)	3.34134824048913e-06	"24/133"	"24/129"	36	P
GO	protein phosphorylation (GO.0006468)	3.42793888927288e-06	"22/114"	"22/129"	36	P
GO	cytoplasm (GO.0005737)	1.63850299399636e-05	"80/1024"	"80/129"	36	P
GO	cellular_component (GO.0005575)	7.14347491912323e-05	"18/94"	"18/129"	36	P
GO	ubiquitin-dependent endocytosis (GO.0070086)	0.000410626692478243	"6/10"	"6/129"	36	P
GO	cellular bud neck (GO.0005935)	0.000730536648545444	"22/157"	"22/129"	36	P
GO	signal transduction (GO.0007165)	0.00292572752655673	"11/50"	"11/129"	36	P
GO	ubiquitin protein ligase binding (GO.0031625)	0.00917152366205236	"6/16"	"6/129"	36	P
GO	cell cortex (GO.0005938)	0.0134077381161204	"8/32"	"8/129"	36	P
GO	cofactor binding (GO.0048037)	0.0134077381161204	"3/3"	"3/129"	36	P
GO	establishment of cell polarity (GO.0030010)	0.015666716477877	"6/18"	"6/129"	36	P
GO	sterol transporter activity (GO.0015248)	0.017662201799675	"4/7"	"4/129"	36	P
GO	positive regulation of GTPase activity (GO.0043547)	0.0179520631461129	"11/63"	"11/129"	36	P
GO	septin ring organization (GO.0031106)	0.02860918691208	"4/8"	"4/129"	36	P
GO	regulation of GTPase activity (GO.0043087)	0.02860918691208	"4/8"	"4/129"	36	P
GO	budding cell apical bud growth (GO.0007118)	0.0437154986787168	"5/15"	"5/129"	36	P
Literature	Lemmon.MA..2004..Pleckstrin.homology.domains..not.just.for.phosphoinositides..Biochem.Soc.Trans.32.Pt.5..707.11	0.000210946900975529	"12/30"	"12/129"	36	P
Literature	Yu.JW..et.al...2004..Genome.wide.analysis.of.membrane.targeting.by.S..cerevisiae.pleckstrin.homology.domains..Mol.Cell.13.5..677.88	0.000210946900975529	"12/30"	"12/129"	36	P
Literature	Brinkworth.RI..et.al...2006..Protein.kinases.associated.with.the.yeast.phosphoproteome..BMC.Bioinformatics.7...47	0.000479847222006316	"20/98"	"20/129"	36	P
Literature	Rubenstein.EM.and.Schmidt.MC..2007..Mechanisms.regulating.the.protein.kinases.of.Saccharomyces.cerevisiae..Eukaryot.Cell.6.4..571.83	0.000479847222006316	"20/97"	"20/129"	36	P
Literature	Hunter.T.and.Plowman.GD..1997..The.protein.kinases.of.budding.yeast..six.score.and.more..Trends.Biochem.Sci.22.1..18.22	0.00048542910293123	"21/111"	"21/129"	36	P
Literature	Miranda.Saavedra.D..et.al...2007..The.complement.of.protein.kinases.of.the.microsporidium.Encephalitozoon.cuniculi.in.relation.to.those.of.Saccharomyces.cerevisiae.and.Schizosaccharomyces.pombe..BMC.Genomics.8.1..309	0.00048542910293123	"20/100"	"20/129"	36	P
Literature	Zhu.H..et.al...2000..Analysis.of.yeast.protein.kinases.using.protein.chips..Nat.Genet.26.3..283.9	0.00048542910293123	"20/101"	"20/129"	36	P
Literature	Yoshida.S.and.Pellman.D..2008..Plugging.the.GAP.between.cell.polarity.and.cell.cycle..EMBO.Rep.9.1..39.41	0.000661363895959022	"7/10"	"7/129"	36	P
Literature	Ptacek.J..et.al...2005..Global.analysis.of.protein.phosphorylation.in.yeast..Nature.438.7068..679.84	0.00260639355939984	"15/65"	"15/129"	36	P
Literature	Martin.SG.and.Arkowitz.RA..2014..Cell.polarization.in.budding.and.fission.yeasts..FEMS.Microbiol.Rev.38.2..228.53	0.00307581517768833	"10/28"	"10/129"	36	P
Literature	Conrad.M..et.al...2014..Nutrient.sensing.and.signaling.in.the.yeast.Saccharomyces.cerevisiae..FEMS.Microbiol.Rev.38.2..254.99	0.00330626081133258	"19/106"	"19/129"	36	P
Literature	Leon.S.and.Haguenauer.Tsapis.R..2009..Ubiquitin.ligase.adaptors..regulators.of.ubiquitylation.and.endocytosis.of.plasma.membrane.proteins..Exp.Cell.Res.315.9..1574.83	0.00330626081133258	"8/17"	"8/129"	36	P
Literature	Howell.AS.and.Lew.DJ..2012..Morphogenesis.and.the.cell.cycle..Genetics.190.1..51.77	0.00440212874922845	"13/52"	"13/129"	36	P
Literature	Zanelli.CF.and.Valentini.SR..2005..Pkc1.acts.through.Zds1.and.Gic1.to.suppress.growth.and.cell.polarity.defects.of.a.yeast.eIF5A.mutant..Genetics.171.4..1571.81	0.00808010187439896	"9/25"	"9/129"	36	P
Literature	Ubersax.JA..et.al...2003..Targets.of.the.cyclin.dependent.kinase.Cdk1..Nature.425.6960..859.64	0.00820052552111688	"23/159"	"23/129"	36	P
Literature	Crapeau.M..et.al...2014..Stress.Conditions.Promote.Yeast.Gap1.Permease.Ubiquitylation.and.Down.regulation.via.the.Arrestin.like.Bul.and.Aly.Proteins..J.Biol.Chem.289.32..22103.16	0.0117663091617494	"6/10"	"6/129"	36	P
Literature	Chang.EJ..et.al...2007..Prediction.of.cyclin.dependent.kinase.phosphorylation.substrates..PLoS.One.2.7..e656	0.0122177113034179	"16/86"	"16/129"	36	P
Literature	Pereira.RR..et.al...2015..Detailed.search.for.protein.kinase.s..involved.in.plasma.membrane.H..ATPase.activity.regulation.of.yeast.cells..FEMS.Yeast.Res.15.2.	0.012787551464528	"7/15"	"7/129"	36	P
Literature	Nikko.E.and.Pelham.HR..2009..Arrestin.mediated.endocytosis.of.yeast.plasma.membrane.transporters..Traffic.10.12..1856.67	0.0145120139580559	"8/21"	"8/129"	36	P
Literature	Mazon.MJ..et.al...2015..Specific.phosphoantibodies.reveal.two.phosphorylation.sites.in.yeast.Pma1.in.response.to.glucose..FEMS.Yeast.Res.15.5.	0.0186883678939785	"7/16"	"7/129"	36	P
Literature	Zou.J..et.al...2009..Regulation.of.cell.polarity.through.phosphorylation.of.Bni4.by.Pho85.G1.cyclin.dependent.kinases.in.Saccharomyces.cerevisiae..Mol.Biol.Cell.20.14..3239.50	0.0186883678939785	"14/70"	"14/129"	36	P
Literature	Chen.MX..et.al...1993..PPQ..a.novel.protein.phosphatase.containing.a.Ser...Asn.rich.amino.terminal.domain..is.involved.in.the.regulation.of.protein.synthesis..Eur.J.Biochem.218.2..689.99	0.0187249311317995	"4/4"	"4/129"	36	P
Literature	Miranda.Saavedra.D.and.Barton.GJ..2007..Classification.and.functional.annotation.of.eukaryotic.protein.kinases..Proteins.68.4..893.914	0.0187249311317995	"9/29"	"9/129"	36	P
Literature	Russell.M..et.al...1993..Changes.in.gene.expression.in.the.Ras.adenylate.cyclase.system.of.Saccharomyces.cerevisiae..correlation.with.cAMP.levels.and.growth.arrest..Mol.Biol.Cell.4.7..757.65	0.0187249311317995	"4/4"	"4/129"	36	P
Literature	Smith.GR..et.al...2002..GTPase.activating.proteins.for.Cdc42..Eukaryot.Cell.1.3..469.80	0.0187249311317995	"4/4"	"4/129"	36	P
Literature	Donovan.S..et.al...2002..GTPase.activating.proteins..critical.regulators.of.intracellular.signaling..Biochim.Biophys.Acta.1602.1..23.45	0.0386255318902845	"7/18"	"7/129"	36	P
Literature	Wang.Y..2009..CDKs.and.the.yeast.hyphal.decision..Curr.Opin.Microbiol.12.6..644.9	0.0407831001464399	"5/8"	"5/129"	36	P
Literature	Lin.CH..et.al...2008..Arrestin.related.ubiquitin.ligase.adaptors.regulate.endocytosis.and.protein.turnover.at.the.cell.surface..Cell.135.4..714.25	0.04854730681038	"6/13"	"6/129"	36	P
GO	extracellular region (GO.0005576)	1.25080887361901e-42	"33/47"	"33/67"	37	Q
GO	fungal-type cell wall (GO.0009277)	6.37977907567311e-37	"30/46"	"30/67"	37	Q
GO	cell wall (GO.0005618)	4.03480370845235e-34	"25/31"	"25/67"	37	Q
GO	anchored component of membrane (GO.0031225)	2.42916480658844e-24	"20/29"	"20/67"	37	Q
GO	cell wall organization (GO.0071555)	1.0142764197174e-20	"23/59"	"23/67"	37	Q
GO	fungal-type cell wall organization (GO.0031505)	1.40840622084835e-19	"24/74"	"24/67"	37	Q
GO	fungal-type vacuole (GO.0000324)	3.58705433745212e-13	"24/132"	"24/67"	37	Q
GO	structural constituent of cell wall (GO.0005199)	3.24656822323282e-07	"7/11"	"7/67"	37	Q
GO	hydrolase activity, acting on glycosyl bonds (GO.0016798)	7.9039356205373e-06	"8/23"	"8/67"	37	Q
GO	carbohydrate metabolic process (GO.0005975)	2.96847722170306e-05	"8/27"	"8/67"	37	Q
GO	anchored component of external side of plasma membrane (GO.0031362)	7.33103255844109e-05	"5/8"	"5/67"	37	Q
GO	polysaccharide catabolic process (GO.0000272)	0.000258276648785621	"4/5"	"4/67"	37	Q
GO	cell surface (GO.0009986)	0.000268181450469272	"5/10"	"5/67"	37	Q
GO	glucosidase activity (GO.0015926)	0.000651292108396517	"4/6"	"4/67"	37	Q
GO	cell periphery (GO.0071944)	0.00363456799334097	"14/160"	"14/67"	37	Q
GO	response to heat (GO.0009408)	0.00465138545968967	"5/17"	"5/67"	37	Q
GO	metabolic process (GO.0008152)	0.00493702994721975	"9/70"	"9/67"	37	Q
GO	1,3-beta-glucanosyltransferase activity (GO.0042124)	0.00561206554805093	"3/4"	"3/67"	37	Q
GO	membrane (GO.0016020)	0.00871590632010758	"36/820"	"36/67"	37	Q
GO	hydrolase activity, hydrolyzing O-glycosyl compounds (GO.0004553)	0.00909795410135811	"4/11"	"4/67"	37	Q
GO	cellular bud scar (GO.0005621)	0.0112679077265523	"3/5"	"3/67"	37	Q
GO	cell adhesion (GO.0007155)	0.0112679077265523	"3/5"	"3/67"	37	Q
Literature	Coronado.JE..et.al...2007..Conserved.processes.and.lineage.specific.proteins.in.fungal.cell.wall.evolution..Eukaryot.Cell.6.12..2269.77	3.42814029063937e-38	"36/70"	"36/67"	37	Q
Literature	De.Groot.PW..et.al...2005..Features.and.functions.of.covalently.linked.proteins.in.fungal.cell.walls..Fungal.Genet.Biol.42.8..657.75	4.17323488153497e-18	"15/18"	"15/67"	37	Q
Literature	Hsu.PH..et.al...2015..Characterization.of.Cell.Wall.Proteins.in.Saccharomyces.cerevisiae.Clinical.Isolates.Elucidates.Hsp150p.in.Virulence..PLoS.One.10.8..e0135174	4.17323488153497e-18	"15/18"	"15/67"	37	Q
Literature	Yin.QY..et.al...2005..Comprehensive.proteomic.analysis.of.Saccharomyces.cerevisiae.cell.walls..identification.of.proteins.covalently.attached.via.glycosylphosphatidylinositol.remnants.or.mild.alkali.sensitive.linkages..J.Biol.Chem.280.21..20894.901	4.17323488153497e-18	"14/15"	"14/67"	37	Q
Literature	Bowen.S..et.al...2005..Patterns.of.polymorphism.and.divergence.in.stress.related.yeast.proteins..Yeast.22.8..659.68	1.00530099667766e-17	"17/27"	"17/67"	37	Q
Literature	Klis.FM..et.al...2006..Cell.wall.construction.in.Saccharomyces.cerevisiae..Yeast.23.3..185.202	1.00530099667766e-17	"18/32"	"18/67"	37	Q
Literature	Free.SJ..2013..Fungal.cell.wall.organization.and.biosynthesis..Adv.Genet.81...33.82	2.50091802903635e-16	"17/31"	"17/67"	37	Q
Literature	Orlean.P..2012..Architecture.and.Biosynthesis.of.the.Saccharomyces.cerevisiae.Cell.Wall..Genetics.192.3..775.818	2.44714976906383e-15	"24/93"	"24/67"	37	Q
Literature	Yin.QY..et.al...2007..Mass.spectrometric.quantitation.of.covalently.bound.cell.wall.proteins.in.Saccharomyces.cerevisiae..FEMS.Yeast.Res.7.6..887.96	3.40471733338618e-15	"12/13"	"12/67"	37	Q
Literature	Bailey.UM..et.al...2012..Analysis.of.congenital.disorder.of.glycosylation.Id.in.a.yeast.model.system.shows.diverse.site.specific.under.glycosylation.of.glycoproteins..J.Proteome.Res.11.11..5376.83	1.11491475963167e-14	"11/11"	"11/67"	37	Q
Literature	Hamada.K..et.al...1999..Amino.acid.residues.in.the.omega.minus.region.participate.in.cellular.localization.of.yeast.glycosylphosphatidylinositol.attached.proteins..J.Bacteriol.181.13..3886.9	4.0064602863696e-11	"11/16"	"11/67"	37	Q
Literature	Lesage.G.and.Bussey.H..2006..Cell.wall.assembly.in.Saccharomyces.cerevisiae..Microbiol.Mol.Biol.Rev.70.2..317.43	3.51340199128771e-10	"15/45"	"15/67"	37	Q
Literature	Lengeler.KB..et.al...2008..Protein.O.mannosyltransferases.in.virulence.and.development..Cell.Mol.Life.Sci.65.4..528.44	4.85597527409507e-09	"11/22"	"11/67"	37	Q
Literature	Birkaya.B..et.al...2009..Role.of.the.cell.wall.integrity.and.filamentous.growth.mitogen.activated.protein.kinase.pathways.in.cell.wall.remodeling.during.filamentous.growth..Eukaryot.Cell.8.8..1118.33	6.36598789532167e-09	"12/29"	"12/67"	37	Q
Literature	Breidenbach.MA..et.al...2012..Mapping.yeast.N.glycosites.with.isotopically.recoded.glycans..Mol.Cell.Proteomics.11.6..M111.015339	2.43577070627334e-08	"12/32"	"12/67"	37	Q
Literature	Richard.GF.and.Dujon.B..2006..Molecular.evolution.of.minisatellites.in.hemiascomycetous.yeasts..Mol.Biol.Evol.23.1..189.202	2.43064519662815e-07	"12/38"	"12/67"	37	Q
Literature	Mrsa.V..et.al...1997..Specific.labelling.of.cell.wall.proteins.by.biotinylation..Identification.of.four.covalently.linked.O.mannosylated.proteins.of.Saccharomyces.cerevisiae..Yeast.13.12..1145.54	8.84375507879002e-07	"7/9"	"7/67"	37	Q
Literature	Slattery.MG..et.al...2006..The.function.and.properties.of.the.Azf1.transcriptional.regulator.change.with.growth.conditions.in.Saccharomyces.cerevisiae..Eukaryot.Cell.5.2..313.20	1.05953532599543e-06	"11/34"	"11/67"	37	Q
Literature	Teparic.R.and.Mrsa.V..2013..Proteins.involved.in.building..maintaining.and.remodeling.of.yeast.cell.walls..Curr.Genet.59.4..171.85	1.05953532599543e-06	"10/26"	"10/67"	37	Q
Literature	Jung.US.and.Levin.DE..1999..Genome.wide.analysis.of.gene.expression.regulated.by.the.yeast.cell.wall.integrity.signalling.pathway..Mol.Microbiol.34.5..1049.57	1.52955780335824e-06	"9/20"	"9/67"	37	Q
Literature	Agarwal.AK..et.al...2003..Genome.wide.expression.profiling.of.the.response.to.polyene..pyrimidine..azole..and.echinocandin.antifungal.agents.in.Saccharomyces.cerevisiae..J.Biol.Chem.278.37..34998.5015	1.9339360392334e-06	"11/36"	"11/67"	37	Q
Literature	Adams.DJ..2004..Fungal.cell.wall.chitinases.and.glucanases..Microbiology.150.Pt.7..2029.35	2.54488092719051e-06	"8/15"	"8/67"	37	Q
Literature	Verstrepen.KJ..et.al...2005..Intragenic.tandem.repeats.generate.functional.variability..Nat.Genet.37.9..986.90	3.01608250599491e-06	"10/29"	"10/67"	37	Q
Literature	Garcia.R..et.al...2009..The.High.Osmotic.Response.and.Cell.Wall.Integrity.Pathways.Cooperate.to.Regulate.Transcriptional.Responses.to.Zymolyase.induced.Cell.Wall.Stress.in.Saccharomyces.cerevisiae..J.Biol.Chem.284.16..10901.11	1.06879319484376e-05	"11/42"	"11/67"	37	Q
Literature	Rowe.JD..et.al...2010..Systematic.identification.of.yeast.proteins.extracted.into.model.wine.during.aging.on.the.yeast.lees..J.Agric.Food.Chem.58.4..2337.46	1.99553536562358e-05	"6/8"	"6/67"	37	Q
Literature	Borovikova.D..et.al...2016..Anhydrobiosis.in.yeast..cell.wall.mannoproteins.are.important.for.yeast.Saccharomyces.cerevisiae.resistance.to.dehydration..Yeast.33.8..347.53	5.43178798870296e-05	"6/9"	"6/67"	37	Q
Literature	Teparic.R..et.al...2004..Increased.mortality.of.Saccharomyces.cerevisiae.cell.wall.protein.mutants..Microbiology.150.Pt.10..3145.50	5.43178798870296e-05	"6/9"	"6/67"	37	Q
Literature	Boorsma.A..et.al...2004..Characterization.of.the.transcriptional.response.to.cell.wall.stress.in.Saccharomyces.cerevisiae..Yeast.21.5..413.27	7.59421850440324e-05	"9/30"	"9/67"	37	Q
Literature	Nunez.LR..et.al...2008..Cell.wall.integrity.MAPK.pathway.is.essential.for.lipid.homeostasis..J.Biol.Chem.283.49..34204.17	0.000124956386383238	"8/23"	"8/67"	37	Q
Literature	Coronado.JE..et.al...2006..Composition.modified.matrices.improve.identification.of.homologs.of.saccharomyces.cerevisiae.low.complexity.glycoproteins..Eukaryot.Cell.5.4..628.37	0.000138830523525931	"5/6"	"5/67"	37	Q
Literature	Kock.C..et.al...2015..Up.against.the.wall..is.yeast.cell.wall.integrity.ensured.by.mechanosensing.in.plasma.membrane.microdomains..Appl.Environ.Microbiol.81.3..806.11	0.000138830523525931	"5/6"	"5/67"	37	Q
Literature	Smits.GJ..et.al...1999..Cell.wall.dynamics.in.yeast..Curr.Opin.Microbiol.2.4..348.52	0.000138830523525931	"5/6"	"5/67"	37	Q
Literature	Teparic.R..et.al...2007..Binding.assay.for.incorporation.of.alkali.extractable.proteins.in.the.Saccharomyces.cerevisiae.cell.wall..Yeast.24.4..259.66	0.000138830523525931	"5/6"	"5/67"	37	Q
Literature	Molina.M..et.al...2000..Protein.localisation.approaches.for.understanding.yeast.cell.wall.biogenesis..Microsc.Res.Tech.51.6..601.12	0.000202922232868863	"7/17"	"7/67"	37	Q
Literature	Wu.CY..et.al...2010..Control.of.transcription.by.cell.size..PLoS.Biol.8.11..e1000523	0.000432052207121339	"8/27"	"8/67"	37	Q
Literature	Weig.M..et.al...2004..Systematic.identification.in.silico.of.covalently.bound.cell.wall.proteins.and.analysis.of.protein.polysaccharide.linkages.of.the.human.pathogen.Candida.glabrata..Microbiology.150.Pt.10..3129.44	0.000436575824741252	"5/7"	"5/67"	37	Q
Literature	Mamoun.CB..et.al...1999..Disruption.of.YHC8..a.member.of.the.TSR1.gene.family..reveals.its.direct.involvement.in.yeast.protein.translocation..J.Biol.Chem.274.16..11296.302	0.000847366810499204	"4/4"	"4/67"	37	Q
Literature	Miura.S..et.al...2000..Screening.of.genes.involved.in.isooctane.tolerance.in.saccharomyces.cerevisiae.by.using.mRNA.differential.display.Appl.Environ.Microbiol.66.11..4883.9	0.000847366810499204	"4/4"	"4/67"	37	Q
Literature	Kwon.SW..2004..Profiling.of.soluble.proteins.in.wine.by.nano.high.performance.liquid.chromatography.tandem.mass.spectrometry..J.Agric.Food.Chem.52.24..7258.63	0.00105332836169616	"5/8"	"5/67"	37	Q
Literature	Ketela.T..et.al...1999..Saccharomyces.cerevisiae.mid2p.is.a.potential.cell.wall.stress.sensor.and.upstream.activator.of.the.PKC1.MPK1.cell.integrity.pathway..J.Bacteriol.181.11..3330.40	0.00226490838231628	"5/9"	"5/67"	37	Q
Literature	Arroyo.J..et.al...2007..The.GPI.anchored.Gas.and.Crh.families.are.fungal.antigens..Yeast.24.4..289.96	0.00367171095082026	"4/5"	"4/67"	37	Q
Literature	Heinisch.JJ..et.al...2010..Measurement.of.the.mechanical.behavior.of.yeast.membrane.sensors.using.single.molecule.atomic.force.microscopy..Nat.Protoc.5.4..670.7	0.00367171095082026	"4/5"	"4/67"	37	Q
Literature	Lodder.AL..et.al...1999..Characterization.of.the.Wsc1.protein..a.putative.receptor.in.the.stress.response.of.Saccharomyces.cerevisiae..Genetics.152.4..1487.99	0.00367171095082026	"4/5"	"4/67"	37	Q
Literature	de.Lichtenberg.U..et.al...2003..Protein.feature.based.identification.of.cell.cycle.regulated.proteins.in.yeast..J.Mol.Biol.329.4..663.74	0.0040363606422809	"5/10"	"5/67"	37	Q
Literature	Ragni.E..et.al...2011..The.genetic.interaction.network.of.CCW12..a.Saccharomyces.cerevisiae.gene.required.for.cell.wall.integrity.during.budding.and.formation.of.mating.projections..BMC.Genomics.12...107	0.00476482757201844	"8/37"	"8/67"	37	Q
Literature	Singh.LN.and.Hannenhalli.S..2010..Correlated.changes.between.regulatory.cis.elements.and.condition.specific.expression.in.paralogous.gene.families..Nucleic.Acids.Res.38.3..738.49	0.00587022719486153	"6/18"	"6/67"	37	Q
Literature	Braley.R.and.Chaffin.WL..1999..Variations.in.mRNA.transcript.levels.of.cell.wall.associated.genes.of.Saccharomyces.cerevisiae.following.spheroplasting..FEMS.Microbiol.Lett.181.1..177.85	0.00638290523800818	"5/11"	"5/67"	37	Q
Literature	Inoue.T..et.al...2012..Characterization.and.isolation.of.mutants.producing.increased.amounts.of.isoamyl.acetate.derived.from.hygromycin.B.resistant.sake.yeast..Biosci.Biotechnol.Biochem.76.1..60.6	0.00638290523800818	"5/11"	"5/67"	37	Q
Literature	Manjithaya.R..et.al...2010..A.yeast.MAPK.cascade.regulates.pexophagy.but.not.other.autophagy.pathways..J.Cell.Biol.189.2..303.10	0.00638290523800818	"5/11"	"5/67"	37	Q
Literature	Terashima.H..et.al...2002..Sequence.based.approach.for.identification.of.cell.wall.proteins.in.Saccharomyces.cerevisiae..Curr.Genet.40.5..311.6	0.00638290523800818	"5/11"	"5/67"	37	Q
Literature	Aronova.S..et.al...2007..Probing.the.Membrane.Environment.of.the.TOR.Kinases.Reveals.Functional.Interactions.between.TORC1..Actin..and.Membrane.Trafficking.in.Saccharomyces.cerevisiae..Mol.Biol.Cell.18.8..2779.94	0.00643157949990892	"8/39"	"8/67"	37	Q
Literature	Rojas.M..et.al...2008..Genomewide.expression.profiling.of.cryptolepine.induced.toxicity.in.Saccharomyces.cerevisiae..Antimicrob.Agents.Chemother.52.11..3844.50	0.00743729477491353	"6/19"	"6/67"	37	Q
Literature	Cappellaro.C..et.al...1998..New.potential.cell.wall.glucanases.of.Saccharomyces.cerevisiae.and.their.involvement.in.mating..J.Bacteriol.180.19..5030.7	0.0078726762390356	"4/6"	"4/67"	37	Q
Literature	De.Groot.PW..et.al...2003..Genome.wide.identification.of.fungal.GPI.proteins..Yeast.20.9..781.96	0.0078726762390356	"4/6"	"4/67"	37	Q
Literature	Guyard.C..et.al...2002..Characterization.of.a.Williopsis.saturnus.var..mrakii.high.molecular.weight.secreted.killer.toxin.with.broad.spectrum.antimicrobial.activity..J.Antimicrob.Chemother.49.6..961.71	0.0078726762390356	"4/6"	"4/67"	37	Q
Literature	Klis.FM..et.al...2010..Covalently.linked.wall.proteins.in.ascomycetous.fungi..Yeast.27.8..489.93	0.0078726762390356	"4/6"	"4/67"	37	Q
Literature	Moukadiri.I..et.al...1999..Identification.of.two.mannoproteins.released.from.cell.walls.of.a.Saccharomyces.cerevisiae.mnn1.mnn9.double.mutant.by.reducing.agents..J.Bacteriol.181.16..4741.5	0.0078726762390356	"4/6"	"4/67"	37	Q
Literature	Nanduri.J.and.Tartakoff.AM..2001..The.arrest.of.secretion.response.in.yeast..signaling.from.the.secretory.path.to.the.nucleus.via.Wsc.proteins.and.Pkc1p..Mol.Cell.8.2..281.9	0.0078726762390356	"4/6"	"4/67"	37	Q
Literature	Tanaka.T..et.al...2012..Recent.developments.in.yeast.cell.surface.display.toward.extended.applications.in.biotechnology..Appl.Microbiol.Biotechnol.95.3..577.91	0.0078726762390356	"4/6"	"4/67"	37	Q
Literature	Iyer.VR..et.al...2001..Genomic.binding.sites.of.the.yeast.cell.cycle.transcription.factors.SBF.and.MBF..Nature.409.6819..533.8	0.00946366480263008	"9/55"	"9/67"	37	Q
Literature	Mollapour.M..et.al...2009..Presence.of.the.Fps1p.aquaglyceroporin.channel.is.essential.for.Hog1p.activation..but.suppresses.Slt2.Mpk1.p.activation..with.acetic.acid.stress.of.yeast..Microbiology.155.Pt.10..3304.11	0.0137768202231665	"5/13"	"5/67"	37	Q
Literature	Zeitlinger.J..et.al...2003..Program.specific.distribution.of.a.transcription.factor.dependent.on.partner.transcription.factor.and.MAPK.signaling..Cell.113.3..395.404	0.0137768202231665	"8/44"	"8/67"	37	Q
Literature	Rintala.E..et.al...2009..Low.oxygen.levels.as.a.trigger.for.enhancement.of.respiratory.metabolism.in.Saccharomyces.cerevisiae..BMC.Genomics.10...461	0.0156513433272882	"12/108"	"12/67"	37	Q
Literature	Hamada.K..et.al...1998..Screening.for.glycosylphosphatidylinositol..GPI..dependent.cell.wall.proteins.in.Saccharomyces.cerevisiae..Mol.Gen.Genet.258.1.2..53.9	0.0158634247162138	"4/7"	"4/67"	37	Q
Literature	Palmisano.G..et.al...2010..Glycoproteomic.profile.in.wine..a..sweet..molecular.renaissance..J.Proteome.Res.9.12..6148.59	0.0158634247162138	"4/7"	"4/67"	37	Q
Literature	Verna.J..et.al...1997..A.family.of.genes.required.for.maintenance.of.cell.wall.integrity.and.for.the.stress.response.in.Saccharomyces.cerevisiae..Proc.Natl.Acad.Sci.U.S.A.94.25..13804.9	0.0158634247162138	"4/7"	"4/67"	37	Q
Literature	Zu.T..et.al...2001..Mutations.in.WSC.genes.for.putative.stress.receptors.result.in.sensitivity.to.multiple.stress.conditions.and.impairment.of.Rlm1.dependent.gene.expression.in.Saccharomyces.cerevisiae..Mol.Genet.Genomics.266.1..142.55	0.0158634247162138	"4/7"	"4/67"	37	Q
Literature	Abe.H..et.al...2004..Yeast.cells.harboring.human.alpha.1.3.fucosyltransferase.at.the.cell.surface.engineered.using.Pir..a.cell.wall.anchored.protein..FEMS.Yeast.Res.4.4.5..417.25	0.0165903561256559	"3/3"	"3/67"	37	Q
Literature	Cabib.E..et.al...2008..Assembly.of.the.Yeast.Cell.Wall..Crh1p.AND.Crh2p.ACT.AS.TRANSGLYCOSYLASES.IN.VIVO.AND.IN.VITRO..J.Biol.Chem.283.44..29859.72	0.0165903561256559	"3/3"	"3/67"	37	Q
Literature	de.Groot.PW..et.al...2004..Proteomic.analysis.of.Candida.albicans.cell.walls.reveals.covalently.bound.carbohydrate.active.enzymes.and.adhesins..Eukaryot.Cell.3.4..955.65	0.0165903561256559	"3/3"	"3/67"	37	Q
Literature	Dranginis.AM..et.al...2007..A.biochemical.guide.to.yeast.adhesins..glycoproteins.for.social.and.antisocial.occasions..Microbiol.Mol.Biol.Rev.71.2..282.94	0.0165903561256559	"3/3"	"3/67"	37	Q
Literature	Huang.G..et.al...2009..Conserved.WCPL.and.CX4C.Domains.Mediate.Several.Mating.Adhesin.Interactions.in.Saccharomyces.cerevisiae..Genetics.182.1..173.89	0.0165903561256559	"3/3"	"3/67"	37	Q
Literature	Maddi.A..et.al...2012..WSC.1.and.HAM.7.Are.MAK.1.MAP.Kinase.Pathway.Sensors.Required.for.Cell.Wall.Integrity.and.Hyphal.Fusion.in.Neurospora.crassa..PLoS.One.7.8..e42374	0.0165903561256559	"3/3"	"3/67"	37	Q
Literature	Mrsa.V.and.Tanner.W..1999..Role.of.NaOH.extractable.cell.wall.proteins.Ccw5p..Ccw6p..Ccw7p.and.Ccw8p..members.of.the.Pir.protein.family..in.stability.of.the.Saccharomyces.cerevisiae.cell.wall..Yeast.15.10A..813.20	0.0165903561256559	"3/3"	"3/67"	37	Q
Literature	Ramsook.C..et.al...2010..Yeast.cell.adhesion.molecules.have.functional.amyloid.forming.sequences..Eukaryot.Cell.9.3..393.404	0.0165903561256559	"3/3"	"3/67"	37	Q
Literature	Toh.e.A..et.al...1993..Three.yeast.genes..PIR1..PIR2.and.PIR3..containing.internal.tandem.repeats..are.related.to.each.other..and.PIR1.and.PIR2.are.required.for.tolerance.to.heat.shock..Yeast.9.5..481.94	0.0165903561256559	"3/3"	"3/67"	37	Q
Literature	Xie.X..et.al...2011..Accelerated.and.adaptive.evolution.of.yeast.sexual.adhesins..Mol.Biol.Evol.28.11..3127.37	0.0165903561256559	"3/3"	"3/67"	37	Q
Literature	Yang.N..et.al...2014..The.contribution.of.Pir.protein.family.to.yeast.cell.surface.display..Appl.Microbiol.Biotechnol.98.7..2897.905	0.0165903561256559	"3/3"	"3/67"	37	Q
Literature	Yun.DJ..et.al...1997..Stress.proteins.on.the.yeast.cell.surface.determine.resistance.to.osmotin..a.plant.antifungal.protein..Proc.Natl.Acad.Sci.U.S.A.94.13..7082.7	0.0165903561256559	"3/3"	"3/67"	37	Q
Literature	Delley.PA.and.Hall.MN..1999..Cell.wall.stress.depolarizes.cell.growth.via.hyperactivation.of.RHO1..J.Cell.Biol.147.1..163.74	0.025115892841765	"4/8"	"4/67"	37	Q
Literature	Iwahashi.H..et.al...2005..Adaptation.of.Saccharomyces.cerevisiae.to.high.hydrostatic.pressure.causing.growth.inhibition..FEBS.Lett.579.13..2847.52	0.025115892841765	"4/8"	"4/67"	37	Q
Literature	Rodicio.R.and.Heinisch.JJ..2010..Together.we.are.strong.cell.wall.integrity.sensors.in.yeasts..Yeast.27.8..531.40	0.025115892841765	"4/8"	"4/67"	37	Q
Literature	Wolf.JJ..et.al...2010..Feed.forward.regulation.of.a.cell.fate.determinant.by.an.RNA.binding.protein.generates.asymmetry.in.yeast..Genetics.185.2..513.22	0.025115892841765	"4/8"	"4/67"	37	Q
Literature	Lopez.Garcia.B..et.al...2010..A.genomic.approach.highlights.common.and.diverse.effects.and.determinants.of.susceptibility.on.the.yeast.Saccharomyces.cerevisiae.exposed.to.distinct.antimicrobial.peptides..BMC.Microbiol.10...289	0.0289197091601417	"7/37"	"7/67"	37	Q
Literature	Bermejo.C..et.al...2008..The.Sequential.Activation.of.the.Yeast.HOG.and.SLT2.Pathways.Is.Required.for.Cell.Survival.to.Cell.Wall.Stress..Mol.Biol.Cell.19.3..1113.24	0.0335025392490389	"6/26"	"6/67"	37	Q
Literature	Forsmark.A..et.al...2011..Quantitative.proteomics.of.yeast.post.Golgi.vesicles.reveals.a.discriminating.role.for.Sro7p.in.protein.secretion..Traffic.12.6..740.53	0.0339268468582491	"7/38"	"7/67"	37	Q
Literature	Chou.S..et.al...2006..Regulation.of.mating.and.filamentation.genes.by.two.distinct.Ste12.complexes.in.Saccharomyces.cerevisiae..Mol.Cell.Biol.26.13..4794.805	0.041240721810962	"6/27"	"6/67"	37	Q
Literature	Kock.C..et.al...2016..Yeast.cell.wall.integrity.sensors.form.specific.plasma.membrane.microdomains.important.for.signalling..Cell.Microbiol.18.9..1251.67	0.0418163332082451	"4/9"	"4/67"	37	Q
Literature	Cabib.E..et.al...2007..Crh1p.and.Crh2p.are.required.for.the.cross.linking.of.chitin.to.beta.1.6.glucan.in.the.Saccharomyces.cerevisiae.cell.wall..Mol.Microbiol.63.3..921.35	0.0455394045956668	"3/4"	"3/67"	37	Q
Literature	Cabib.E..et.al...2012..Presence.of.a.large...1.3.glucan.linked.to.chitin.at.the.Saccharomyces.cerevisiae.mother.bud.neck.suggests.involvement.in.localized.growth.control..Eukaryot.Cell.11.4..388.400	0.0455394045956668	"3/4"	"3/67"	37	Q
Literature	Camougrand.NM..et.al...2000..The.SUN.family..UTH1..an.ageing.gene..is.also.involved.in.the.regulation.of.mitochondria.biogenesis.in.Saccharomyces.cerevisiae..Arch.Biochem.Biophys.375.1..154.60	0.0455394045956668	"3/4"	"3/67"	37	Q
Literature	Kuznetsov.E..et.al...2013..SUN.Family.Proteins.Sun4p..Uth1p.and.Sim1p.Are.Secreted.from.Saccharomyces.cerevisiae.and.Produced.Dependently.on.Oxygen.Level..PLoS.One.8.9..e73882	0.0455394045956668	"3/4"	"3/67"	37	Q
Literature	Li.YD..et.al...2009..The.rapid.evolution.of.signal.peptides.is.mainly.caused.by.relaxed.selection.on.non.synonymous.and.synonymous.sites..Gene.436.1.2..8.11	0.0455394045956668	"3/4"	"3/67"	37	Q
Literature	Mazan.M..et.al...2008..Phenotype.analysis.of.Saccharomyces.cerevisiae.mutants.with.deletions.in.Pir.cell.wall.glycoproteins..Antonie.Van.Leeuwenhoek.94.2..335.42	0.0455394045956668	"3/4"	"3/67"	37	Q
Literature	Mazan.M..et.al...2011..Catalytic.properties.of.the.Gas.family....1.3..glucanosyltransferases.active.in.fungal.cell.wall.biogenesis.as.determined.by.a.novel.fluorescent.assay..Biochem.J.438.2..275.82	0.0455394045956668	"3/4"	"3/67"	37	Q
Literature	Mouassite.M..et.al...2000..The..SUN..family..yeast.SUN4.SCW3.is.involved.in.cell.septation..Yeast.16.10..905.19	0.0455394045956668	"3/4"	"3/67"	37	Q
Literature	Mouassite.M..et.al...2000..The.SUN.family.of.Saccharomyces.cerevisiae..the.double.knock.out.of.UTH1.and.SIM1.promotes.defects.in.nucleus.migration.and.increased.drug.sensitivity..FEMS.Microbiol.Lett.182.1..137.41	0.0455394045956668	"3/4"	"3/67"	37	Q
Literature	Mouyna.I..et.al...2000..Glycosylphosphatidylinositol.anchored.glucanosyltransferases.play.an.active.role.in.the.biosynthesis.of.the.fungal.cell.wall..J.Biol.Chem.275.20..14882.9	0.0455394045956668	"3/4"	"3/67"	37	Q
Literature	Mouyna.I..et.al...2000..Identification.of.the.catalytic.residues.of.the.first.family.of.beta.1.3.glucanosyltransferases.identified.in.fungi..Biochem.J.347.Pt.3...741.7	0.0455394045956668	"3/4"	"3/67"	37	Q
Literature	Omi.K..et.al...1999..Cloning.and.characterization.of.psu1.....a.new.essential.fission.yeast.gene.involved.in.cell.wall.synthesis..Biochem.Biophys.Res.Commun.262.2..368.74	0.0455394045956668	"3/4"	"3/67"	37	Q
Literature	Papaleo.E..et.al...2006..Three.dimensional.structure.of.the.catalytic.domain.of.the.yeast.beta..1.3..glucan.transferase.Gas1..a.molecular.modeling.investigation..J.Mol.Model.12.2..237.48	0.0455394045956668	"3/4"	"3/67"	37	Q
Literature	Pardo.M..et.al...1999..Two.dimensional.analysis.of.proteins.secreted.by.Saccharomyces.cerevisiae.regenerating.protoplasts..a.novel.approach.to.study.the.cell.wall..Yeast.15.6..459.72	0.0455394045956668	"3/4"	"3/67"	37	Q
Literature	Popolo.L.and.Vai.M..1999..The.Gas1.glycoprotein..a.putative.wall.polymer.cross.linker..Biochim.Biophys.Acta.1426.2..385.400	0.0455394045956668	"3/4"	"3/67"	37	Q
Literature	Ragni.E..et.al...2007..The.Gas.family.of.proteins.of.Saccharomyces.cerevisiae..characterization.and.evolutionary.analysis..Yeast.24.4..297.308	0.0455394045956668	"3/4"	"3/67"	37	Q
Literature	Rodicio.R..et.al...2008..Dissecting.sensor.functions.in.cell.wall.integrity.signaling.in.Kluyveromyces.lactis..Fungal.Genet.Biol.45.4..422.35	0.0455394045956668	"3/4"	"3/67"	37	Q
Literature	Rodriguez.Quinones.JF.and.Rodriguez.Medina.JR..2009..Differential.gene.expression.signatures.for.cell.wall.integrity.found.in.chitin.synthase.II..chs2Delta..and.myosin.II..myo1Delta..deficient.cytokinesis.mutants.of.Saccharomyces.cerevisiae..BMC.Res.Notes.2.87	0.0455394045956668	"5/18"	"5/67"	37	Q
Literature	Rolli.E..et.al...2010..GAS3..a.developmentally.regulated.gene..encodes.a.highly.mannosylated.and.inactive.protein.of.the.Gas.family.of.Saccharomyces.cerevisiae..Yeast.27.8..597.610	0.0455394045956668	"3/4"	"3/67"	37	Q
Literature	Schulz.BL.and.Aebi.M..2009..Analysis.of.glycosylation.site.occupancy.reveals.a.role.for.Ost3p.and.Ost6p.in.site.specific.N.glycosylation.efficiency..Mol.Cell.Proteomics.8.2..357.64	0.0455394045956668	"3/4"	"3/67"	37	Q
Literature	Sprowl.JA..et.al...2007..Changes.in.expression.of.cell.wall.turnover.genes.accompany.inhibition.of.chromosome.segregation.by.bovine.protein.kinase.C.alpha.expression.in.Saccharomyces.cerevisiae..Cell.Biol.Int.31.10..1160.72	0.0455394045956668	"3/4"	"3/67"	37	Q
Literature	Suntio.T..et.al...2011..ATPase.activity.of.a.yeast.secretory.glycoprotein.allows.ER.exit.during.inactivation.of.COPII.components.Sec24p.and.Sec13p..Yeast.28.6..453.65	0.0455394045956668	"3/4"	"3/67"	37	Q
Literature	Velours.G..et.al...2002..Dual.cell.wall.mitochondria.localization.of.the..SUN..family.proteins..FEMS.Microbiol.Lett.207.2..165.72	0.0455394045956668	"3/4"	"3/67"	37	Q
Literature	Vincent.M..et.al...2014..Surveying.the.floodgates..estimating.protein.flux.into.the.endoplasmic.reticulum.lumen.in.Saccharomyces.cerevisiae..Front.Physiol.5...444	0.0455394045956668	"10/88"	"10/67"	37	Q
Literature	Wanless.AG..et.al...2014..Cell.Morphogenesis.Proteins.Are.Translationally.Controlled.through.UTRs.by.the.Ndr.LATS.Target.Ssd1..PLoS.One.9.1..e85212	0.0455394045956668	"3/4"	"3/67"	37	Q
Literature	Simon.I..et.al...2001..Serial.regulation.of.transcriptional.regulators.in.the.yeast.cell.cycle..Cell.106.6..697.708	0.0471183500578265	"9/72"	"9/67"	37	Q
Literature	Curwin.AJ..et.al...2009..Phospholipid.Transfer.Protein.Sec14.Is.Required.for.Trafficking.from.Endosomes.and.Regulates.Distinct.trans.Golgi.Export.Pathways..J.Biol.Chem.284.11..7364.75	0.047258250530419	"6/29"	"6/67"	37	Q
Literature	de.Lucena.RM..et.al...2012..Participation.of.CWI..HOG.and.Calcineurin.pathways.in.the.tolerance.of.Saccharomyces.cerevisiae.to.low.pH.by.inorganic.acid..J.Appl.Microbiol.113.3..629.40	0.047258250530419	"6/29"	"6/67"	37	Q
Literature	Voth.WP..et.al...2007..Forkhead.proteins.control.the.outcome.of.transcription.factor.binding.by.antiactivation..EMBO.J.26.20..4324.34	0.047258250530419	"6/29"	"6/67"	37	Q
GO	positive regulation of transcription from RNA polymerase II promoter (GO.0045944)	0.00114001735122815	"21/141"	"21/119"	39	R
GO	DNA binding (GO.0003677)	0.00560812103765172	"32/320"	"32/119"	39	R
GO	RNA polymerase II core promoter proximal region sequence-specific DNA binding (GO.0000978)	0.0154707759138052	"12/68"	"12/119"	39	R
GO	transcription factor activity, sequence-specific DNA binding (GO.0003700)	0.0154707759138052	"10/50"	"10/119"	39	R
GO	transcription, DNA-templated (GO.0006351)	0.0154707759138052	"33/368"	"33/119"	39	R
GO	regulation of transcription, DNA-templated (GO.0006355)	0.0154707759138052	"33/366"	"33/119"	39	R
GO	sequence-specific DNA binding (GO.0043565)	0.0272094169271762	"16/125"	"16/119"	39	R
GO	transmembrane transport (GO.0055085)	0.0418669175036364	"16/131"	"16/119"	39	R
Literature	Beskow.A.and.Wright.AP..2006..Comparative.analysis.of.regulatory.transcription.factors.in.Schizosaccharomyces.pombe.and.budding.yeasts..Yeast.23.13..929.35	0.00308040914561202	"24/159"	"24/119"	39	R
Literature	Yu.H.and.Gerstein.M..2006..Genomic.analysis.of.the.hierarchical.structure.of.regulatory.networks..Proc.Natl.Acad.Sci.U.S.A.103.40..14724.31	0.00308040914561202	"29/218"	"29/119"	39	R
Literature	Soontorngun.N..2016..Reprogramming.of.nonfermentative.metabolism.by.stress.responsive.transcription.factors.in.the.yeast.Saccharomyces.cerevisiae..Curr.Genet...	0.00437121301084259	"12/42"	"12/119"	39	R
Literature	Zhao.Y..et.al...2008..Development.of.a.Novel.Oligonucleotide.Array.Based.Transcription.Factor.Assay.Platform.for.Genome.Wide.Active.Transcription.Factor.Profiling.in.Saccharomyces.cerevisiae..J.Proteome.Res.7.3..1315.1325	0.00720335658213185	"16/81"	"16/119"	39	R
Literature	Mazumder.A..et.al...2013..Genome.wide.single.cell.level.screen.for.protein.abundance.and.localization.changes.in.response.to.DNA.damage.in.S..cerevisiae..Nucleic.Acids.Res.41.20..9310.24	0.00763867961930231	"7/13"	"7/119"	39	R
Literature	Lai.WK.and.Buck.MJ..2013..An.integrative.approach.to.understanding.the.combinatorial.histone.code.at.functional.elements..Bioinformatics.29.18..2231.7	0.0221051417435575	"12/51"	"12/119"	39	R
Literature	Yu.T.and.Li.KC..2005..Inference.of.transcriptional.regulatory.network.by.two.stage.constrained.space.factor.analysis..Bioinformatics.21.21..4033.8	0.036425016307282	"12/54"	"12/119"	39	R
Literature	Ernst.J..et.al...2007..Reconstructing.dynamic.regulatory.maps..Mol.Syst.Biol.3...74	0.0370657922824481	"8/23"	"8/119"	39	R
Literature	Newcomb.LL..et.al...2003..Glucose.regulation.of.Saccharomyces.cerevisiae.cell.cycle.genes..Eukaryot.Cell.2.1..143.9	0.0370657922824481	"4/4"	"4/119"	39	R
Literature	Goranov.AI..et.al...2013..Changes.in.Cell.Morphology.Are.Coordinated.with.Cell.Growth.through.the.TORC1.Pathway..Curr.Biol.23.14..1269.79	0.0392628705312992	"11/47"	"11/119"	39	R
GO	integral component of membrane (GO.0016021)	8.20558079379651e-06	"59/582"	"59/133"	40	S
GO	membrane (GO.0016020)	0.000782867015539746	"68/820"	"68/133"	40	S
GO	fungal-type vacuole membrane (GO.0000329)	0.00481716706694738	"18/115"	"18/133"	40	S
GO	vacuole (GO.0005773)	0.00481716706694738	"18/114"	"18/133"	40	S
GO	L-tyrosine transmembrane transporter activity (GO.0005302)	0.00548123120530703	"4/5"	"4/133"	40	S
GO	vacuolar membrane (GO.0005774)	0.00548123120530703	"16/97"	"16/133"	40	S
GO	transport (GO.0006810)	0.00548123120530703	"40/423"	"40/133"	40	S
GO	single-stranded DNA-dependent ATP-dependent DNA helicase activity (GO.0017116)	0.00548123120530703	"4/5"	"4/133"	40	S
GO	MCM complex (GO.0042555)	0.00548123120530703	"4/5"	"4/133"	40	S
GO	tyrosine transport (GO.0015828)	0.014213629910354	"4/6"	"4/133"	40	S
GO	CMG complex (GO.0071162)	0.0289586073565957	"4/7"	"4/133"	40	S
GO	ubiquitin-protein transferase activity (GO.0004842)	0.04433237242613	"9/46"	"9/133"	40	S
GO	DNA strand elongation involved in DNA replication (GO.0006271)	0.04433237242613	"4/8"	"4/133"	40	S
GO	phosphatidylinositol binding (GO.0035091)	0.04433237242613	"6/20"	"6/133"	40	S
GO	endosome (GO.0005768)	0.0468205480395941	"11/67"	"11/133"	40	S
GO	stress-activated protein kinase signaling cascade (GO.0031098)	0.0357485249735285	"4/17"	"4/33"	45	T
GO	regulation of apoptotic process (GO.0042981)	0.0357485249735285	"4/15"	"4/33"	45	T
GO	cytoskeleton (GO.0005856)	3.81301502859213e-05	"15/87"	"15/80"	46	U
GO	spindle (GO.0005819)	0.0147085743326603	"6/20"	"6/80"	46	U
GO	kinetochore microtubule (GO.0005828)	0.0147085743326603	"3/3"	"3/80"	46	U
Literature	Moses.AM..et.al...2007..Clustering.of.phosphorylation.site.recognition.motifs.can.be.exploited.to.predict.the.targets.of.cyclin.dependent.kinase..Genome.Biol.8.2..R23	0.000152645140518807	"14/64"	"14/80"	46	U
Literature	Ubersax.JA..et.al...2003..Targets.of.the.cyclin.dependent.kinase.Cdk1..Nature.425.6960..859.64	0.000152645140518807	"21/159"	"21/80"	46	U
Literature	Winey.M.and.Byers.B..1993..Assembly.and.functions.of.the.spindle.pole.body.in.budding.yeast..Trends.Genet.9.9..300.4	0.0129303447991281	"5/7"	"5/80"	46	U
Literature	Miles.S.and.Breeden.L..2016..A.common.strategy.for.initiating.the.transition.from.proliferation.to.quiescence..Curr.Genet...	0.0201688214383968	"6/13"	"6/80"	46	U
GO	fungal-type vacuole (GO.0000324)	5.96398150138031e-07	"15/132"	"15/43"	52	V
GO	mannosylation (GO.0097502)	5.96398150138031e-07	"7/14"	"7/43"	52	V
GO	integral component of membrane (GO.0016021)	8.4624686815104e-07	"28/582"	"28/43"	52	V
GO	cell wall mannoprotein biosynthetic process (GO.0000032)	4.77548496618241e-06	"6/12"	"6/43"	52	V
GO	alpha-1,6-mannosyltransferase activity (GO.0000009)	1.45390483145925e-05	"4/4"	"4/43"	52	V
GO	alpha-1,6-mannosyltransferase complex (GO.0000136)	1.45390483145925e-05	"4/4"	"4/43"	52	V
GO	protein N-linked glycosylation (GO.0006487)	1.45390483145925e-05	"6/15"	"6/43"	52	V
GO	membrane (GO.0016020)	0.000960308495622297	"28/820"	"28/43"	52	V
GO	endoplasmic reticulum membrane (GO.0005789)	0.00266861647088868	"11/147"	"11/43"	52	V
GO	Golgi apparatus (GO.0005794)	0.00499312857682301	"10/130"	"10/43"	52	V
GO	protein peptidyl-prolyl isomerization (GO.0000413)	0.00588749381468252	"3/5"	"3/43"	52	V
GO	hydrolase activity (GO.0016787)	0.00595138343488691	"15/301"	"15/43"	52	V
GO	mannosyltransferase activity (GO.0000030)	0.00936040071909206	"4/15"	"4/43"	52	V
GO	extracellular region (GO.0005576)	0.00962772923627796	"6/47"	"6/43"	52	V
GO	endoplasmic reticulum (GO.0005783)	0.00962772923627796	"14/281"	"14/43"	52	V
GO	Golgi membrane (GO.0000139)	0.0109672239344413	"7/70"	"7/43"	52	V
GO	transferase activity, transferring glycosyl groups (GO.0016757)	0.0110835287157678	"5/31"	"5/43"	52	V
GO	peptidyl-prolyl cis-trans isomerase activity (GO.0003755)	0.0116570476581513	"3/7"	"3/43"	52	V
GO	GPI anchor biosynthetic process (GO.0006506)	0.0116570476581513	"3/7"	"3/43"	52	V
GO	peptidase activity (GO.0008233)	0.0176685813194165	"6/55"	"6/43"	52	V
GO	protein glycosylation (GO.0006486)	0.0285468569471866	"4/22"	"4/43"	52	V
GO	alpha-1,2-mannosyltransferase activity (GO.0000026)	0.0326353859741328	"3/10"	"3/43"	52	V
GO	proteolysis (GO.0006508)	0.0326353859741328	"6/63"	"6/43"	52	V
Literature	Orlean.P..2012..Architecture.and.Biosynthesis.of.the.Saccharomyces.cerevisiae.Cell.Wall..Genetics.192.3..775.818	5.44138906161098e-06	"14/93"	"14/43"	52	V
Literature	Piirainen.MA..et.al...2016..A.dual.approach.for.improving.homogeneity.of.a.human.type.N.glycan.structure.in.Saccharomyces.cerevisiae..Glycoconj.J.33.2..189.99	2.53974977327137e-05	"7/14"	"7/43"	52	V
Literature	Lesage.G.and.Bussey.H..2006..Cell.wall.assembly.in.Saccharomyces.cerevisiae..Microbiol.Mol.Biol.Rev.70.2..317.43	2.77744283391385e-05	"10/45"	"10/43"	52	V
Literature	Hashimoto.H.and.Yoda.K..1997..Novel.membrane.protein.complexes.for.protein.glycosylation.in.the.yeast.Golgi.apparatus..Biochem.Biophys.Res.Commun.241.3..682.6	0.00103689449096672	"4/4"	"4/43"	52	V
Literature	Wildt.S.and.Gerngross.TU..2005..The.humanization.of.N.glycosylation.pathways.in.yeast..Nat.Rev.Microbiol.3.2..119.28	0.00103689449096672	"4/4"	"4/43"	52	V
Literature	Delic.M..et.al...2013..The.secretory.pathway..exploring.yeast.diversity..FEMS.Microbiol.Rev.37.6..872.914	0.0128347688632174	"7/35"	"7/43"	52	V
Literature	Hirayama.S..et.al...2012..Yeast.mannan.structure.necessary.for.co.aggregation.with.Lactobacillus.plantarum.ML11.11..Biochem.Biophys.Res.Commun.419.4..652.5	0.0250018800936223	"4/7"	"4/43"	52	V
Literature	Jungmann.J.and.Munro.S..1998..Multi.protein.complexes.in.the.cis.Golgi.of.Saccharomyces.cerevisiae.with.alpha.1.6.mannosyltransferase.activity..EMBO.J.17.2..423.34	0.0281365640517532	"3/3"	"3/43"	52	V
Literature	Jungmann.J..et.al...1999..The.Saccharomyces.cerevisiae.protein.Mnn10p.Bed1p.is.a.subunit.of.a.Golgi.mannosyltransferase.complex..J.Biol.Chem.274.10..6579.85	0.0281365640517532	"3/3"	"3/43"	52	V
Literature	Kojima.H..et.al...1999..Interaction.among.the.subunits.of.Golgi.membrane.mannosyltransferase.complexes.of.the.yeast.Saccharomyces.cerevisiae..Biosci.Biotechnol.Biochem.63.11..1970.6	0.0281365640517532	"3/3"	"3/43"	52	V
Literature	Todorow.Z..et.al...2000..Active.recycling.of.yeast.Golgi.mannosyltransferase.complexes.through.the.endoplasmic.reticulum..Proc.Natl.Acad.Sci.U.S.A.97.25..13643.8	0.0281365640517532	"3/3"	"3/43"	52	V
Literature	Trivedi.D..et.al...2012..Genome.wide.analysis.of.Cyclophilin.gene.family.from.rice.and.Arabidopsis.and.its.comparison.with.yeast..Plant.Signal.Behav.7.12..1653.66	0.0281365640517532	"3/3"	"3/43"	52	V
Literature	Kellokumpu.S..et.al...2016..Glycosyltransferase.complexes.in.eukaryotes..long.known..prevalent.but.still.unrecognized..Cell.Mol.Life.Sci.73.2..305.25	0.0473115203246029	"4/9"	"4/43"	52	V
GO	mitochondrion (GO.0005739)	4.29085559183113e-87	"144/480"	"144/165"	53	W
GO	mitochondrial inner membrane (GO.0005743)	2.91598536922593e-50	"57/82"	"57/165"	53	W
GO	mitochondrial matrix (GO.0005759)	6.4261878809623e-28	"34/50"	"34/165"	53	W
GO	oxidation-reduction process (GO.0055114)	4.69130887063331e-16	"31/77"	"31/165"	53	W
GO	mitochondrial translation (GO.0032543)	3.14956884983165e-15	"22/38"	"22/165"	53	W
GO	oxidoreductase activity (GO.0016491)	2.46598731004902e-11	"24/64"	"24/165"	53	W
GO	translation (GO.0006412)	2.11007093486405e-10	"23/64"	"23/165"	53	W
GO	tricarboxylic acid cycle (GO.0006099)	2.61442647001775e-09	"9/9"	"9/165"	53	W
GO	mitochondrial genome maintenance (GO.0000002)	3.7832732682713e-09	"13/21"	"13/165"	53	W
GO	mitochondrial large ribosomal subunit (GO.0005762)	3.62034503344535e-07	"11/19"	"11/165"	53	W
GO	structural constituent of ribosome (GO.0003735)	1.79284324254478e-06	"13/31"	"13/165"	53	W
GO	mitochondrial nucleoid (GO.0042645)	4.03636682479465e-06	"8/11"	"8/165"	53	W
GO	mitochondrial electron transport, succinate to ubiquinone (GO.0006121)	7.17778086459671e-06	"6/6"	"6/165"	53	W
GO	mitochondrial respiratory chain complex II, succinate dehydrogenase complex (ubiquinone) (GO.0005749)	9.48784869832374e-05	"5/5"	"5/165"	53	W
GO	mitochondrial intermembrane space (GO.0005758)	9.48784869832374e-05	"8/15"	"8/165"	53	W
GO	oxidoreductase activity, acting on the CH-CH group of donors (GO.0016627)	9.48784869832374e-05	"5/5"	"5/165"	53	W
GO	electron carrier activity (GO.0009055)	0.000301701633734622	"8/17"	"8/165"	53	W
GO	pyridoxal phosphate binding (GO.0030170)	0.000480098833010668	"5/6"	"5/165"	53	W
GO	succinate dehydrogenase (ubiquinone) activity (GO.0008177)	0.00116918582717232	"4/4"	"4/165"	53	W
GO	isoleucine biosynthetic process (GO.0009097)	0.00116918582717232	"4/4"	"4/165"	53	W
GO	cellular respiration (GO.0045333)	0.00116918582717232	"4/4"	"4/165"	53	W
GO	ubiquinone biosynthetic process (GO.0006744)	0.00124777437295911	"5/7"	"5/165"	53	W
GO	integral component of mitochondrial inner membrane (GO.0031305)	0.00124777437295911	"5/7"	"5/165"	53	W
GO	aminoacyl-tRNA ligase activity (GO.0004812)	0.00137322353313059	"6/11"	"6/165"	53	W
GO	catalytic activity (GO.0003824)	0.00163675564776401	"15/72"	"15/165"	53	W
GO	ribosome (GO.0005840)	0.00163675564776401	"15/72"	"15/165"	53	W
GO	protein import into mitochondrial matrix (GO.0030150)	0.00231395894148712	"6/12"	"6/165"	53	W
GO	iron-sulfur cluster assembly (GO.0016226)	0.0025041266958073	"5/8"	"5/165"	53	W
GO	extrinsic component of mitochondrial inner membrane (GO.0031314)	0.0025041266958073	"5/8"	"5/165"	53	W
GO	intracellular ribonucleoprotein complex (GO.0030529)	0.00286611699574169	"16/85"	"16/165"	53	W
GO	NADH oxidation (GO.0006116)	0.00343212613782842	"4/5"	"4/165"	53	W
GO	mitochondrial proton-transporting ATP synthase complex assembly (GO.0033615)	0.00343212613782842	"4/5"	"4/165"	53	W
GO	positive regulation of mitochondrial translation (GO.0070131)	0.00343212613782842	"4/5"	"4/165"	53	W
GO	respiratory chain (GO.0070469)	0.00343212613782842	"4/5"	"4/165"	53	W
GO	mitochondrion organization (GO.0007005)	0.0035631182492864	"9/31"	"9/165"	53	W
GO	metalloendopeptidase activity (GO.0004222)	0.00430710435078619	"5/9"	"5/165"	53	W
GO	tRNA aminoacylation for protein translation (GO.0006418)	0.00795421108584873	"5/10"	"5/165"	53	W
GO	branched-chain amino acid biosynthetic process (GO.0009082)	0.00875771863342407	"4/6"	"4/165"	53	W
GO	heme biosynthetic process (GO.0006783)	0.009181784478246	"3/3"	"3/165"	53	W
GO	valine biosynthetic process (GO.0009099)	0.009181784478246	"3/3"	"3/165"	53	W
GO	mitochondrial respiratory chain complex IV assembly (GO.0033617)	0.009181784478246	"3/3"	"3/165"	53	W
GO	proton-transporting ATP synthase activity, rotational mechanism (GO.0046933)	0.009181784478246	"3/3"	"3/165"	53	W
GO	mitochondrial respiratory chain complex IV biogenesis (GO.0097034)	0.009181784478246	"3/3"	"3/165"	53	W
GO	2 iron, 2 sulfur cluster binding (GO.0051537)	0.0116385495756241	"5/11"	"5/165"	53	W
GO	membrane (GO.0016020)	0.015758144036652	"72/820"	"72/165"	53	W
GO	integral component of mitochondrial membrane (GO.0032592)	0.0160489703925983	"4/7"	"4/165"	53	W
GO	intracellular (GO.0005622)	0.0251432794165153	"10/49"	"10/165"	53	W
GO	mitochondrial ribosome (GO.0005761)	0.0313668379822179	"3/4"	"3/165"	53	W
GO	ligase activity (GO.0016874)	0.0463442552127039	"6/21"	"6/165"	53	W
Literature	Reinders.J..et.al...2006..Toward.the.complete.yeast.mitochondrial.proteome..multidimensional.separation.techniques.for.mitochondrial.proteomics..J.Proteome.Res.5.7..1543.54	2.47226553508244e-67	"121/377"	"121/165"	53	W
Literature	Sickmann.A..et.al...2003..The.proteome.of.Saccharomyces.cerevisiae.mitochondria..Proc.Natl.Acad.Sci.U.S.A.100.23..13207.12	2.09324805069201e-57	"110/350"	"110/165"	53	W
Literature	Szklarczyk.R.and.Huynen.MA..2009..Expansion.of.the.human.mitochondrial.proteome.by.intra..and.inter.compartmental.protein.duplication..Genome.Biol.10.11..R135	2.94127822504886e-41	"55/92"	"55/165"	53	W
Literature	Karlberg.O..et.al...2000..The.dual.origin.of.the.yeast.mitochondrial.proteome..Yeast.17.3..170.87	6.72929328451458e-33	"50/96"	"50/165"	53	W
Literature	Dimmer.KS..et.al...2002..Genetic.basis.of.mitochondrial.function.and.morphology.in.Saccharomyces.cerevisiae..Mol.Biol.Cell.13.3..847.53	1.92517146186094e-28	"60/172"	"60/165"	53	W
Literature	Lasserre.JP..et.al...2015..Yeast.as.a.system.for.modeling.mitochondrial.disease.mechanisms.and.discovering.therapies..Dis.Model.Mech.8.6..509.26	9.83655047283708e-25	"32/47"	"32/165"	53	W
Literature	Venne.AS..et.al...2013..Novel.highly.sensitive..specific..and.straightforward.strategy.for.comprehensive.N.terminal.proteomics.reveals.unknown.substrates.of.the.mitochondrial.peptidase.icp55..J.Proteome.Res.12.9..3823.30	1.035466234928e-13	"17/21"	"17/165"	53	W
Literature	Garcia.M..et.al...2007..Mitochondria.associated.Yeast.mRNAs.and.the.Biogenesis.of.Molecular.Complexes..Mol.Biol.Cell.18.2..362.8	1.04274470962285e-13	"18/24"	"18/165"	53	W
Literature	Fox.TD..2012..Mitochondrial.protein.synthesis..import..and.assembly..Genetics.192.4..1203.34	3.4132679313341e-13	"23/44"	"23/165"	53	W
Literature	Banci.L..et.al...2011..Copper.exposure.effects.on.yeast.mitochondrial.proteome..J.Proteomics.74.11..2522.35	4.36768586157375e-11	"16/23"	"16/165"	53	W
Literature	Vogtle.FN..et.al...2009..Global.analysis.of.the.mitochondrial.N.proteome.identifies.a.processing.peptidase.critical.for.protein.stability..Cell.139.2..428.39	4.77046436004606e-10	"15/22"	"15/165"	53	W
Literature	Vilella.F..et.al...2004..Evolution.and.cellular.function.of.monothiol.glutaredoxins..involvement.in.iron.sulphur.cluster.assembly..Comp.Funct.Genomics.5.4..328.41	5.2616407720826e-10	"13/16"	"13/165"	53	W
Literature	Herrmann.JM..et.al...2013..Control.of.protein.synthesis.in.yeast.mitochondria..The.concept.of.translational.activators..Biochim.Biophys.Acta.1833.2..286.94	1.31629539354972e-09	"12/14"	"12/165"	53	W
Literature	Towpik.J..2005..Regulation.of.mitochondrial.translation.in.yeast..Cell.Mol.Biol.Lett.10.4..571.94	1.31629539354972e-09	"17/31"	"17/165"	53	W
Literature	Gubbens.J..et.al...2009..Photocrosslinking.and.click.chemistry.enable.the.specific.detection.of.proteins.interacting.with.phospholipids.at.the.membrane.interface..Chem.Biol.16.1..3.14	1.6916381030925e-09	"13/17"	"13/165"	53	W
Literature	Choi.JS..et.al...2011..Caloric.restriction.improves.efficiency.and.capacity.of.the.mitochondrial.electron.transport.chain.in.Saccharomyces.cerevisiae..Biochem.Biophys.Res.Commun.409.2..308.14	2.54687192279991e-09	"11/12"	"11/165"	53	W
Literature	Grandier.Vazeille.X..et.al...2001..Yeast.mitochondrial.dehydrogenases.are.associated.in.a.supramolecular.complex..Biochemistry.40.33..9758.69	2.54687192279991e-09	"11/12"	"11/165"	53	W
Literature	Rea.SL..et.al...2010..Bacteria..yeast..worms..and.flies..exploiting.simple.model.organisms.to.investigate.human.mitochondrial.diseases..Dev.Disabil.Res.Rev.16.2..200.18	4.83562372674009e-09	"12/15"	"12/165"	53	W
Literature	Goldberg.AA..et.al...2009..Effect.of.calorie.restriction.on.the.metabolic.history.of.chronologically.aging.yeast..Exp.Gerontol.44.9..555.71	1.3285895970092e-08	"17/35"	"17/165"	53	W
Literature	Smits.P..et.al...2007..Reconstructing.the.evolution.of.the.mitochondrial.ribosomal.proteome..Nucleic.Acids.Res.35.14..4686.703	2.02306062542603e-08	"15/27"	"15/165"	53	W
Literature	Branda.SS.and.Isaya.G..1995..Prediction.and.identification.of.new.natural.substrates.of.the.yeast.mitochondrial.intermediate.peptidase..J.Biol.Chem.270.45..27366.73	2.89269214923231e-08	"10/11"	"10/165"	53	W
Literature	Bulteau.AL..et.al...2012..Changes.in.mitochondrial.glutathione.levels.and.protein.thiol.oxidation.in..yfh1.yeast.cells.and.the.lymphoblasts.of.patients.with.Friedreich.s.ataxia..Biochim.Biophys.Acta.1822.2..212.25	2.89269214923231e-08	"10/11"	"10/165"	53	W
Literature	Renvoise.M..et.al...2014..Quantitative.variations.of.the.mitochondrial.proteome.and.phosphoproteome.during.fermentative.and.respiratory.growth.in.Saccharomyces.cerevisiae..J.Proteomics.106...140.50	2.89269214923231e-08	"16/32"	"16/165"	53	W
Literature	Marc.P..et.al...2002..Genome.wide.analysis.of.mRNAs.targeted.to.yeast.mitochondria..EMBO.Rep.3.2..159.64	2.9116430727019e-08	"13/20"	"13/165"	53	W
Literature	Hess.DC..et.al...2009..Computationally.driven..quantitative.experiments.discover.genes.required.for.mitochondrial.biogenesis..PLoS.Genet.5.3..e1000407	3.5040241992418e-08	"14/24"	"14/165"	53	W
Literature	Achcar.F..et.al...2011..A.Boolean.probabilistic.model.of.metabolic.adaptation.to.oxygen.in.relation.to.iron.homeostasis.and.oxidative.stress..BMC.Syst.Biol.5.1..51	4.19445670887953e-08	"19/48"	"19/165"	53	W
Literature	Greiner.P..et.al...2008..Biogenesis.of.cytochrome.c.oxidase...in.vitro.approaches.to.study.cofactor.insertion.into.a.bacterial.subunit.I..Biochim.Biophys.Acta.1777.7.8..904.911	4.19445670887953e-08	"11/14"	"11/165"	53	W
Literature	Ye.X..et.al...2015..Evaluation.of.genes.involved.in.oxidative.phosphorylation.in.yeast.by.developing.a.simple.and.rapid.method.to.measure.mitochondrial.ATP.synthetic.activity..Microb.Cell.Fact.14...56	4.19445670887953e-08	"11/14"	"11/165"	53	W
Literature	Kaniak.Golik.A.and.Skoneczna.A..2015..Mitochondria.nucleus.network.for.genome.stability..Free.Radic.Biol.Med.82...73.104	9.45963118561162e-08	"24/81"	"24/165"	53	W
Literature	Fujita.K..et.al...2001..Cross.genomic.analysis.of.the.translational.systems.of.various.organisms..J.Ind.Microbiol.Biotechnol.27.3..163.9	1.00087336755634e-07	"12/18"	"12/165"	53	W
Literature	Bender.T..et.al...2010..The.role.of.protein.quality.control.in.mitochondrial.protein.homeostasis.under.oxidative.stress..Proteomics.10.7..1426.43	1.21788098467826e-07	"10/12"	"10/165"	53	W
Literature	Douette.P..et.al...2006..Uncoupling.protein.1.affects.the.yeast.mitoproteome.and.oxygen.free.radical.production..Free.Radic.Biol.Med.40.2..303.15	3.0542503229571e-07	"9/10"	"9/165"	53	W
Literature	Gonzalez.Cabo.P..et.al...2010..Flavin.adenine.dinucleotide.rescues.the.phenotype.of.frataxin.deficiency..PLoS.One.5.1..e8872	3.0542503229571e-07	"9/10"	"9/165"	53	W
Literature	Kehrein.K..et.al...2013..Mitochondrial.protein.synthesis..efficiency.and.accuracy..Antioxid.Redox.Signal.19.16..1928.39	3.6008917543197e-07	"11/16"	"11/165"	53	W
Literature	Sharma.PK..et.al...2011..Calorie.restriction.up.regulates.iron.and.copper.transport.genes.in.Saccharomyces.cerevisiae..Mol.Biosyst.7.2..394.402	3.6008917543197e-07	"11/16"	"11/165"	53	W
Literature	Stuart.RA..2008..Supercomplex.organization.of.the.oxidative.phosphorylation.enzymes.in.yeast.mitochondria..J.Bioenerg.Biomembr.40.5..411.7	4.29808157802151e-07	"10/13"	"10/165"	53	W
Literature	Couplan.E..et.al...2011..A.yeast.based.assay.identifies.drugs.active.against.human.mitochondrial.disorders..Proc.Natl.Acad.Sci.U.S.A.108.29..11989.94	4.64330348020519e-07	"8/8"	"8/165"	53	W
Literature	Vogtle.FN..et.al...2011..Mitochondrial.protein.turnover..role.of.the.precursor.intermediate.peptidase.Oct1.in.protein.stabilization..Mol.Biol.Cell.22.13..2135.43	4.64330348020519e-07	"8/8"	"8/165"	53	W
Literature	Rutter.J.and.Hughes.AL..2015..Power.2...the.power.of.yeast.genetics.applied.to.the.powerhouse.of.the.cell..Trends.Endocrinol.Metab.26.2..59.68	8.65854734243732e-07	"11/17"	"11/165"	53	W
Literature	Bayot.A..et.al...2010..Identification.of.novel.oxidized.protein.substrates.and.physiological.partners.of.the.mitochondrial.ATP.dependent.Lon.like.protease.Pim1..J.Biol.Chem.285.15..11445.57	1.24858826160039e-06	"9/11"	"9/165"	53	W
Literature	Soto.IC..et.al...2012..Biogenesis.and.assembly.of.eukaryotic.cytochrome.c.oxidase.catalytic.core..Biochim.Biophys.Acta.1817.6..883.97	1.24858826160039e-06	"9/11"	"9/165"	53	W
Literature	Stiburek.L.and.Zeman.J..2010..Assembly.factors.and.ATP.dependent.proteases.in.cytochrome.c.oxidase.biogenesis..Biochim.Biophys.Acta.1797.6.7..1149.58	1.24858826160039e-06	"9/11"	"9/165"	53	W
Literature	Helbig.AO..et.al...2009..A.three.way.proteomics.strategy.allows.differential.analysis.of.yeast.mitochondrial.membrane.protein.complexes.under.anaerobic.and.aerobic.conditions..Proteomics.9.20..4787.98	1.90048183638241e-06	"11/18"	"11/165"	53	W
Literature	Steinmetz.LM..et.al...2002..Systematic.screen.for.human.disease.genes.in.yeast..Nat.Genet.31.4..400.4	1.90048183638241e-06	"12/22"	"12/165"	53	W
Literature	Pfeffer.S..et.al...2015..Organization.of.the.mitochondrial.translation.machinery.studied.in.situ.by.cryoelectron.tomography..Nat.Commun.6...6019	2.71587403271117e-06	"13/27"	"13/165"	53	W
Literature	Chen.YC..et.al...2012..Identification.of.a.protein.mediating.respiratory.supercomplex.stability..Cell.Metab.15.3..348.60	2.83542080268158e-06	"8/9"	"8/165"	53	W
Literature	Claypool.SM..et.al...2008..Cardiolipin.defines.the.interactome.of.the.major.ADP.ATP.carrier.protein.of.the.mitochondrial.inner.membrane..J.Cell.Biol.182.5..937.50	2.83542080268158e-06	"8/9"	"8/165"	53	W
Literature	Gomes.F..et.al...2013..nde1.deletion.improves.mitochondrial.DNA.maintenance.in.Saccharomyces.cerevisiae.coenzyme.Q.mutants..Biochem.J.449.3..595.603	2.83542080268158e-06	"8/9"	"8/165"	53	W
Literature	Graack.HR.and.Wittmann.Liebold.B..1998..Mitochondrial.ribosomal.proteins..MRPs..of.yeast..Biochem.J.329...Pt.3....433.48	2.83542080268158e-06	"10/15"	"10/165"	53	W
Literature	Joseph.Horne.T..et.al...2001..Fungal.respiration..a.fusion.of.standard.and.alternative.components..Biochim.Biophys.Acta.1504.2.3..179.95	2.83542080268158e-06	"8/9"	"8/165"	53	W
Literature	Kwon.YY..et.al...2015..Mitochondrial.Efficiency.Dependent.Viability.of.Saccharomyces.cerevisiae.Mutants.Carrying.Individual.Electron.Transport.Chain.Component.Deletions..Mol.Cells.38.12..1054.63	2.83542080268158e-06	"8/9"	"8/165"	53	W
Literature	Lemaire.C.and.Dujardin.G..2008..Preparation.of.Respiratory.Chain.Complexes.from.Saccharomyces.cerevisiae.Wild.Type.and.Mutant.Mitochondria..Activity.Measurement.and.Subunit.Composition.Analysis..Methods.Mol.Biol.432.65.81	2.83542080268158e-06	"8/9"	"8/165"	53	W
Literature	Zee.JM.and.Glerum.DM..2006..Defects.in.cytochrome.oxidase.assembly.in.humans..lessons.from.yeast..Biochem.Cell.Biol.84.6..859.69	2.83542080268158e-06	"8/9"	"8/165"	53	W
Literature	De.Silva.D..et.al...2015..Mitochondrial.ribosome.assembly.in.health.and.disease..Cell.Cycle.14.14..2226.50	4.09385419573186e-06	"14/33"	"14/165"	53	W
Literature	Tu.BP..et.al...2005..Logic.of.the.yeast.metabolic.cycle..temporal.compartmentalization.of.cellular.processes..Science.310.5751..1152.8	6.12721850307203e-06	"17/51"	"17/165"	53	W
Literature	Amunts.A..et.al...2014..Structure.of.the.yeast.mitochondrial.large.ribosomal.subunit..Science.343.6178..1485.9	6.54535911944251e-06	"10/16"	"10/165"	53	W
Literature	Bourges.I..et.al...2009..Multiple.defects.in.the.respiratory.chain.lead.to.the.repression.of.genes.encoding.components.of.the.respiratory.chain.and.TCA.cycle.enzymes..J.Mol.Biol.387.5..1081.91	6.68219471475482e-06	"11/20"	"11/165"	53	W
Literature	Miyakawa.I..et.al...2009..Mitochondrial.nucleoids.from.the.yeast.Candida.parapsilosis..expansion.of.the.repertoire.of.proteins.associated.with.mitochondrial.DNA..Microbiology.155.Pt.5..1558.68	6.68219471475482e-06	"11/20"	"11/165"	53	W
Literature	Bender.T..et.al...2011..Mitochondrial.enzymes.are.protected.from.stress.induced.aggregation.by.mitochondrial.chaperones.and.the.Pim1.LON.protease..Mol.Biol.Cell.22.5..541.54	1.18511734741264e-05	"8/10"	"8/165"	53	W
Literature	Herrmann.JM.and.Funes.S..2005..Biogenesis.of.cytochrome.oxidase.sophisticated.assembly.lines.in.the.mitochondrial.inner.membrane..Gene.354...43.52	1.18511734741264e-05	"8/10"	"8/165"	53	W
Literature	Roberts.Iii.GG.and.Hudson.AP..2009..Rsf1p.is.required.for.an.efficient.metabolic.shift.from.fermentative.to.glycerol.based.respiratory.growth.in.S..cerevisiae..Yeast.26.2..95.110	1.35629322673875e-05	"20/74"	"20/165"	53	W
Literature	Belghazi.M..et.al...2001..Analysis.of.protein.sequences.and.protein.complexes.by.matrix.assisted.laser.desorption.ionization.mass.spectrometry..Proteomics.1.8..946.54	1.35794897127977e-05	"10/17"	"10/165"	53	W
Literature	Zahedi.RP..et.al...2006..Proteomic.analysis.of.the.yeast.mitochondrial.outer.membrane.reveals.accumulation.of.a.subclass.of.preproteins..Mol.Biol.Cell.17.3..1436.50	1.57635391156898e-05	"15/42"	"15/165"	53	W
Literature	Braun.RJ..et.al...2011..Neurotoxic.43.kDa.TAR.DNA.binding.protein..TDP.43..triggers.mitochondrion.dependent.programmed.cell.death.in.yeast..J.Biol.Chem.286.22..19958.72	2.48630231026996e-05	"9/14"	"9/165"	53	W
Literature	Meier.S..et.al...2005..Proline.residues.of.transmembrane.domains.determine.the.sorting.of.inner.membrane.proteins.in.mitochondria..J.Cell.Biol.170.6..881.8	2.48630231026996e-05	"9/14"	"9/165"	53	W
Literature	Bestwick.M..et.al...2010..The.role.of.coa2.in.hemylation.of.yeast.cox1.revealed.by.its.genetic.interaction.with.cox10..Mol.Cell.Biol.30.1..172.85	3.14315540356791e-05	"7/8"	"7/165"	53	W
Literature	Jones.RC.and.Hough.JS..1970..The.effect.of.temperature.on.the.metabolism.of.baker.s.yeast.growing.on.continuous.culture..J.Gen.Microbiol.60.1..107.16	3.14315540356791e-05	"7/8"	"7/165"	53	W
Literature	Mileykovskaya.E..et.al...2005..Cardiolipin.in.energy.transducing.membranes..Biochemistry..Mosc..70.2..154.8	3.14315540356791e-05	"7/8"	"7/165"	53	W
Literature	Wittig.I.and.Schagger.H..2008..Structural.organization.of.mitochondrial.ATP.synthase..Biochim.Biophys.Acta.1777.7.8..592.8	3.14315540356791e-05	"7/8"	"7/165"	53	W
Literature	Zhu.QS.and.Beattie.DS..1988..Direct.interaction.between.yeast.NADH.ubiquinone.oxidoreductase..succinate.ubiquinone.oxidoreductase..and.ubiquinol.cytochrome.c.oxidoreductase.in.the.reduction.of.exogenous.quinones..J.Biol.Chem.263.1..193.9	3.14315540356791e-05	"7/8"	"7/165"	53	W
Literature	Barrientos.A..et.al...2002..Cytochrome.oxidase.in.health.and.disease..Gene.286.1..53.63	3.47523419578674e-05	"8/11"	"8/165"	53	W
Literature	Merz.S.and.Westermann.B..2009..Genome.wide.deletion.mutant.analysis.reveals.genes.required.for.respiratory.growth..mitochondrial.genome.maintenance.and.mitochondrial.protein.synthesis.in.Saccharomyces.cerevisiae..Genome.Biol.10.9..R95	3.90611054684146e-05	"12/28"	"12/165"	53	W
Literature	Nosek.J..et.al...2006..Mitochondrial.chromosome.structure..an.insight.from.analysis.of.complete.yeast.genomes..FEMS.Yeast.Res.6.3..356.70	4.90075586798593e-05	"10/19"	"10/165"	53	W
Literature	Arnold.I..et.al...2006..Evidence.for.a.novel.mitochondria.to.nucleus.signalling.pathway.in.respiring.cells.lacking.i.AAA.protease.and.the.ABC.transporter.Mdl1..Gene.367.74.88	5.79682576362816e-05	"6/6"	"6/165"	53	W
Literature	Bradshaw.PC.and.Pfeiffer.DR..2006..Release.of.Ca2..and.Mg2..from.yeast.mitochondria.is.stimulated.by.increased.ionic.strength..BMC.Biochem.7...4	5.79682576362816e-05	"6/6"	"6/165"	53	W
Literature	Braun.RJ..et.al...2009..16.BAC.SDS.PAGE.Analysis.of.Membrane.Proteins.of.Yeast.Mitochondria.Purified.by.Free.Flow.Electrophoresis..Methods.Mol.Biol.528.83.107	5.79682576362816e-05	"6/6"	"6/165"	53	W
Literature	Buzhynskyy.N..et.al...2007..Rows.of.ATP.synthase.dimers.in.native.mitochondrial.inner.membranes..Biophys.J.93.8..2870.6	5.79682576362816e-05	"6/6"	"6/165"	53	W
Literature	de.Groot.MJ..et.al...2007..Quantitative.proteomics.and.transcriptomics.of.anaerobic.and.aerobic.yeast.cultures.reveals.post.transcriptional.regulation.of.key.cellular.processes..Microbiology.153.Pt.11..3864.3878	5.79682576362816e-05	"11/24"	"11/165"	53	W
Literature	Irazusta.V..et.al...2010..Yeast.frataxin.mutants.display.decreased.superoxide.dismutase.activity.crucial.to.promote.protein.oxidative.damage..Free.Radic.Biol.Med.48.3..411.420	5.79682576362816e-05	"6/6"	"6/165"	53	W
Literature	Keil.M..et.al...2012..Oxa1.ribosome.complexes.coordinate.the.assembly.of.cytochrome.C.oxidase.in.mitochondria..J.Biol.Chem.287.41..34484.93	5.79682576362816e-05	"6/6"	"6/165"	53	W
Literature	Kolkman.A..et.al...2005..Comparative.proteome.analysis.of.Saccharomyces.cerevisiae.grown.in.chemostat.cultures.limited.for.glucose.or.ethanol..Mol.Cell.Proteomics.4.1..1.11	5.79682576362816e-05	"6/6"	"6/165"	53	W
Literature	Mayorga.JP..et.al...2016..A.Novel.Function.of.Pet54.in.Regulation.of.Cox1.Synthesis.in.Saccharomyces.cerevisiae.Mitochondria..J.Biol.Chem.291.17..9343.55	5.79682576362816e-05	"6/6"	"6/165"	53	W
Literature	Osman.C..et.al...2009..The.genetic.interactome.of.prohibitins..coordinated.control.of.cardiolipin.and.phosphatidylethanolamine.by.conserved.regulators.in.mitochondria..J.Cell.Biol.184.4..583.96	8.15365816120926e-05	"10/20"	"10/165"	53	W
Literature	Martinez.Pastor.M..et.al...2010..Adaptive.changes.of.the.yeast.mitochondrial.proteome.in.response.to.salt.stress..OMICS.14.5..541.52	8.33973305647978e-05	"8/12"	"8/165"	53	W
Literature	Wiebe.MG..et.al...2008..Central.carbon.metabolism.of.Saccharomyces.cerevisiae.in.anaerobic..oxygen.limited.and.fully.aerobic.steady.state.conditions.and.following.a.shift.to.anaerobic.conditions..FEMS.Yeast.Res.8.1..140.54	9.72388088361669e-05	"9/16"	"9/165"	53	W
Literature	Vukotic.M..et.al...2012..Rcf1.mediates.cytochrome.oxidase.assembly.and.respirasome.formation..revealing.heterogeneity.of.the.enzyme.complex..Cell.Metab.15.3..336.47	0.000109011267003971	"7/9"	"7/165"	53	W
Literature	Lafontaine.DL.and.Tollervey.D..2001..The.function.and.synthesis.of.ribosomes..Nat.Rev.Mol.Cell.Biol.2.7..514.20	0.00012679293617993	"12/31"	"12/165"	53	W
Literature	Blackman.RK..et.al...2012..Mitochondrial.electron.transport.is.the.cellular.target.of.the.oncology.drug.elesclomol..PLoS.One.7.1..e29798	0.000240800879348958	"10/22"	"10/165"	53	W
Literature	Murray.DB..et.al...2011..Redox.regulation.in.respiring.Saccharomyces.cerevisiae..Biochim.Biophys.Acta.1810.10..945.58	0.000258599948742077	"14/45"	"14/165"	53	W
Literature	Yadav.V..et.al...2011..Chlorophenol.stress.affects.aromatic.amino.acid.biosynthesis.a.genome.wide.study..Yeast.28.1..81.91	0.000275557694081468	"12/33"	"12/165"	53	W
Literature	Baile.MG.and.Claypool.SM..2013..The.power.of.yeast.to.model.diseases.of.the.powerhouse.of.the.cell..Front.Biosci.18...241.78	0.000318179916717854	"7/10"	"7/165"	53	W
Literature	Kumar.A..et.al...2011..Converging.evidence.of.mitochondrial.dysfunction.in.a.yeast.model.of.homocysteine.metabolism.imbalance..J.Biol.Chem.286.24..21779.95	0.000318179916717854	"7/10"	"7/165"	53	W
Literature	Ohlmeier.S..et.al...2010..Protein.phosphorylation.in.mitochondria...A.study.on.fermentative.and.respiratory.growth.of.Saccharomyces.cerevisiae..Electrophoresis.31.17..2869.81	0.000318179916717854	"7/10"	"7/165"	53	W
Literature	Gadir.N..et.al...2011..Localization.of.mRNAs.coding.for.mitochondrial.proteins.in.the.yeast.Saccharomyces.cerevisiae..RNA.17.8..1551.65	0.000318494842342652	"9/18"	"9/165"	53	W
Literature	Gamberi.T..et.al...2015..Evidence.that.the.antiproliferative.effects.of.auranofin.in.Saccharomyces.cerevisiae.arise.from.inhibition.of.mitochondrial.respiration..Int.J.Biochem.Cell.Biol.65...61.71	0.000318494842342652	"6/7"	"6/165"	53	W
Literature	Habib.SJ..et.al...2007..Analysis.and.prediction.of.mitochondrial.targeting.signals..Methods.Cell.Biol.80.761.81	0.000318494842342652	"9/18"	"9/165"	53	W
Literature	Khalimonchuk.O..et.al...2012..Selective.Oma1.protease.mediated.proteolysis.of.Cox1.subunit.of.cytochrome.oxidase.in.assembly.mutants..J.Biol.Chem.287.10..7289.300	0.000318494842342652	"6/7"	"6/165"	53	W
Literature	Tzagoloff.A..1969..Assembly.of.the.mitochondrial.membrane.system..I..Characterization.of.some.enzymes.of.the.inner.membrane.of.yeast.mitochondria..J.Biol.Chem.244.18..5020.6	0.000318494842342652	"6/7"	"6/165"	53	W
Literature	Zickermann.V..et.al...2010..Small.single.transmembrane.domain..STMD..proteins.organize.the.hydrophobic.subunits.of.large.membrane.protein.complexes..FEBS.Lett.584.12..2516.25	0.000318494842342652	"6/7"	"6/165"	53	W
Literature	Vemuri.GN..et.al...2007..Increasing.NADH.oxidation.reduces.overflow.metabolism.in.Saccharomyces.cerevisiae..Proc.Natl.Acad.Sci.U.S.A.104.7..2402.7	0.00037689863054493	"8/14"	"8/165"	53	W
Literature	Yoshida.S.and.Yokoyama.A..2012..Identification.and.characterization.of.genes.related.to.the.production.of.organic.acids.in.yeast..J.Biosci.Bioeng.113.5..556.61	0.00037689863054493	"8/14"	"8/165"	53	W
Literature	Moreno.Garcia.J..et.al...2015..Proteins.involved.in.flor.yeast.carbon.metabolism.under.biofilm.formation.conditions..Food.Microbiol.46...25.33	0.000473515900640587	"11/29"	"11/165"	53	W
Literature	Puig.S..et.al...2005..Coordinated.remodeling.of.cellular.metabolism.during.iron.deficiency.through.targeted.mRNA.degradation..Cell.120.1..99.110	0.000548728399508749	"9/19"	"9/165"	53	W
Literature	Murcha.MW..et.al...2015..MPIC..A.Mitochondrial.Protein.Import.Components.Database.for.Plant.and.Non.Plant.Species..Plant.Cell.Physiol.56.1..e10	0.000552885310615079	"10/24"	"10/165"	53	W
Literature	BARRON.ES..et.al...1950..Regulatory.mechanisms.of.cellular.respiration..III..Enzyme.distribution.in.the.cell..Its.influence.on.the.metabolism.of.pyruvic.acid.by.bakers..yeast..J.Gen.Physiol.34.2..211.24	0.000678349381547904	"5/5"	"5/165"	53	W
Literature	Bestwick.M..et.al...2010..Analysis.of.Leigh.Syndrome.Mutations.in.the.Yeast.SURF1.Homolog.Reveals.a.New.Member.of.the.Cytochrome.Oxidase.Assembly.Factor.Family..Mol.Cell.Biol.30.18..4480.91	0.000678349381547904	"5/5"	"5/165"	53	W
Literature	Conant.GC.and.Wolfe.KH..2007..Increased.glycolytic.flux.as.an.outcome.of.whole.genome.duplication.in.yeast..Mol.Syst.Biol.3.129	0.000678349381547904	"5/5"	"5/165"	53	W
Literature	Fox.TD..1996..Genetic.strategies.for.identification.of.mitochondrial.translation.factors.in.Saccharomyces.cerevisiae..Methods.Enzymol.264.228.37	0.000678349381547904	"5/5"	"5/165"	53	W
Literature	Paul.VD.and.Lill.R..2014..SnapShot..Eukaryotic.Fe.S.Protein.Biogenesis..Cell.Metab.20.2..384.384.e1	0.000678349381547904	"8/15"	"8/165"	53	W
Literature	Pierrel.F..et.al...2007..Coa1.links.the.Mss51.post.translational.function.to.Cox1.cofactor.insertion.in.cytochrome.c.oxidase.assembly..EMBO.J.26.20..4335.46	0.000678349381547904	"5/5"	"5/165"	53	W
Literature	Pierrel.F..et.al...2008..Coa2.is.an.assembly.factor.for.yeast.cytochrome.c.oxidase.biogenesis.that.facilitates.the.maturation.of.Cox1..Mol.Cell.Biol.28.16..4927.39	0.000678349381547904	"5/5"	"5/165"	53	W
Literature	Przybyla.Zawislak.B..et.al...1999..Genetic.and.biochemical.interactions.involving.tricarboxylic.acid.cycle..TCA..function.using.a.collection.of.mutants.defective.in.all.TCA.cycle.genes..Genetics.152.1..153.66	0.000678349381547904	"5/5"	"5/165"	53	W
Literature	Rinaldi.T..et.al...2010..Mitochondrial.diseases.and.the.role.of.the.yeast.models..FEMS.Yeast.Res.10.8..1006.22	0.000678349381547904	"7/11"	"7/165"	53	W
Literature	Tauche.A..et.al...2008..Ubiquinone.biosynthesis.in.Saccharomyces.cerevisiae..the.molecular.organization.of.O.methylase.Coq3p.depends.on.Abc1p.Coq8p..FEMS.Yeast.Res.8.8..1263.75	0.000678349381547904	"5/5"	"5/165"	53	W
Literature	Zhang.W..et.al...2003..Microarray.analyses.of.the.metabolic.responses.of.Saccharomyces.cerevisiae.to.organic.solvent.dimethyl.sulfoxide..J.Ind.Microbiol.Biotechnol.30.1..57.69	0.000900273536306732	"12/37"	"12/165"	53	W
Literature	Mileykovskaya.E.and.Dowhan.W..2014..Cardiolipin.dependent.formation.of.mitochondrial.respiratory.supercomplexes..Chem.Phys.Lipids.179...42.8	0.000996027760168312	"6/8"	"6/165"	53	W
Literature	Richard.VR..et.al...2013..Macromitophagy.is.a.longevity.assurance.process.that.in.chronologically.aging.yeast.limited.in.calorie.supply.sustains.functional.mitochondria.and.maintains.cellular.lipid.homeostasis..Aging..Albany.NY..5.4..234.69	0.000996027760168312	"6/8"	"6/165"	53	W
Literature	Tamura.Y..et.al...2006..Identification.of.Tam41.maintaining.integrity.of.the.TIM23.protein.translocator.complex.in.mitochondria..J.Cell.Biol.174.5..631.7	0.000996027760168312	"6/8"	"6/165"	53	W
Literature	Wittig.I.and.Schagger.H..2009..Supramolecular.organization.of.ATP.synthase.and.respiratory.chain.in.mitochondrial.membranes..Biochim.Biophys.Acta.1787.6..672.80	0.000996027760168312	"6/8"	"6/165"	53	W
Literature	Wurm.CA.and.Jakobs.S..2006..Differential.protein.distributions.define.two.sub.compartments.of.the.mitochondrial.inner.membrane.in.yeast..FEBS.Lett.580.24..5628.34	0.000996027760168312	"6/8"	"6/165"	53	W
Literature	Bruckmann.A..et.al...2009..Proteome.analysis.of.aerobically.and.anaerobically.grown.Saccharomyces.cerevisiae.cells..J.Proteomics.71.6..662.9	0.00120778017360082	"8/16"	"8/165"	53	W
Literature	Woo.DK..et.al...2009..Multiple.pathways.of.mitochondrial.nuclear.communication.in.yeast..Intergenomic.signaling.involves.ABF1.and.affects.a.different.set.of.genes.than.retrograde.regulation..Biochim.Biophys.Acta.1789.2..135.45	0.00124882935856035	"11/32"	"11/165"	53	W
Literature	Van.Der.Laan.M..et.al...2006..A.role.for.Tim21.in.membrane.potential.dependent.preprotein.sorting.in.mitochondria..Curr.Biol.16.22..2271.6	0.00142380616613954	"7/12"	"7/165"	53	W
Literature	Frederick.RL..et.al...2008..Multiple.pathways.influence.mitochondrial.inheritance.in.budding.yeast..Genetics.178.2..825.37	0.0020786648922812	"9/22"	"9/165"	53	W
Literature	Lill.R.and.Muhlenhoff.U..2008..Maturation.of.iron.sulfur.proteins.in.eukaryotes..mechanisms..connected.processes..and.diseases..Annu.Rev.Biochem.77.669.700	0.00209019652763411	"8/17"	"8/165"	53	W
Literature	Cortes.Rojo.C..et.al...2011..Electron.transport.chain.dysfunction.by.H.2.O..2..is.linked.to.increased.reactive.oxygen.species.production.and.iron.mobilization.by.lipoperoxidation..studies.using.Saccharomyces.cerevisiae.mitochondria..J.Bioenerg.Biomembr.43.2..135.47	0.0033099548221646	"5/6"	"5/165"	53	W
Literature	Fontanesi.F..et.al...2010..Mss51.and.ssc1.facilitate.translational.regulation.of.cytochrome.C.oxidase.biogenesis..Mol.Cell.Biol.30.1..245.59	0.0033099548221646	"5/6"	"5/165"	53	W
Literature	Khalimonchuk.O..et.al...2010..Formation.of.the.redox.cofactor.centers.during.Cox1.maturation.in.yeast.cytochrome.oxidase..Mol.Cell.Biol.30.4..1004.17	0.0033099548221646	"5/6"	"5/165"	53	W
Literature	Kormuth.KA..et.al...2016..Homologous.PNA.Hybridization.to.Noncanonical.DNA.G.Quadruplexes..Biochemistry.55.12..1749.57	0.0033099548221646	"5/6"	"5/165"	53	W
Literature	Mick.DU..et.al...2007..Shy1.couples.Cox1.translational.regulation.to.cytochrome.c.oxidase.assembly..EMBO.J.26.20..4347.58	0.0033099548221646	"5/6"	"5/165"	53	W
Literature	Mick.DU..et.al...2010..Coa3.and.Cox14.are.essential.for.negative.feedback.regulation.of.COX1.translation.in.mitochondria..J.Cell.Biol.191.1..141.54	0.0033099548221646	"5/6"	"5/165"	53	W
Literature	Schreiner.B..et.al...2012..Role.of.the.AAA.protease.Yme1.in.folding.of.proteins.in.the.intermembrane.space.of.mitochondria..Mol.Biol.Cell.23.22..4335.46	0.0033099548221646	"5/6"	"5/165"	53	W
Literature	Tamura.Y..et.al...2009..Ups1p.and.Ups2p.antagonistically.regulate.cardiolipin.metabolism.in.mitochondria..J.Cell.Biol.185.6..1029.45	0.0033099548221646	"5/6"	"5/165"	53	W
Literature	Neupert.W..2012..A.mitochondrial.odyssey..Annu.Rev.Biochem.81...1.33	0.00332194798963019	"8/18"	"8/165"	53	W
Literature	Rintala.E..et.al...2009..Low.oxygen.levels.as.a.trigger.for.enhancement.of.respiratory.metabolism.in.Saccharomyces.cerevisiae..BMC.Genomics.10...461	0.00460009732274726	"20/108"	"20/165"	53	W
Literature	Patil.KR.and.Nielsen.J..2005..Uncovering.transcriptional.regulation.of.metabolism.by.using.metabolic.network.topology..Proc.Natl.Acad.Sci.U.S.A.102.8..2685.9	0.00463943332049523	"10/30"	"10/165"	53	W
Literature	Mokranjac.D.and.Neupert.W..2009..Thirty.years.of.protein.translocation.into.mitochondria..unexpectedly.complex.and.still.puzzling..Biochim.Biophys.Acta.1793.1..33.41	0.00493188672352704	"7/14"	"7/165"	53	W
Literature	Sonderegger.M..et.al...2004..Molecular.basis.for.anaerobic.growth.of.Saccharomyces.cerevisiae.on.xylose..investigated.by.global.gene.expression.and.metabolic.flux.analysis..Appl.Environ.Microbiol.70.4..2307.17	0.00493188672352704	"7/14"	"7/165"	53	W
Literature	Acosta.MJ..et.al...2016..Coenzyme.Q.biosynthesis.in.health.and.disease..Biochim.Biophys.Acta.1857.8..1079.85	0.00579254705724914	"6/10"	"6/165"	53	W
Literature	Bollon.AP.and.Magee.PT..1973..Involvement.of.threonine.deaminase.in.repression.of.the.isoleucine.valine.and.leucine.pathways.in.Saccharomyces.cerevisiae..J.Bacteriol.113.3..1333.44	0.00822867293268979	"4/4"	"4/165"	53	W
Literature	Brandina.I..et.al...2006..Enolase.takes.part.in.a.macromolecular.complex.associated.to.mitochondria.in.yeast..Biochim.Biophys.Acta.1757.9.10..1217.1228	0.00822867293268979	"4/4"	"4/165"	53	W
Literature	Ebner.E.and.Schatz.G..1973..Mitochondrial.assembly.in.respiration.deficient.mutants.of.Saccharomyces.cerevisiae..3..A.nuclear.mutant.lacking.mitochondrial.adenosine.triphosphatase..J.Biol.Chem.248.15..5379.84	0.00822867293268979	"4/4"	"4/165"	53	W
Literature	Friedman.JR..et.al...2015..MICOS.coordinates.with.respiratory.complexes.and.lipids.to.establish.mitochondrial.inner.membrane.architecture..Elife.4..	0.00822867293268979	"4/4"	"4/165"	53	W
Literature	Jimenez.L..et.al...2014..Mitochondrial.ATP.synthases.cluster.as.discrete.domains.that.reorganize.with.the.cellular.demand.for.oxidative.phosphorylation..J.Cell.Sci.127.Pt.4..719.26	0.00822867293268979	"4/4"	"4/165"	53	W
Literature	Lee.YJ..et.al...2011..TCA.cycle.independent.acetate.metabolism.via.the.glyoxylate.cycle.in.Saccharomyces.cerevisiae..Yeast.28.2..153.66	0.00822867293268979	"4/4"	"4/165"	53	W
Literature	Magee.PT.and.Hereford.LM..1969..Multivalent.repression.of.isoleucine..valine.biosynthesis.in.Saccharomyces.cerevisiae..J.Bacteriol.98.3..857.62	0.00822867293268979	"4/4"	"4/165"	53	W
Literature	McStay.GP..et.al...2013..Modular.assembly.of.yeast.cytochrome.oxidase..Mol.Biol.Cell.24.4..440.52	0.00822867293268979	"4/4"	"4/165"	53	W
Literature	Muhlenhoff.U..et.al...2003..Components.involved.in.assembly.and.dislocation.of.iron.sulfur.clusters.on.the.scaffold.protein.Isu1p..EMBO.J.22.18..4815.25	0.00822867293268979	"4/4"	"4/165"	53	W
Literature	Neupert.W.and.Herrmann.JM..2007..Translocation.of.proteins.into.mitochondria..Annu.Rev.Biochem.76.723.49	0.00822867293268979	"7/15"	"7/165"	53	W
Literature	Stevens.TH..et.al...1982..The.nature.of.CuA.in.cytochrome.c.oxidase..J.Biol.Chem.257.20..12106.13	0.00822867293268979	"4/4"	"4/165"	53	W
Literature	Tomaska.L..2002..Yeast.as.a.model.for.mitochondria.related.human.disorders..FEMS.Yeast.Res.2.1..VI.IX	0.00822867293268979	"7/15"	"7/165"	53	W
Literature	Zeng.X..et.al...2007..The.metalloprotease.encoded.by.ATP23.has.a.dual.function.in.processing.and.assembly.of.subunit.6.of.mitochondrial.ATPase..Mol.Biol.Cell.18.2..617.26	0.00822867293268979	"4/4"	"4/165"	53	W
Literature	Picotti.P..et.al...2009..Full.dynamic.range.proteome.analysis.of.S..cerevisiae.by.targeted.proteomics..Cell.138.4..795.806	0.00848191485697674	"9/26"	"9/165"	53	W
Literature	Allan.CM..et.al...2015..Identification.of.Coq11..a.New.Coenzyme.Q.Biosynthetic.Protein.in.the.CoQ.Synthome.in.Saccharomyces.cerevisiae..J.Biol.Chem.290.12..7517.34	0.00891436887949886	"5/7"	"5/165"	53	W
Literature	Barros.MH..et.al...2003..H.2.O.2..generation.in.Saccharomyces.cerevisiae.respiratory.pet.mutants..effect.of.cytochrome.c..Free.Radic.Biol.Med.35.2..179.88	0.00891436887949886	"5/7"	"5/165"	53	W
Literature	Braun.RJ..2012..Mitochondrion.mediated.cell.death..dissecting.yeast.apoptosis.for.a.better.understanding.of.neurodegeneration..Front.Oncol.2...182	0.00891436887949886	"5/7"	"5/165"	53	W
Literature	Chacinska.A.and.Boguta.M..2000..Coupling.of.mitochondrial.translation.with.the.formation.of.respiratory.complexes.in.yeast.mitochondria..Acta.Biochim.Pol.47.4..973.91	0.00891436887949886	"5/7"	"5/165"	53	W
Literature	Gelling.C..et.al...2008..Mitochondrial.Iba57p.Is.Required.for.Fe.S.Cluster.Formation.on.Aconitase.and.Activation.of.Radical.SAM.Enzymes..Mol.Cell.Biol.28.5..1851.1861	0.00891436887949886	"5/7"	"5/165"	53	W
Literature	Kehrein.K..et.al...2015..Organization.of.Mitochondrial.Gene.Expression.in.Two.Distinct.Ribosome.Containing.Assemblies..Cell.Rep...	0.00891436887949886	"5/7"	"5/165"	53	W
Literature	Laredj.LN..et.al...2014..The.molecular.genetics.of.coenzyme.Q.biosynthesis.in.health.and.disease..Biochimie.100...78.87	0.00891436887949886	"5/7"	"5/165"	53	W
Literature	McCammon.MT..et.al...2003..Global.transcription.analysis.of.Krebs.tricarboxylic.acid.cycle.mutants.reveals.an.alternating.pattern.of.gene.expression.and.effects.on.hypoxic.and.oxidative.genes..Mol.Biol.Cell.14.3..958.72	0.00891436887949886	"5/7"	"5/165"	53	W
Literature	Rak.M..et.al...2009..Assembly.of.F.0..in.Saccharomyces.cerevisiae..Biochim.Biophys.Acta.1793.1..108.16	0.00891436887949886	"5/7"	"5/165"	53	W
Literature	Rouault.TA.and.Tong.WH..2005..Iron.sulphur.cluster.biogenesis.and.mitochondrial.iron.homeostasis..Nat.Rev.Mol.Cell.Biol.6.4..345.51	0.00891436887949886	"5/7"	"5/165"	53	W
Literature	Thorpe.GW..et.al...2013..Superoxide.radicals.have.a.protective.role.during.H2O2.stress..Mol.Biol.Cell.24.18..2876.84	0.00891436887949886	"5/7"	"5/165"	53	W
Literature	Dohm.JC..et.al...2006..Horizontal.gene.transfer.in.aminoacyl.tRNA.synthetases.including.leucine.specific.subtypes..J.Mol.Evol.63.4..437.47	0.00999341099911903	"6/11"	"6/165"	53	W
Literature	Hecht.SM.and.Chinualt.AC..1976..Position.of.aminoacylation.of.individual.Escherichia.coli.and.yeast.tRNAs..Proc.Natl.Acad.Sci.U.S.A.73.2..405.9	0.00999341099911903	"6/11"	"6/165"	53	W
Literature	Mondal.UK..et.al...2008..Nucleotide.Triplet.Based.Molecular.Phylogeny.of.Class.I.and.Class.II.Aminoacyl.t.RNA.Synthetase.in.Three.Domain.of.Life.Process..Bacteria..Archaea..and.Eukarya..J.Biomol.Struct.Dyn.26.3..321.8	0.00999341099911903	"6/11"	"6/165"	53	W
Literature	Onder.O..et.al...2006..Modifications.of.the.lipoamide.containing.mitochondrial.subproteome.in.a.yeast.mutant.defective.in.cysteine.desulfurase..Mol.Cell.Proteomics.5.8..1426.36	0.00999341099911903	"6/11"	"6/165"	53	W
Literature	Dudek.J..et.al...2013..Mitochondrial.protein.import..Common.principles.and.physiological.networks..Biochim.Biophys.Acta.1833.2..274.85	0.0103883292271103	"8/21"	"8/165"	53	W
Literature	Gudipati.V..et.al...2014..The.flavoproteome.of.the.yeast.Saccharomyces.cerevisiae..Biochim.Biophys.Acta.1844.3..535.544	0.0108349376057267	"9/27"	"9/165"	53	W
Literature	Lee.YL.and.Lee.CK..2008..Transcriptional.Response.According.to.Strength.of.Calorie.Restriction.in.Saccharomyces.cerevisiae..Mol.Cells.26.3..299.307	0.0119000482976379	"7/16"	"7/165"	53	W
Literature	Bockler.S.and.Westermann.B..2014..Mitochondrial.ER.Contacts.Are.Crucial.for.Mitophagy.in.Yeast..Dev.Cell.28.4..450.8	0.0131327000344212	"11/41"	"11/165"	53	W
Literature	Chen.XJ..et.al...2005..Aconitase.couples.metabolic.regulation.to.mitochondrial.DNA.maintenance..Science.307.5710..714.7	0.0182911375705105	"6/12"	"6/165"	53	W
Literature	Sharma.AK..et.al...2010..Cytosolic.Iron.Sulfur.Cluster.Assembly..CIA..System..Factors..Mechanism..and.Relevance.to.Cellular.Iron.Regulation..J.Biol.Chem.285.35..26745.51	0.0182911375705105	"6/12"	"6/165"	53	W
Literature	Fontanesi.F..et.al...2009..Evaluation.of.the.mitochondrial.respiratory.chain.and.oxidative.phosphorylation.system.using.yeast.models.of.OXPHOS.deficiencies..Curr.Protoc.Hum.Genet.Chapter.19...Unit19.5	0.0199964600248676	"5/8"	"5/165"	53	W
Literature	Gamberi.T..et.al...2012..Evaluation.of.SCO1.deletion.on.Saccharomyces.cerevisiae.metabolism.through.a.proteomic.approach..Proteomics.12.11..1767.80	0.0199964600248676	"5/8"	"5/165"	53	W
Literature	Johnson.DC..et.al...2005..Structure..function..and.formation.of.biological.iron.sulfur.clusters..Annu.Rev.Biochem.74.247.81	0.0199964600248676	"5/8"	"5/165"	53	W
Literature	Melber.A..et.al...2016..Role.of.Nfu1.and.Bol3.in.iron.sulfur.cluster.transfer.to.mitochondrial.clients..Elife.5..	0.0199964600248676	"5/8"	"5/165"	53	W
Literature	Papini.M..et.al...2012..Scheffersomyces.stipitis..a.comparative.systems.biology.study.with.the.Crabtree.positive.yeast.Saccharomyces.cerevisiae..Microb.Cell.Fact.11.1..136	0.0199964600248676	"5/8"	"5/165"	53	W
Literature	Samuli.Kursu.VA..et.al...2013..Defects.in.mitochondrial.fatty.acid.synthesis.result.in.failure.of.multiple.aspects.of.mitochondrial.biogenesis.in.Saccharomyces.cerevisiae..Mol.Microbiol.90.4..824.40	0.0199964600248676	"5/8"	"5/165"	53	W
Literature	Shingu.Vazquez.M.and.Traven.A..2011..Mitochondria.and.fungal.pathogenesis..drug.tolerance..virulence..and.potential.for.antifungal.therapy..Eukaryot.Cell.10.11..1376.83	0.0199964600248676	"5/8"	"5/165"	53	W
Literature	van.Leeuwen.JS..et.al...2011..Subunits.Rip1p.and.Cox9p.of.the.respiratory.chain.contribute.to.diclofenac.induced.mitochondrial.dysfunction..Microbiology.157.Pt.3..685.94	0.0199964600248676	"5/8"	"5/165"	53	W
Literature	von.Plehwe.U..et.al...2009..The.Hsp70.homolog.Ssb.is.essential.for.glucose.sensing.via.the.SNF1.kinase.network..Genes.Dev.23.17..2102.15	0.0199964600248676	"5/8"	"5/165"	53	W
Literature	Wu.X..et.al...2006..Prediction.of.yeast.protein.protein.interaction.network..insights.from.the.Gene.Ontology.and.annotations..Nucleic.Acids.Res.34.7..2137.50	0.0199964600248676	"9/29"	"9/165"	53	W
Literature	Xu.XM.and.Moller.SG..2011..Iron.sulfur.clusters..biogenesis..molecular.mechanisms..and.their.functional.significance..Antioxid.Redox.Signal.15.1..271.307	0.0199964600248676	"5/8"	"5/165"	53	W
Literature	Bakker.BM..et.al...2001..Stoichiometry.and.compartmentation.of.NADH.metabolism.in.Saccharomyces.cerevisiae..FEMS.Microbiol.Rev.25.1..15.37	0.0284424120136765	"4/5"	"4/165"	53	W
Literature	Barros.MH..et.al...2005..The.Saccharomyces.cerevisiae.COQ10.gene.encodes.a.START.domain.protein.required.for.function.of.coenzyme.Q.in.respiration..J.Biol.Chem.280.52..42627.35	0.0284424120136765	"4/5"	"4/165"	53	W
Literature	Corral.Debrinski.M..et.al...2000..In.yeast..the.3..untranslated.region.or.the.presequence.of.ATM1.is.required.for.the.exclusive.localization.of.its.mRNA.to.the.vicinity.of.mitochondria..Mol.Cell.Biol.20.21..7881.92	0.0284424120136765	"4/5"	"4/165"	53	W
Literature	Francis.BR..et.al...2007..Mutations.in.the.Atp1p.and.Atp3p.subunits.of.yeast.ATP.synthase.differentially.affect.respiration.and.fermentation.in.Saccharomyces.cerevisiae..J.Bioenerg.Biomembr.39.2..127.44	0.0284424120136765	"4/5"	"4/165"	53	W
Literature	Gan.X..et.al...2002..Tag.mediated.isolation.of.yeast.mitochondrial.ribosome.and.mass.spectrometric.identification.of.its.new.components..Eur.J.Biochem.269.21..5203.14	0.0284424120136765	"6/13"	"6/165"	53	W
Literature	Gebert.N..et.al...2011..Dual.Function.of.Sdh3.in.the.Respiratory.Chain.and.TIM22.Protein.Translocase.of.the.Mitochondrial.Inner.Membrane..Mol.Cell.44.5..811.8	0.0284424120136765	"4/5"	"4/165"	53	W
Literature	Gohil.VM..et.al...2004..Cardiolipin.biosynthesis.and.mitochondrial.respiratory.chain.function.are.interdependent..J.Biol.Chem.279.41..42612.8	0.0284424120136765	"4/5"	"4/165"	53	W
Literature	Hacioglu.E..et.al...2012..Identification.of.respiratory.chain.gene.mutations.that.shorten.replicative.life.span.in.yeast..Exp.Gerontol.47.2..149.53	0.0284424120136765	"4/5"	"4/165"	53	W
Literature	Irazusta.V..et.al...2008..Major.targets.of.iron.induced.protein.oxidative.damage.in.frataxin.deficient.yeasts.are.magnesium.binding.proteins..Free.Radic.Biol.Med.44.9..1712.1723	0.0284424120136765	"4/5"	"4/165"	53	W
Literature	Kerscher.SJ..2000..Diversity.and.origin.of.alternative.NADH.ubiquinone.oxidoreductases..Biochim.Biophys.Acta.1459.2.3..274.83	0.0284424120136765	"4/5"	"4/165"	53	W
Literature	Lauffer.S..et.al...2012..Saccharomyces.cerevisiae.porin.pore.forms.complexes.with.mitochondrial.outer.membrane.proteins.Om14p.and.Om45p..J.Biol.Chem.287.21..17447.58	0.0284424120136765	"4/5"	"4/165"	53	W
Literature	Major.T..et.al...2006..Proteomic.analysis.of.mitochondrial.protein.turnover..identification.of.novel.substrate.proteins.of.the.matrix.protease.pim1..Mol.Cell.Biol.26.3..762.76	0.0284424120136765	"4/5"	"4/165"	53	W
Literature	Margeot.A..et.al...2005..Why.are.many.mRNAs.translated.to.the.vicinity.of.mitochondria..a.role.in.protein.complex.assembly..Gene.354...64.71	0.0284424120136765	"4/5"	"4/165"	53	W
Literature	Mileykovskaya.E..et.al...2012..Arrangement.of.the.respiratory.chain.complexes.in.Saccharomyces.cerevisiae.supercomplex.III2IV2.revealed.by.single.particle.cryo.electron.microscopy..J.Biol.Chem.287.27..23095.103	0.0284424120136765	"4/5"	"4/165"	53	W
Literature	Mokranjac.D..et.al...2009..Role.of.Tim50.in.the.transfer.of.precursor.proteins.from.the.outer.to.the.inner.membrane.of.mitochondria..Mol.Biol.Cell.20.5..1400.7	0.0284424120136765	"4/5"	"4/165"	53	W
Literature	Monribot.Espagne.C.and.Boucherie.H..2002..Differential.gel.exposure..a.new.methodology.for.the.two.dimensional.comparison.of.protein.samples..Proteomics.2.3..229.40	0.0284424120136765	"4/5"	"4/165"	53	W
Literature	Morin.M..et.al...2007..Proteomic.analysis.reveals.metabolic.changes.during.yeast.to.hypha.transition.in.Yarrowia.lipolytica..J.Mass.Spectrom.42.11..1453.62	0.0284424120136765	"4/5"	"4/165"	53	W
Literature	Rak.M.and.Tzagoloff.A..2009..F1.dependent.translation.of.mitochondrially.encoded.Atp6p.and.Atp8p.subunits.of.yeast.ATP.synthase..Proc.Natl.Acad.Sci.U.S.A.106.44..18509.14	0.0284424120136765	"4/5"	"4/165"	53	W
Literature	Ray.D.and.Ye.P..2013..Characterization.of.the.metabolic.requirements.in.yeast.meiosis..PLoS.One.8.5..e63707	0.0284424120136765	"4/5"	"4/165"	53	W
Literature	Schonauer.MS..et.al...2009..Lipoic.Acid.synthesis.and.attachment.in.yeast.mitochondria..J.Biol.Chem.284.35..23234.42	0.0284424120136765	"4/5"	"4/165"	53	W
Literature	Tahara.EB..et.al...2011..Respiratory.and.TCA.cycle.activities.affect.S..cerevisiae.lifespan..response.to.caloric.restriction.and.mtDNA.stability..J.Bioenerg.Biomembr.43.5..483.91	0.0284424120136765	"4/5"	"4/165"	53	W
Literature	Wang.J..et.al...2010..Gene.regulatory.changes.in.yeast.during.life.extension.by.nutrient.limitation..Exp.Gerontol.45.7.8..621.31	0.0284424120136765	"8/24"	"8/165"	53	W
Literature	Wang.Z..et.al...2009..Regulation.of.the.Heme.A.Biosynthetic.Pathway..DIFFERENTIAL.REGULATION.OF.HEME.A.SYNTHASE.AND.HEME.O.SYNTHASE.IN.SACCHAROMYCES.CEREVISIAE..J.Biol.Chem.284.2..839.47	0.0284424120136765	"4/5"	"4/165"	53	W
Literature	Wenz.T..et.al...2009..Role.of.phospholipids.in.respiratory.cytochrome.bc.1..complex.catalysis.and.supercomplex.formation..Biochim.Biophys.Acta.1787.6..609.16	0.0284424120136765	"4/5"	"4/165"	53	W
Literature	Leadsham.JE.and.Gourlay.CW..2010..cAMP.PKA.signaling.balances.respiratory.activity.with.mitochondria.dependent.apoptosis.via.transcriptional.regulation..BMC.Cell.Biol.11...92	0.0362663810208771	"7/19"	"7/165"	53	W
Literature	Kawamukai.M..2015..Biosynthesis.of.coenzyme.Q.in.eukaryotes..Biosci.Biotechnol.Biochem.80.1..23.33	0.0369100533443049	"5/9"	"5/165"	53	W
Literature	Lill.R..et.al...2006..Mechanisms.of.iron.sulfur.protein.maturation.in.mitochondria..cytosol.and.nucleus.of.eukaryotes..Biochim.Biophys.Acta.1763.7..652.67	0.0369100533443049	"5/9"	"5/165"	53	W
Literature	Perez.Martinez.X..et.al...2008..Protein.synthesis.and.assembly.in.mitochondrial.disorders..Curr.Top.Med.Chem.8.15..1335.50	0.0369100533443049	"5/9"	"5/165"	53	W
Literature	Vogel.F..et.al...2006..Dynamic.subcompartmentalization.of.the.mitochondrial.inner.membrane..J.Cell.Biol.175.2..237.47	0.0369100533443049	"5/9"	"5/165"	53	W
Literature	Boender.LG..et.al...2011..Cellular.responses.of.Saccharomyces.cerevisiae.at.near.zero.growth.rates..transcriptome.analysis.of.anaerobic.retentostat.cultures..FEMS.Yeast.Res.11.8..603.20	0.0389040396980518	"9/32"	"9/165"	53	W
Literature	Dikicioglu.D..et.al...2008..Integration.of.metabolic.modeling.and.phenotypic.data.in.evaluation.and.improvement.of.ethanol.production.using.respiration.deficient.mutants.of.Saccharomyces.cerevisiae..Appl.Environ.Microbiol.74.18..5809.16	0.0424392131191314	"6/14"	"6/165"	53	W
Literature	Ichimura.T..et.al...2004..Transcriptomic.and.proteomic.analysis.of.a.14.3.3.gene.deficient.yeast..Biochemistry.43.20..6149.58	0.0424392131191314	"6/14"	"6/165"	53	W
Literature	Lister.R..et.al...2005..Protein.import.into.mitochondria..origins.and.functions.today..review...Mol.Membr.Biol.22.1.2..87.100	0.0424392131191314	"6/14"	"6/165"	53	W
Literature	Van.Der.Laan.M..et.al...2006..Mitochondrial.preprotein.translocases.as.dynamic.molecular.machines..FEMS.Yeast.Res.6.6..849.61	0.0424392131191314	"6/14"	"6/165"	53	W
Phenotype	respiratory.growth..decreased.rate	4.25653672888485e-39	"81/258"	"81/165"	53	W
Phenotype	respiratory.growth..absent	6.55384097551519e-31	"71/244"	"71/165"	53	W
Phenotype	mitochondrial.genome.maintenance..absent	2.66535028048441e-19	"25/39"	"25/165"	53	W
Phenotype	mitochondrial.morphology..abnormal	1.17565958170912e-13	"38/141"	"38/165"	53	W
Phenotype	mitochondrial.genome.maintenance..abnormal	1.91839061137007e-13	"24/55"	"24/165"	53	W
Phenotype	utilization.of.carbon.source..decreased	2.45113508039121e-13	"37/138"	"37/165"	53	W
Phenotype	utilization.of.carbon.source..decreased.rate	1.66026767391469e-11	"43/207"	"43/165"	53	W
Phenotype	petite	2.49292217951371e-11	"13/17"	"13/165"	53	W
Phenotype	chemical.compound.accumulation..decreased	1.48284982694789e-10	"79/619"	"79/165"	53	W
Phenotype	chronological.lifespan..decreased	1.54434639346601e-07	"57/427"	"57/165"	53	W
Phenotype	respiratory.growth..decreased	1.54434639346601e-07	"28/130"	"28/165"	53	W
Phenotype	utilization.of.nitrogen.source..decreased.rate	6.18779460446225e-07	"64/529"	"64/165"	53	W
Phenotype	stress.resistance..increased	9.39921164098507e-07	"34/197"	"34/165"	53	W
Phenotype	utilization.of.carbon.source..absent	1.09181592095822e-06	"16/50"	"16/165"	53	W
Phenotype	desiccation.resistance..decreased	5.27985816877703e-06	"53/423"	"53/165"	53	W
Phenotype	biofilm.formation..increased	3.44465357281874e-05	"19/87"	"19/165"	53	W
Phenotype	mitochondrial.genome.maintenance..decreased	3.44465357281874e-05	"7/11"	"7/165"	53	W
Phenotype	oxidative.stress.resistance..decreased	3.44465357281874e-05	"48/387"	"48/165"	53	W
Phenotype	cell.size..decreased	0.000456677595457897	"20/112"	"20/165"	53	W
Phenotype	mitochondrial.rho..mutation.frequency..increased	0.00148966801652004	"8/23"	"8/165"	53	W
Phenotype	survival.rate.in.stationary.phase..decreased	0.00407350227487752	"9/33"	"9/165"	53	W
Phenotype	chemical.compound.accumulation..increased	0.00782734711178643	"70/779"	"70/165"	53	W
Phenotype	petite.negative	0.0111527383872093	"6/17"	"6/165"	53	W
Phenotype	protein.peptide.accumulation..absent	0.025117203176177	"3/4"	"3/165"	53	W
Phenotype	respiratory.metabolism..decreased	0.027393859221771	"6/20"	"6/165"	53	W
Phenotype	biofilm.formation..decreased	0.0338864037888469	"18/133"	"18/165"	53	W
